# Supplementary material
Source: PubMed Central journal article supplement (PMC7990026)
Supplement: NIHMS1657274-supplement-supp_pdf.pdf [file NIHMS1657274-supplement-supp_pdf.pdf]

# Supplementary Materials for Simultaneous cross-evaluation of heterogeneous *E.* *coli* datasets via mechanistic simulation

Derek N. Macklin<sup>1†</sup>, Travis A. Ahn-Horst<sup>2,3†</sup>, Heejo Choi<sup>2,3†</sup>, Nicholas A. Ruggero<sup>4†</sup>,  
Javier Carrera<sup>5†</sup>, John C. Mason<sup>6†</sup>, Gwanggyu Sun<sup>2,3</sup>, Eran Agmon<sup>2,3</sup>,  
Mialy M. DeFelice<sup>2,3</sup>, Inbal Maayan<sup>2,3</sup>, Keara Lane<sup>7</sup>, Ryan K. Spangler<sup>2,3</sup>,  
Taryn E. Gillies<sup>2,3</sup>, Morgan L. Paull<sup>8</sup>, Sajia Akhter<sup>2</sup>, Samuel R. Bray<sup>2</sup>,  
Daniel S. Weaver<sup>4</sup>, Ingrid M. Keseler<sup>9</sup>, Peter D. Karp<sup>9</sup>, Jerry H. Morrison<sup>3</sup>,  
Markus W. Covert<sup>2,3\*</sup>

<sup>1</sup>Grand Rounds, Inc, San Francisco, CA 94107, USA

<sup>2</sup>Department of Bioengineering, Stanford University, Stanford, CA 94305, USA

<sup>3</sup>Allen Discovery Center at Stanford University, Stanford University, Stanford, CA 94305, USA

<sup>4</sup>X, Mountain View, CA 94305, USA

<sup>5</sup>Zymergen, Emeryville, CA 94608, USA

<sup>6</sup>Intrexon, South San Francisco CA 94080, USA

<sup>7</sup>Department of Molecular Biosciences, Northwestern University, Evanston, IL 60208, USA

<sup>8</sup>BridgeBio Pharma, Palo Alto, CA 94301, USA

<sup>9</sup>SRI International, Menlo Park, CA 94025, USA

<sup>†</sup>These authors contributed equally to this work.

\*Correspondence to: mcovert@stanford.edu.

**This PDF file includes:**

Methods

Fig S1 - S5

Tables S1 - S9

Movie S1 - S2

References

# Contents

|          |                                                                                                                              |           |
|----------|------------------------------------------------------------------------------------------------------------------------------|-----------|
| <b>1</b> | <b>Methods</b>                                                                                                               | <b>4</b>  |
| 1.1      | Computational and Modeling Methods . . . . .                                                                                 | 4         |
| 1.1.1    | Overview . . . . .                                                                                                           | 4         |
| 1.1.2    | Improvements over previous work . . . . .                                                                                    | 5         |
| 1.1.3    | Model construction . . . . .                                                                                                 | 7         |
| 1.1.4    | Simulation algorithm . . . . .                                                                                               | 7         |
| 1.1.5    | Initializing simulations . . . . .                                                                                           | 10        |
| 1.1.6    | Processes . . . . .                                                                                                          | 18        |
| 1.2      | Simulation analysis methods . . . . .                                                                                        | 60        |
| 1.2.1    | Multiple-generation simulations of the cellular response to an environmental shift (related to Fig. 1 and Fig. S1) . . . . . | 60        |
| 1.2.2    | Simulation of physiological measurements (related to Fig. 2 and Fig. S2)                                                     | 63        |
| 1.2.3    | Analysis of the metabolic network sub-model. (Related to Fig. 3 and Fig. S3.) . . . . .                                      | 73        |
| 1.2.4    | Sub-generational expression analysis (related to Fig. 4 and Fig. S4). . .                                                    | 80        |
| 1.2.5    | Protein steady-state analysis (related to Fig. 5A) . . . . .                                                                 | 83        |
| 1.3      | Experimental Methods . . . . .                                                                                               | 84        |
| 1.3.1    | RNA Sequencing and Analysis . . . . .                                                                                        | 84        |
| 1.3.2    | Protein Half-Life Measurement . . . . .                                                                                      | 85        |
| 1.3.3    | Immunofluoresence . . . . .                                                                                                  | 87        |
| 1.3.4    | Absolute-Quantative PCR . . . . .                                                                                            | 87        |
| <b>2</b> | <b>Supplemental Figures</b>                                                                                                  | <b>89</b> |



# 1 Methods

Our methods have been organized into three groups to facilitate navigation of this document: (1) computational and modeling methods, which describe how our model was created, parameterized and used to run simulations; (2) simulation analysis methods, which describe in detail how all the work described in the main text was performed; and (3) experimental methods, which details our protein half-life and mRNA expression work.

## 1.1 Computational and Modeling Methods

### 1.1.1 Overview

We constructed a large-scale, integrated mathematical model of a cell that integrated as much organism-specific data as possible, across multiple environments and growth conditions, in which results and predictions could be experimentally verified. This effort required major innovation in data integration, modeling framework extensibility, and feedback regulation, all of which are described in more detail here. This text also serves as a companion to our source code (<https://github.com/CovertLab/WholeCellEcoliRelease>).

Running our large-scale cell model may be thought of as similar (but not strictly equivalent) to numerical integration of a system of ordinary differential equations, where the cellular states are analogous to the ODE state variables and the cellular processes are analogous to the differential equations (*1*). The most significant difference from ODE numerical integration is that shared resources stored in cellular states must be partitioned to each cellular process in order to ensure mass conservation (described in more detail below).

The model is primarily implemented in Python, with Cython used for computationally intensive inner loops. Workflows are defined, managed, and executed using FireWorks - a free open-source code for automating workflow execution which can be defined in Python (*2*). The model uses an application program interface (API) developed to facilitate model development,

human readability, and consistent coding style.

### 1.1.2 Improvements over previous work

For readers familiar with our *M. genitalium* model (3), we summarize our improvements over that model in terms of modeling and computation briefly here. The most important modeling improvements are as follows:

- The optimization method used to simulate behavior of the metabolic model is much more robust and includes detailed quantitative (Michaelis-Menten) parameters for 380 reactions. The metabolic model now maintains concentrations of metabolite pools subject to resource availability rather than producing metabolites in a fixed ratio at every time step. This enables the metabolic model to adjust to time-dependent/cell cycle-dependent behavior from other simulated processes while maintaining homeostasis.
- Our model of translation uses translational efficiency data to inform ribosome binding to mRNA transcripts.
- We have a more detailed model of RNA decay that incorporates both the rates of degradation due to endonuclease-mediated cleavage and the rates of transcript digestion by exoRNases.
- Our simulated *E. coli* cells grow at different doubling times as a function of the environment. This improvement, supported by our model of DNA replication which can track multiple rounds of replication, is showcased in the main text and was not possible in the *M. genitalium* simulation.
- We have a quantitative model of transcriptional regulation that incorporates the function of 22 transcription factors regulating 355 genes. This includes one- and two-component

signaling processes to modulate transcription factor activity, as well as the modulation of RNA polymerase recruitment via TF-DNA binding interactions.

Similarly, the major computational improvements are listed here:

- We have decreased simulation run-time by nearly two orders of magnitude. Whereas *M. genitalium* simulations took roughly 10 hours to run, *E. coli* simulations—which account for 50 times more molecules—take approximately 15 minutes to simulate the life cycle of an *E. coli* cell. We achieved this by improving file I/O, writing inner loops in Cython or C, and warm-starting the linear solver in our metabolic model.
- This improvement in run-time, together with recently published insights into cell growth and division (4, 5) enables us to reliably simulate multiple generations of cells (as showcased in the main text), which was not possible with the *M. genitalium* simulations.
- Additionally, we have improved the whole-cell application programming interface (API). Code is much more readable, and on-boarding new researchers takes roughly 2 weeks rather than 6 months.

Finally, while the model presented here is not gene-complete, it incorporates the biological processes for which the majority of high-throughput data is available. We spent considerable effort evaluating data sets and merging them into our framework. Ultimately, this enabled us to make the quantitative comparisons presented in the main text—comparisons that could not be made when modeling *M. genitalium*. However, this version of the *E. coli* model lacks several of the sub-models implemented in the *M. genitalium* model and additional *E. coli* specific gene functionality such as detailed DNA interactions, antibiotic resistance, protein maturation, toxin/antitoxin pairs, stress response and physical structures of the cell. We continue working

toward a gene-complete model of *E. coli* and until all functionality is included, certain predictions will lack the desired accuracy such as growth in the presence of antibiotics or other environmental stresses and simulations of gene knockouts for genes without a functional implementation. A list of functionally implemented genes is provided in Table S6.

### **1.1.3 Model construction**

To construct the model and identify parameters, we begin with data sets from the primary literature, our own experiments, and databases (e.g., EcoCyc) which we unify into a Knowledge-Base. The bulk of the experimental data we used to parameterize the model comes from three lab strains of *E. coli*: K-12 MG1655, B/r, and BW25113. The model can therefore be thought of as a composite strain which uses all of these data. One drawback of this approach is that in some cases these strains have different physiology, with the most notable example being a difference in growth rate between MG1655 (where most high-throughput data comes from) and B/r (where detailed composition data have been obtained) under similar environmental conditions. Our model was optimized using the B/r growth rates.

### **1.1.4 Simulation algorithm**

As mentioned above, a whole-cell model may be thought of as similar to a system of ordinary differential equations (ODEs) where the cellular states are analogous to the ODE state variables and the cellular processes are analogous to the differential equations. Extending this analogy, the *E. coli* model is simulated using an algorithm that is comparable to those used to numerically integrate ODEs. The only significant difference from ODE numerical integration is that shared resources stored in cellular states must be partitioned to each cellular process in order to ensure mass conservation. Critically, we make the assumption that over a short time scale, each process acts independently and that the distribution of partitioned molecules maximally satisfies the relative needs of the processes, with higher priorities for some processes.



Algorithm 1 summarizes the simulation algorithm to execute a time step. The temporal evolution of the cell state is calculated on a short time scale (typically  $<1$  second) by allocating cell state variables among processes (described in Algorithm 1 under “Allocate shared resources”), and executing the process code that updates counts in the state variables until the cell divides. Here, “demand” refers to the number of molecules (amino acids, ATP, ribosomal subunits, for example) requested by each process when assuming full access to all molecules in the cell at that time step, providing a quantifiable idea of the maximum number of molecules each process is capable of processing. These demands are then used to compare requests for each molecule-type across different processes, which is used to partition the limited amount of shared resources to each cellular process, and thus ensure mass conservation. If the total demand is greater than the availability for a given resource, then the resource is divided between processes proportionally to the demand (e.g., if one process is responsible for half of the overall demand for a particular molecule, that process will receive one half of the limited resource); otherwise, no restriction of supply occurs. Metabolism is assigned the lowest request priority and is left with whatever molecules remain after partitioning to the other processes, further guaranteeing other processes their requested molecules.

Defining four critical parts of the simulation code will help to better understand our approach:

**States.** The simulation States are defined as the counts, locations, and attributes of every species in the model at a given time step, which are then operated on by Processes. There are two classes of States within the model - BulkMolecules and UniqueMolecules. The BulkMolecules state tracks species in the simulation where individuals are not further distinguished from each other. For example, two ATP molecules in the cytoplasm are considered identical and tracked in BulkMolecules. The UniqueMolecules state tracks species in the simulation where

individuals are distinguishable from each other by an attribute and cannot be interchanged without effect. For example, two ribosomes on different mRNA transcripts are uniquely identified by the transcript they are translating and their location on the transcript.

**Processes.** The simulation Processes update the simulation States from one time step to the next. Each Process represents an aspect of physiology of an *E. coli* cell. We discuss the implementation of each process in detail in Section 1.1.6.

**Listeners.** Listeners is a class that facilitates writing data to disk during simulation runtime. They create a human readable interface and reduce the file size of simulation output and post-hoc computation by saving user-specified quantities computed during a simulation.

**Views.** Views is a class that provides a programmatic interface that allow States and Processes to interact cleanly during simulation.

---

**Algorithm 1:** Whole-cell dynamic simulation

---

Initialize simulation states (described in Algorithm 2, 3, 4)

**repeat**

    /\* Allocate shared resources \*/

**for each molecule  $i$  do**

**for each process  $j$  do**

**1.** Calculate demand  $d_{i,j}$  of process  $j$  for molecule  $i$ .

**2.** Divide total count  $c_i$  of molecule  $i$  into partition  $p_{i,j}$ , for each process proportional to the demand such that  $p_{i,j} = c_i \frac{d_{i,j}}{\sum_j d_{i,j}}$ .

    /\* Calculate temporal evolution \*/

**for each process  $j$  do**

**1.** Retrieve partitioned molecules  $p_{i,j}$ .

**2.** Compute the contribution of process  $j$  to the temporal evolution of the partitioned molecules  $\Delta p_{i,j}$ .

**3.** Update partitioned molecule counts  $p_{i,j} = p_{i,j} + \Delta p_{i,j}$ .

    /\* Merge partitioned molecules \*/

**for each molecule  $i$  do**

        Update counts  $c_i$  based on updated partitions computed in each process,

$$c_i = \sum_j p_{i,j}$$

    Increment simulation step by 1

**until** cell division;

**Result:** Whole-cell model is executed for one cell cycle

---

### 1.1.5 Initializing simulations

The state of the *E. coli* simulation is initialized as occurring immediately after cell division. Using the unified parameter set created during Reconstruction and stored in the Knowledge-Base the counts and properties of every species are set using a statistical model to give each simulation a uniquely determined random initial state that, on average, fits experimental data.

**Initializing RNA and protein counts.** The counts of RNA and protein molecules are initialized as follows. First, the total counts of RNA and protein molecules of each species are

computed using Equation 1.

$$M_{total} = \sum_i c_i \cdot MW_i / N_a \quad (1)$$

where  $M_{total}$  is the total mass of RNA or protein,  $c_i$  and  $MW_i$  are the counts and molecular weight of RNA or protein  $i$ , and  $N_a$  is Avogadro's number. The counts of the  $i$ -th RNA or protein can be described as a fraction of the total counts ( $c_{total}$ ) of RNA or protein:  $c_i = c_{total} \cdot f_i$ , where  $f_i$  is the mass fraction of RNA or protein  $i$ . Substituting  $c_i$  in Equation 1 and rearranging gives Equation 2:

$$c_{total} = \frac{M_{total}}{\vec{f} \cdot \vec{MW} / N_a} \quad (2)$$

where  $\vec{f}$  is the distribution of RNA or protein per cell. The total masses of RNA and protein per cell ( $M_{total}$ ) are known from the KnowledgeBase. The RNA distribution  $\vec{f}^{RNA}$  is computed from a reconciliation of the RNA-sequencing dataset measured in this study with the expectation that the expression of RNA polymerases and ribosomes must be sufficient to meet cellular demands (please see the iterative parameter estimation approach described in Section 1.2.2). The protein distribution  $\vec{f}^{protein}$  is computed from  $\vec{f}^{RNA}$  according to the following equation, which is an abbreviated form of the protein equation in Fig. 1 for the  $i$ th protein:

$$\frac{d\text{protein}_i}{dt} = a \cdot \text{mRNA}_i \cdot \psi_i - \left( \frac{\ln 2}{t_{1/2,i}} + \frac{\ln 2}{\tau} \right) \text{protein}_i \quad (3)$$

where  $\text{mRNA}_i$  is the concentration of the  $i$ th mRNA from which protein  $i$  is translated,  $\psi_i$  is the translation efficiency of  $\text{mRNA}_i$ ,  $t_{1/2,i}$  is the half-life of  $\text{protein}_i$ , and  $\tau$  is the doubling time of the cell. The constant  $a$  represents the remaining parameters in the protein equation in Fig. 1 and is assumed to be the same across all protein types. At steady-state,  $\frac{d\text{protein}_i}{dt} = 0$  and  $\text{protein}_i$

can be isolated:

$$\text{protein}_i = \frac{a \cdot \text{mRNA}_i \cdot \psi_i}{\frac{\ln 2}{t_{1/2,i}} + \frac{\ln 2}{\tau}} \quad (4)$$

The protein distribution  $\vec{f}^{protein}$  is obtained from the per-protein expression:

$$\vec{f}^{protein} = \frac{1}{\sum_{i=1}^n \text{protein}_i} \cdot \begin{bmatrix} \text{protein}_1 \\ \text{protein}_2 \\ \vdots \\ \text{protein}_n \end{bmatrix} \quad (5)$$

where  $n$  is the number of protein monomers (4353). Since  $a$  is a constant, the protein distribution expression simplifies to:

$$\vec{f}^{protein} = \text{normalize} \left( \frac{\vec{f}^{RNA} \cdot \vec{\psi}}{\vec{k}_d + \frac{\ln 2}{\tau}} \right) \quad (6)$$

where  $\vec{\psi}$  is the translation efficiency distribution, and  $\vec{k}_d$  is a vector of the protein degradation rates. Total counts and the expected distribution are then used to sample a multinomial distribution to statistically compute the counts of each individual RNA or protein species using Equation 7.

$$\vec{c} = \text{multinomial}(\vec{f}, c_{total}) \quad (7)$$

Details can be found in Algorithm 2.

---

**Algorithm 2:** Initializing counts of RNA and protein

---

**Input :**  $M_{total}^{RNA}$ ,  $M_{total}^{Protein}$  Total mass per cell of RNA and protein

**Input :**  $MW_i$ ,  $MW_j$  Molar molecular weights of RNA  $i = 1$  to  $n_{RNA}$  and protein

$j = 1$  to  $n_{protein}$

**Input :**  $f_i^{RNA}$  mass fraction based on RNA expression of RNA  $i = 1$  to  $n_{RNA}$

**Input :**  $k_{d,j}$  degradation rate of protein  $j = 1$  to  $n_{protein}$

**Input :**  $N_a$  Avogadro's number

**Input :**  $\psi_j$  translational efficiencies of each mRNA  $j = 1$  to  $n_{protein}$

1. Calculate total counts of RNAs ( $C_{total}^{RNA}$ ) based on total RNA mass ( $M_{total}^{RNA}$ ) and distribution of expression ( $\vec{f}^{RNA}$ ) from KnowledgeBase

$$C_{total}^{RNA} = \frac{M_{total}^{RNA}}{\vec{f}^{RNA} \cdot MW / N_a}$$

2. Calculate counts of each RNA ( $\vec{c}_{RNA}$ ) by sampling a multinomial distribution  $C_{total}^{RNA}$  times weighted by the expected distribution of expression ( $\vec{f}^{RNA}$ ).

$$\vec{c}_{RNA} = \text{multinomial}(\vec{f}^{RNA}, C_{total}^{RNA})$$

3. Calculate expected distribution of protein counts ( $\vec{f}^{protein}$ ) based on expected distribution of RNA counts ( $\vec{c}_{RNA}$ ), translational efficiencies ( $\vec{\psi}$ ), protein degradation rates ( $\vec{k}_d$ ), and dilution using a steady state assumption.

$$\vec{f}^{protein} = \frac{\vec{c}_{RNA} \cdot \vec{\psi}}{\vec{k}_d + \frac{\ln(2)}{\tau}}$$

4. Calculate total counts of proteins ( $C_{total}^{protein}$ ) based on total protein mass ( $M_{total}^{protein}$ ) and distribution of counts ( $\vec{f}^{protein}$ ).

$$C_{total}^{protein} = \frac{M_{total}^{protein}}{\vec{f}^{protein} \cdot MW / N_a}$$

5. Calculate counts of each protein ( $\vec{c}_{protein}$ ) by sampling a multinomial distribution  $C_{total}^{protein}$  times weighted by the expected distribution of expression ( $\vec{f}^{protein}$ ).

$$\vec{c}_{protein} = \text{multinomial}(\vec{f}^{protein}, C_{total}^{protein})$$

**Result:** Counts of RNA are set at the beginning of the first generation of simulated cells

---

**Initializing small molecule counts.** The counts of small molecules such as cytoplasmic and membrane constituents are initialized as follows. Expected concentrations of small molecules are either known experimentally, or computed from an FBA biomass reaction (see Section 1.1.6.7) and stored as a reconciled dataset in the KnowledgeBase. The volume of the cell is computed using its mass divided by its density. Therefore adding counts of small molecules to the cell in order to match a concentration will necessarily change the volume of

the cell. To reconcile this inconsistency, the counts of each small molecule are recalculated by equating the following two expressions for total mass of small molecules:

$$\begin{cases} m_s = m_t - m_{ns} \\ m_s = \sum_{i=1}^{n_s} m_i \end{cases} \quad (8)$$

where  $m_s$  is the total mass of small molecules,  $m_t$  is the total mass of the cell,  $m_{ns}$  is the total mass of non-small molecules,  $n_s$  is the total number of small molecule types, and  $m_i$  is the mass of the  $i$ th small molecule type. Since the total mass of the cell  $m_t$  is equal to  $\rho * V$ , where  $\rho$  is the cell density and  $V$  is the cell volume, the first expression can be rewritten as:

$$m_s = \rho * V - m_{ns} \quad (9)$$

The mass of each small molecule type  $m_i$  can be described as:

$$m_i = c_i \cdot V * w_i \quad (10)$$

where  $c_i$  is the concentration and  $w_i$  is the molecular weight of small molecule  $i$ . The two expressions in Equation 8 can be rewritten as:

$$\begin{cases} m_s = \rho * V - m_{ns} \\ m_s = V \cdot (w^T \cdot c) \end{cases} \quad (11)$$

where  $w$  and  $c$  are vectors of length  $n_s$  and describe the molecular weights and concentrations of small molecules respectively. Equating the two expressions in Equation 11 and solving for  $V$  yields:

$$V = \frac{m_{ns}}{\rho - (w^T \cdot c)} \quad (12)$$

which allows the calculation of small molecule counts as described in Algorithm 3.

---

**Algorithm 3:** Initializing counts of small molecules

---

**Input :**  $MW_k$  molecular weight of small molecule  $k = 1$  to  $n_s$

**Input :**  $C_k$  concentration of small molecule  $k = 1$  to  $n_s$

**Input :**  $m_{ns}$  total mass of non-small molecules of the cell (ie. only considering RNA, protein, and DNA)

**Input :**  $\rho$  cell density

**Input :**  $N_a$  Avogadro's number

1. Calculate the total small molecule mass concentration (partial density).

$$\rho_s = \sum_{k=1}^{n_s} MW_k \cdot C_k$$

2. Calculate the new total cell volume that accommodates the small molecule concentrations.

$$V = \frac{m_{ns}}{\rho - \rho_s}$$

3. Calculate the new counts of each small molecule  $k$ .

$$c_k^s = C_k \cdot V \cdot N_a$$

**Result:** Consistent small molecule counts  $c_k^s$

---

**Initializing chromosome state.** In *E. coli* there are potentially multiple rounds of replication proceeding simultaneously at any point in the cell cycle. The simulation begins immediately after cell division and the number and position of any replication forks that are inherited from previous generations must be determined to correctly initialize the simulated cell. The number of origins of replication, replication forks, and their positions are initialized as follows.

First, the number of rounds of replication that on average need to proceed simultaneously can be estimated in an average cell in a population using the length of time required to replicate the chromosome (C period) and the length of time for cytokinesis (D period) as well as the expected doubling time given the environment ( $\tau$ ). The number of simultaneous rounds ( $n_{limit}$ ) can be calculated with Equation 13 as the ratio of C+D period over the doubling time (6).



Because we are considering a specific cell and not an average of a population of cells, the number of rounds of replication needs to be an integer, and we take the floor because a fractional round of chromosome initiation has not yet occurred.

$$n_{limit} = \text{floor}\left(\frac{C + D}{\tau}\right) \quad (13)$$

For every round of replication proceeding there are a pair of replication forks and a pair of origins of replication. We are assuming that on average a cell after division has inherited one chromosome molecule (i.e. no more than one terC), and that it may have more than one round of replication proceeding on it (i.e. number of oriC  $\geq 1$ ). Therefore the number of origins of replication ( $n_{origin}$ ) is defined by Equation 14.

$$n_{origin} = 2^{n_{limit}} \quad (14)$$

Finally, the position between the oriC and the terC of each replication fork needs to be determined on average. This can be calculated with Equation 15 where  $f$  is the fraction of length between the origin and terminus of replication that the replication fork has proceeded for the  $n$ th round of replication.

$$f = 1 - \frac{n \cdot \tau - D}{C} \quad (15)$$

Where  $n$  is every integer value  $1, 2, \dots, n_{limit}$ . The position in nucleotides ( $l$ ) can then be calculated from Equation 16 where  $L$  is the total length of the chromosome in *E. coli*.

$$l = f \cdot \frac{L}{2} \quad (16)$$

Proper initialization of the cell ensures the simulation begins close to the steady state of the system, and in practice the simulation is relatively stable. Perturbations in the ratio of cell mass

to number of origins of replication quickly re-converge to steady state for a given environment. A detailed algorithm for chromosome initialization can be found in Algorithm 4.

---

**Algorithm 4:** Initializing chromosome state

---

**Input :**  $C$  length of C period

**Input :**  $D$  length of D period

**Input :**  $\tau$  expected doubling time

**Input :**  $L$  length of chromosome in nucleotides

$$n_{limit} = \text{floor}\left(\frac{C+D}{\tau}\right)$$

$n = 1$  **while**  $n \leq n_{limit}$  **do**

1. Determine initial number of forward and reverse replication forks ( $n_{fork,f,init}$  and  $n_{fork,r,init}$ ) for the given round of replication

$$n_{fork,f,init} = 2^{n-1}$$

$$n_{fork,r,init} = 2^{n-1}$$

2. Determine position of each fork on forward and reverse strand as a fraction of total chromosome length ( $f$ )

$$f = 1 - \frac{n \cdot \tau - D}{C}$$

3. Calculate position of each fork on forward and reverse strand ( $l$ ) in nucleotides and initialize  $n_{fork,f,init}$  and  $n_{fork,r,init}$  DNA polymerases at the calculated positions

$$l_{fork,f,init} = f \cdot \frac{L}{2}$$

$$l_{fork,r,init} = f \cdot \frac{L}{2}$$

4. Increment round of replication that is being initialized

$$n = n + 1$$

$$n_{origin,init} = 2^{n_{limit}}$$

**Result:** State of chromosome in cell is correctly initialized as the average of a population

---

**Environments.** The model can simulate log-phase growth in three different environments - M9 minimal media with glucose, M9 minimal media with glucose supplemented with amino acids (5x Supplement EZ without VA Vitamin Solution), and M9 minimal media with glucose without oxygen - which map to three different growth rates (doubling times of: 44 minutes, 25 minutes, and 100 minutes, respectively) to demonstrate the ability to shift cell composition. Metabolites included in these environments are glucose, oxygen, ammonium,  $\text{Na}^+$ ,  $\text{PI}$ ,  $\text{K}^+$ , sulfate,  $\text{Fe}^{2+}$ ,  $\text{Ca}^{2+}$ ,  $\text{Cl}^-$ ,  $\text{Co}^{2+}$ ,  $\text{Mg}^{2+}$ ,  $\text{Mn}^{2+}$ ,  $\text{Ni}^{2+}$ ,  $\text{Zn}^{2+}$ , water,  $\text{CO}_2$ , MOPS, L-selenocysteine,

glucose-D-lactone, cytosine, and the 20 amino acids. Please see Section 1.3.1 for detailed media conditions. In benchmarking our simulations, we also simulated environments that would activate and inactivate each of the transcription factors (not shown).

Exchange flux bounds for the metabolic network are either added or removed based on the presence of metabolites in the simulated media (see Section 1.1.6.7). The files specifying these bounds can be found in the repository (`wcEcoli/reconstruction/ecoli/flat/condition/nutrient/`). Based on these bounds, the Metabolism process updates cellular concentrations of small molecules, and the Transcription and Translation processes modulate the activities and expression of RNA polymerases and ribosomes to globally shift cell composition. The transcriptional regulatory network (see Section 1.1.6.2) responds to the new small molecule concentrations and adjusts gene expression appropriately.

### **1.1.6 Processes**

The Processes of the *E. coli* model span several major areas of cellular physiology. Each process is a computational representation of chemical reactions or transformations grouped by a physiological function. In this section, the processes are ordered according to their association with the following groups of cellular function: Central Dogma, Metabolism, and Balanced Growth. We modeled Processes using the most appropriate mathematics for their individual network topology and degree of experimental characterization. The inputs and outputs of each Process are the counts of metabolites or macromolecules and the catalytic capacity or configuration of the enzymes that catalyze the reactions in each Process. This section details the model implementation, computational algorithm, associated data, and relevant code for each Process. Some of the data values for these processes are noted with “See GitHub” indicating that they are tabulated or calculated in files in our GitHub repository under `wcEcoli/reconstruction/ecoli/`.

### 1.1.6.1 Transcription

**Model implementation.** The *E. coli* model assumes RNA polymerase exists in two states: free and actively transcribing. Every time step, free RNA polymerase transitions to the actively transcribing state to maintain an experimentally-observed active fraction of RNA polymerase. This is a simplification compared to *M. genitalium* model, which modeled RNA polymerase as existing in 4 states: free, non-specifically bound on a chromosome, bound to a promoter, and actively transcribing a gene. The *E. coli* model does not yet include sigma, elongation or termination factors. The *E. coli* model also currently treats each gene as its own transcription unit. Transcription occurs through the action of two processes in the model: TranscriptInitiation (Algorithm 5) and TranscriptElongation (Algorithm 6).

**Initiation.** TranscriptInitiation models the binding of RNA polymerase to each gene. The number of initiation events per gene is determined in a probabilistic manner and dependent on the number of free RNA polymerases and each gene's synthesis probability. The number of RNA polymerases to activate in each time step is determined such that the average fraction of RNA polymerases that are active throughout the simulation matches measured fractions, which are dependent on the cellular growth rate. This is done by assuming a steady state concentration of active RNA polymerases (and therefore a constant active fraction):

$$\frac{dR_{act}}{dt} = p_{act} \cdot R_{free} - r \cdot R_{act} = 0 \quad (17)$$

$$p_{act} = \frac{r \cdot R_{act}}{R_{free}} \quad (18)$$

where  $R_{act}$  is the concentration of active RNA polymerases,  $R_{free}$  is the concentration of free RNA polymerases,  $p_{act}$  is the activation probability and  $r$  is the expected termination rate for active RNA polymerases. Using the definition of the active fraction,  $f_{act} = \frac{R_{act}}{R_{act} + R_{free}}$ ,  $p_{act}$  can

be defined in terms of the desired active fraction:

$$p_{act} = \frac{r \cdot f_{act}}{1 - f_{act}} \quad (19)$$

This activation probability is then used to determine how many free RNA polymerases will initiate. These newly initiated RNA polymerases are distributed to individual genes based on the synthesis probability for each gene, which is determined based on another steady state assumption for each mRNA concentration:

$$\frac{dm_i}{dt} = v_{synth,i} - m_i \cdot \left( \frac{\ln 2}{\tau} + \frac{\ln 2}{t_{\frac{1}{2},i}} \right) = 0 \quad (20)$$

$$v_{synth,i} = m_i \cdot \left( \frac{\ln 2}{\tau} + \frac{\ln 2}{t_{\frac{1}{2},i}} \right) \quad (21)$$

where  $v_{synth,i}$  is the synthesis rate of each mRNA,  $m_i$  is the concentration of each mRNA,  $\tau$  is the doubling time and  $t_{\frac{1}{2},i}$  is the half life for each mRNA (see Section 1.1.6.3). Using RNA expression data for  $m_i$ , the rate of synthesis for each gene can be determined. Synthesis rates are then normalized as below to determine a synthesis probability for each gene:

$$p_{synth,i} = \frac{v_{synth,i}}{\sum_j v_{synth,j}} \quad (22)$$

where  $p_{synth,i}$  is the synthesis probability for each gene. Gene synthesis probabilities are further dependent on transcription factor binding and regulation as discussed in the next section (Section 1.1.6.2).

**Elongation.** TranscriptElongation models nucleotide polymerization into RNA molecules by RNA polymerases. Polymerization occurs across all polymerases simultaneously and resources are allocated to maximize the progress of all polymerases up to the limit of the expected polymerase elongation rate and available nucleotides. The termination of RNA elongation oc-

curs once a RNA polymerase has reached the end of the annotated gene.

---

**Algorithm 5:** RNA polymerase initiation on DNA

---

- Input :**  $f_{act}$  fraction of RNA polymerases that are active  
**Input :**  $r$  expected termination rate for active RNA polymerases  
**Input :**  $p_{synth,i}$  RNA synthesis probability for each gene where  $i = 1$  to  $n_{gene}$   
**Input :**  $c_{RNAP,f}$  count of free RNA polymerase  
**Input :** multinomial() function that draws samples from a multinomial distribution
1. Calculate probability ( $p_{act}$ ) of a free RNA polymerase binding to a gene.  
$$p_{act} = \frac{r \cdot f_{act}}{1 - f_{act}}$$
  2. Calculate the number of RNA polymerases that will bind and activate ( $c_{RNAP,b}$ ).  
$$c_{RNAP,b} = p_{act} \cdot c_{RNAP,f}$$
  - 3 Sample multinomial distribution  $c_{RNAP,b}$  times weighted by  $p_{synth,i}$  to determine which genes receive a RNA polymerase and initiate ( $n_{init,i}$ ).  
$$n_{init,i} = \text{multinomial}(c_{RNAP,b}, p_{synth,i})$$
  - 4 Assign  $n_{init,i}$  RNA polymerases to gene  $i$ . Decrement free RNA polymerase counts.
- Result:** RNA polymerases bind to genes based on the number of free RNA polymerases and the synthesis probability for each gene.
-

---

**Algorithm 6:** mRNA elongation and termination

---

**Input :**  $e$  expected RNA polymerase elongation rate in given environment

**Input :**  $L_i$  length of each gene  $i = 1$  to  $n_{gene}$  for each coding gene.

**Input :**  $p_j$  gene position of RNA polymerase  $j = 1$  to  $n_{RNAP}$

**Input :**  $c_{nt,k}$  counts of nucleotides  $k = 1$  to 4 for each nucleotide type (A, C, G, U)

**Input :**  $\Delta t$  length of current time step

/\* Elongate RNA transcripts up to limits of sequence or nucleotides \*/

**for each RNA polymerase  $j$  on gene  $i$  do**

1. Based on RNA polymerase position  $p_j$  on a gene  $i$  and maximal elongation rate  $e$  determine “stop condition” ( $s_j$ ) for RNA polymerase  $j$  assuming no nucleotide limitation.

$$s_j = \min(p_j + e \cdot \Delta t, L_i)$$

Stop condition is either maximal elongation rate scaled by the time step or the full length of sequence (i.e. the RNA polymerase will terminate in this time step).

2. Derive sequence between RNA polymerase position ( $p_j$ ) and stop condition ( $s_j$ ).

3. Based on derived sequence calculate the number of nucleotides required to polymerize sequence  $c_{nt,k}^{req}$ .

4. Elongate up to limits:

**if** all( $c_{nt,k}^{req} < c_{nt,k}$ ) **then**

Update the position of each polymerase to stop position

$$p_j = s_j$$

**else**

4a. Attempt to elongate all RNA fragments.

4b. Update position of each polymerase to maximal position given the limitation of  $c_{nt,k}$ .

5. Update counts of  $c_{nt,k}$  to reflect polymerization usage.

/\* Terminate RNA polymerases that have reached the end of their gene \*/

**for each RNA polymerase  $j$  on gene  $i$  do**

**if**  $p_j == L_i$  **then**

1. Increment count of RNA that corresponds to elongating RNA transcript that has terminated.

2. Increment free RNA polymerase counts.

**Result:** Each RNA transcript is elongated up to the limit of available gene sequence, expected elongation rate, or nucleotide limitation. RNA polymerases that reach the end of their genes are terminated and released.

---

### Associated data

| Parameter                 | Symbol      | Units | Value        | Reference  |
|---------------------------|-------------|-------|--------------|------------|
| Active fraction of RNAP   | $f_{act}$   | -     | [0.17, 0.30] | (7)        |
| RNA synthesis probability | $p_{synth}$ | -     | [0, 0.015]   | See GitHub |
| RNAP elongation rate      | $e$         | nt/s  | [39, 55]     | (7)        |

Table 1: Table of parameters for Transcript Initiation and Elongation processes.

### Associated files

| wcEcoli Path                                     | File                              | Type     |
|--------------------------------------------------|-----------------------------------|----------|
| wcEcoli/models/ecoli/processes                   | transcript_initiation.py          | process  |
| wcEcoli/models/ecoli/processes                   | transcript_elongation.py          | process  |
| wcEcoli/reconstruction/ecoli/dataclasses/process | transcription.py                  | data     |
| wcEcoli/reconstruction/ecoli/flat                | rnas.tsv                          | raw data |
| wcEcoli/reconstruction/ecoli/flat                | growthRateDependentParameters.tsv | raw data |

Table 2: Table of files for transcription.

#### 1.1.6.2 Transcription regulation

**Model implementation.** There are two aspects to modeling transcriptional regulation: (1) modeling the activation or inhibition of a transcription factor (e.g., by a ligand), and (2) given an active transcription factor, modeling its effect on RNA polymerase recruitment to a promoter site. The enhanced coverage of the regulatory network - 438 regulatory interactions described by 22 transcription factors that regulate 355 genes - is a significant difference from the *M. genitalium* model. To incorporate this network, regulation is represented by three different classes of transcription regulators: zero-component systems, one-component systems and two-component systems.

**Modeling transcription factor activation.** We consider three classes of transcription factors based on their mechanism of activation:

1. **Zero-component systems:** transcription factors that are considered to be active whenever they are expressed. Examples include the Fis and Hns proteins. These two proteins,



for instance, are important in maintaining higher-order DNA structure and likely have complex feedback loops modulating their activity. Because this complexity is not yet fully understood, we make the simplifying assumption that these proteins are always active unless they are knocked out. Zero-component systems are modeled in the Tfbinding process in the model, which handles transcription factor binding to promoters.

2. **One-component systems:** transcription factors that are directly activated or inhibited by a small molecule ligand. Examples of this class include the repressor TrpR which binds tryptophan, and the inducer AraC which binds arabinose. One-component systems are modeled in the Tfbinding and Equilibrium processes in the model, which handle transcription factor binding to promoters and transcription factor binding to ligands, respectively.
3. **Two-component systems:** transcription factors that are paired with a separate sensing protein that responds to an environmental stimulus (these are simple analogs to the vast, complicated signaling networks that exist in eukaryotic cells). The sensing protein phosphorylates the cognate transcription factor in a condition-dependent fashion. Examples include ArcA which is phosphorylated by its cognate ArcB in anaerobic conditions, and NarL which responds to the presence of nitrate when phosphorylated by its cognate sensor NarX. Two-component systems are modeled in the Tfbinding, Equilibrium, and TwoComponentSystems processes in the model, which handle transcription factor binding to promoters, transcription factor binding to ligands, and phosphotransfer reactions of signaling pathways, respectively.

**Zero-component systems.** We assume all transcription factors of this class will bind to available promoter sites.

**One-component systems.** For a transcription factor with concentration  $T$  whose activity is directly modulated by a ligand with concentration  $L$  that binds with stoichiometry  $n$ , we assume that the two species achieve equilibrium on a short time scale and that the affinity of the two molecules can be described by a dissociation constant  $K_d$ :

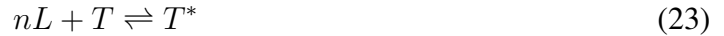

where  $T^*$  represents the concentration of the ligand-bound transcription factor.

With the dissociation constant  $K_d$  defined as:

$$K_d = \frac{L^n \cdot T}{T^*} \quad (24)$$

we have:

$$\frac{T^*}{T_T} = \frac{L^n}{L^n + K_d} \quad (25)$$

where  $T_T$  is the total concentration of the transcription factor, both ligand-bound and unbound. As we can see, the fraction of bound transcription factor is a function of ligand concentration and the dissociation constant. Importantly, if the ligand concentration is (approximately) constant over time, the fraction of bound transcription factor is (approximately) constant over time.

To computationally simulate this model we start with total counts of free transcription factor and ligand, completely dissociated from one another. We then form one molecule of the ligand-TF complex at a time and evaluate how close the ratio of  $L^n \cdot T/T^*$  is to the actual  $K_d$ . We select the values of  $L$ ,  $T$  and  $T^*$  that minimize the absolute difference between  $K_d$  and  $L^n \cdot T/T^*$  (see Algorithm 7).

**Two-component systems.** For a transcription factor with concentration  $T$ ; a cognate sensing protein with concentration  $S$ ; a ligand with concentration  $L$ ; subscripts  $f$  denoting a free

(unbound) form of a molecule,  $b$  denoting a ligand-bound form of a molecule, and  $p$  denoting a phosphorylated form of a molecule; and  $ATP$ ,  $ADP$ ,  $H^+$ , and  $H_2O$  denoting concentrations of these molecules, we propose a system with the following:

Free (unbound) cognate sensing protein at equilibrium with ligand-bound cognate sensing protein, described by dissociation constant  $K_d$ :

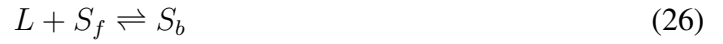

The autophosphorylation of a free (unbound) cognate sensing protein at a rate  $k_A$ :

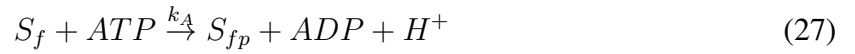

The autophosphorylation of a ligand-bound cognate sensing protein at a rate  $k_B$ :

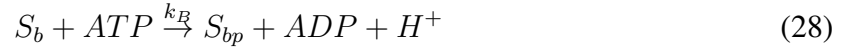

The phosphorylation of a transcription factor by its free, phosphorylated cognate sensing protein at a rate  $k_C$ :

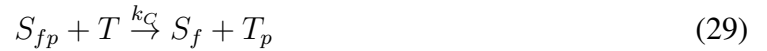

The phosphorylation of a transcription factor by its bound, phosphorylated cognate sensing protein at a rate  $k_D$ :

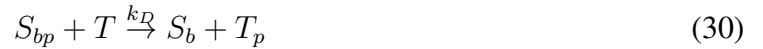

The auto-phosphatase activity of a transcription factor at a rate  $k_E$ :

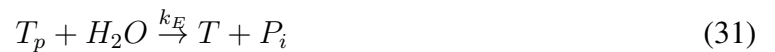

Ligand binding is simulated in a fashion identical to the one-component systems. By assuming mass-action kinetics, we can represent the rest of this system mathematically using ordinary differential equations:

$$\frac{dS_f}{dt} = -k_A \cdot S_f \cdot ATP + k_C \cdot S_{fp} \cdot T \quad (32)$$

$$\frac{dS_b}{dt} = -k_B \cdot S_b \cdot ATP + k_D \cdot S_{bp} \cdot T \quad (33)$$

$$\frac{dT}{dt} = -k_C \cdot S_{fp} \cdot T - k_D \cdot S_{bp} \cdot T + k_E \cdot T_p \cdot H_2O \quad (34)$$

$$\frac{dS_{fp}}{dt} = -\frac{dS_f}{dt} \quad (35)$$

$$\frac{dS_{bp}}{dt} = -\frac{dS_b}{dt} \quad (36)$$

$$\frac{dT_p}{dt} = -\frac{dT}{dt} \quad (37)$$

This system of equations is simulated using a numerical ODE integrator (see Algorithm 8).

**Modeling the modulation of RNA polymerase recruitment.** After modeling transcription factor activation, we need to model the probability that the transcription factor is bound to DNA,  $p_T$ , and, when the transcription factor is DNA-bound, its effect on RNA polymerase recruitment to the promoter site,  $\Delta r$  (see Algorithm 9). Recalling the notation used in the *Transcription* section (Algorithm 5), we want to modulate the  $j^{th}$  entry in the  $v_{\text{synth}}$  vector of RNA polymerase initiation probabilities such that:

$$v_{\text{synth},j} = \alpha_j + \sum_i p_{T,i} \Delta r_{ij} \quad (38)$$

where  $\alpha_j$  represents basal recruitment of RNA polymerase and the second term is dependent on transcription factor activity: the probability that the  $i^{th}$  transcription factor is DNA-bound is  $p_{T,i}$ , and the recruitment effect of the  $i^{th}$  transcription factor on the  $j^{th}$  gene is  $\Delta r_{ij}$ . The  $\alpha$  and

$\Delta r$  values are computed prior to simulation based on gene expression values from conditions that modulate transcription factor activity. Values for  $p_T$  are calculated as described in Table 3.

| Transcription factor type | Promoter-bound probability              |
|---------------------------|-----------------------------------------|
| Zero-component system     | $p_T = 1$ if TF is present, 0 otherwise |
| One-component system      | $p_T = (T^*) / (T^* + T)$               |
| Two-component system      | $p_T = (T_p) / (T_p + T)$               |

Table 3: Formulas used to compute the probability that a transcription factor is promoter-bound.  $T^*$  is the active form of a one-component system transcription factor, while  $T_p$  is the phosphorylated form of a two-component system transcription factor, and  $T$  is the inactive or unphosphorylated form of a transcription factor.

---

**Algorithm 7:** Equilibrium binding

---

**Input :**  $c_m$  counts of molecules where  $m = 1$  to  $n_{molecules}$

**Input :**  $S$  matrix describing reaction stoichiometries where  $S[i, j]$  describes the coefficient for the  $i^{th}$  molecule in the  $j^{th}$  reaction

**Input :**  $reactants_j$  set of indices for  $c_m$  of reactant molecules that participate in the  $j^{th}$  reaction

**Input :**  $product_j$  index for  $c_m$  of the product molecule formed by the  $j^{th}$  reaction

**Input :**  $f$  conversion factor to convert molecule counts to concentrations

**Input :**  $K_{d,j}$  dissociation constant where  $j = 1$  to  $n_{reactions}$

1. Dissociate all complexes in  $c$  into constituent molecules to get total reactants ( $d$ ) since some reactants participate in multiple reactions:

$$d = c$$

**for each ligand-binding reaction,  $j$  do**

**for each molecule,  $i$  do**

$$\quad \lfloor d_i = d_i + c_{product_j} \cdot S[i, j]$$

$$\quad \lfloor d_{product_j} = 0$$

2. Find the number of reactions to perform ( $n_j$ ) to minimize the distance from  $K_{d,j}$ , where  $r$  is a positive integer and not greater than the total products that can be formed by the reactants:

**for each ligand-binding reaction,  $j$  do**

$$\quad \lfloor n_j = \operatorname{argmin}_r \left| \frac{\prod_{i \in \text{reactants}_j} (f \cdot (d_i - r))^{S[i, j]}}{f \cdot r} - K_{d,j} \right|$$

3. Update counts ( $c$ ) based on number of reactions that will occur. Starting from the dissociated counts, reactants will decrease by the number of reactions and their stoichiometry and one product will be formed for each reaction.

$$c = d$$

**for each ligand-binding reaction,  $j$  do**

**for each molecule in reactants $_j$ ,  $i$  do**

$$\quad \lfloor c_i = c_i - S[i, j] \cdot n_j$$

$$\quad \lfloor c_{product_j} = n_j$$

**Result:** Ligands are bound to or unbound from their binding partners in a fashion that maintains equilibrium.

---

---

**Algorithm 8:** Two-component systems

---

**Input :**  $\Delta t$  length of current time step

**Input :**  $c_m$  counts of molecules where  $m = 1$  to  $n_{molecules}$

**Input :**  $k_A$  rate of phosphorylation of free histidine kinase

**Input :**  $k_B$  rate of phosphorylation of ligand-bound histidine kinase

**Input :**  $k_C$  rate of phosphotransfer from phosphorylated free histidine kinase to response regulator

**Input :**  $k_D$  rate of phosphotransfer from phosphorylated ligand-bound histidine kinase to response regulator

**Input :**  $k_E$  rate of dephosphorylation of phosphorylated response regulator

**Input :** solveToNextTimeStep() function that solves two-component system ordinary differential equations to the next time step and returns the change in molecule counts ( $\Delta c_m$ )

1. Solve the ordinary differential equations describing phosphotransfer reactions to perform reactions to the next time step ( $\Delta t$ ) using  $c_m, k_A, k_B, k_C, k_D$  and  $k_E$ .

$$\Delta c_m = \text{solveToNextTimeStep}(c_m, k_A, k_B, k_C, k_D, k_E, \Delta t)$$

2. Update molecule counts.

$$c_m = c_m + \Delta c_m$$

**Result:** Phosphate groups are transferred from histidine kinases to response regulators and back in response to counts of ligand stimulants.

---

---

**Algorithm 9:** Transcription factor binding

---

**Input :**  $c_a^i$  counts of active transcription factors where  $i = 1$  **to**  $n_{\text{transcription factors}}$   
**Input :**  $c_i^i$  counts of inactive transcription factors where  $i = 1$  **to**  $n_{\text{transcription factors}}$   
**Input :**  $P_i$  list of promoter sites for each transcription factor where  $i = 1$  **to**  $n_{\text{transcription factors}}$   
**Input :**  $t_i$  type of transcription factor (either one of two-component, one-component, or zero-component) where  $i = 1$  **to**  $n_{\text{transcription factors}}$   
**Input :** randomChoice() function that randomly samples elements from an array without replacement  
**for each transcription factor,  $i$  do**  
    **if active transcription factors are present then**  
        **1.** Compute probability  $p$  of binding the target promoter.  
        **if  $t_i$  is zero-component transcription factor then**  
            transcription factor present  $\rightarrow p_T = 1$   
            transcription factor not present  $\rightarrow p_T = 0$   
        **else**  
            
$$p_T = \frac{c_a^i}{c_a^i + c_i^i}$$
  
        **2.** Distribute transcription factors to gene targets.  
             $P_i^{\text{bound}} = \text{randomChoice}(\text{from } P_i \text{ sample } p_T \cdot \text{len}(P_i) \text{ elements})$   
        **3.** Decrement counts of free transcription factors.

**Result:** Activated transcription factors are bound to their gene targets.

---



### Associated data

| Parameter                                    | Symbol          | Units                  | Value          | Reference  |
|----------------------------------------------|-----------------|------------------------|----------------|------------|
| Ligand::TF dissociation constant             | $k_d = k_r/k_f$ | $\mu\text{M}$          | [2e-15, 5e3]   | See GitHub |
| Free HK phosphorylation rate                 | $k_A$           | $\mu\text{M}/\text{s}$ | [1e-4, 5e2]    | See GitHub |
| Ligand::HK phosphorylation rate              | $k_B$           | $\mu\text{M}/\text{s}$ | 1.7e5          | See GitHub |
| Phosphotransfer rate from free HK-P to TF    | $k_C$           | $\mu\text{M}/\text{s}$ | 1e8            | See GitHub |
| Phosphotransfer rate from ligand::HK-P to TF | $k_D$           | $\mu\text{M}/\text{s}$ | 1e8            | See GitHub |
| Dephosphorylation rate of TF-P               | $k_E$           | $\mu\text{M}/\text{s}$ | 1e-2           | See GitHub |
| DNA::TF dissociation constant                | $K_d$           | pM                     | [2e-4, 1.1e5]  | See GitHub |
| Promoter sites                               | $n$             | targets per chromosome | [1, 108]       | See GitHub |
| Fold-change gene expression                  | $FC$            | $\log_2(a.u.)$         | [-10.48, 9.73] | See GitHub |

Table 4: Table of parameters for equilibrium binding, two-component systems, and transcription factor binding Processes. HK: histidine kinase, TF: transcription factor, HK-P: phosphorylated histidine kinase, TF-P: phosphorylated transcription factor. Note in this and future tables we reference the source code for our model, which will be freely available at GitHub as noted in the main text.

### Associated files

| wcEcoli Path                                     | File                            | Type     |
|--------------------------------------------------|---------------------------------|----------|
| wcEcoli/models/ecoli/processes                   | equilibrium.py                  | process  |
| wcEcoli/models/ecoli/processes                   | tf.binding.py                   | process  |
| wcEcoli/models/ecoli/processes                   | two.component.system.py         | process  |
| wcEcoli/reconstruction/ecoli/dataclasses/process | equilibrium.py                  | data     |
| wcEcoli/reconstruction/ecoli/dataclasses/process | transcription_regulation.py     | data     |
| wcEcoli/reconstruction/ecoli/dataclasses/process | two.component.system.py         | data     |
| wcEcoli/reconstruction/ecoli/flat                | equilibriumReactions.tsv        | raw data |
| wcEcoli/reconstruction/ecoli/flat                | foldChanges.tsv                 | raw data |
| wcEcoli/reconstruction/ecoli/flat                | tfIds.tsv                       | raw data |
| wcEcoli/reconstruction/ecoli/flat                | tfOneComponentBound.tsv         | raw data |
| wcEcoli/reconstruction/ecoli/flat                | twoComponentSystems.tsv         | raw data |
| wcEcoli/reconstruction/ecoli/flat                | twoComponentSystemTemplates.tsv | raw data |

Table 5: Table of files for transcription regulation.

### 1.1.6.3 RNA degradation

**Model Implementation.** The *E. coli* model provides a more detailed, mechanistic representation of RNA degradation compared to the *M. genitalium* model. Unlike the previous model, the gene functionality of endoRNase and exoRNase is mechanistically integrated to evaluate: (1) rates of RNA degradation due to endo-nucleolytic cleavage, and (2) rates of nucleotides digested by exoRNases. These mechanisms are implemented in the RnaDegradation process (detailed in Algorithm 10).

**Endo-nucleolytic Cleavage.** RNAs are cleaved by nine different endoRNases, each of which are assumed to have the same rate of cleavage but can have a different specificity for cleavage of mRNAs, tRNAs or rRNAs. The rate of cleavage for each RNA is determined with a Michaelis-Menten kinetic equation:

$$r_i = k_{cat,endo} \cdot c_{endo,i} \cdot f_i \quad (39)$$

where  $i$  indicates the RNA from each gene,  $r_i$  is the rate of cleavage of each RNA species,  $k_{cat,endo}$  is the rate of cleavage for a single endoRNase,  $c_{endo,i}$  is the count of endoRNases specific to each RNA species, and  $f_i$  is the saturation of endoRNases for each RNA and is defined:

$$f_i = \frac{\frac{c_{RNA,i}}{K_{M,i}}}{1 + \sum_j \frac{c_{RNA,j}}{K_{M,j}}} \quad (40)$$

where  $c_{RNA,i}$  is the count of each RNA and  $K_{M,i}$  is the Michaelis constant for each RNA,  $i$ . The saturation fraction accounts for competitive binding of each RNA species for the available endoRNases. The Michaelis constant for each RNA is determined by setting Eq. 39 equal to the first order approximation based on measured (or assumed, if measurement data is not available)

RNA half lives:

$$k_{cat,endo} \cdot c_{endo,i} \cdot \frac{\frac{c_{RNA,i}}{K_{M,i}}}{1 + \sum_j \frac{c_{RNA,j}}{K_{M,j}}} = \frac{\ln 2}{\tau_{RNA,i}} \cdot c_{RNA,i} \quad (41)$$

where  $\tau_{RNA,i}$  is the half life for each RNA. Expected counts of endoRNases and RNA transcripts for an average cell are used to solve the non-linear equation for each  $K_{M,i}$ .

During simulations, individual RNA counts are low so  $r_i$  from Eq. 39 would be very low ( $\ll 1$ ) for most RNA. To get integer counts to degrade within a timestep, the total number of RNAs expected to be degraded is first determined. Then, samples are drawn from a multinomial distribution of available RNAs to degrade until this total is reached. This is done separately for each RNA group (mRNA, tRNA and rRNA) based on the known endoRNase affinity for each group:

$$R_{endo,group} = \sum_{i \in group} r_i \cdot \Delta t \quad (42)$$

where  $r_i$  is as defined in Eq. 39,  $\Delta t$  is the length of the simulation timestep, and  $i \in group$  means that the RNA is in a specific RNA group (mRNA, tRNA or rRNA). The multinomial distribution for each RNA to degrade is sampled with a probability for each RNA species based on the saturated fraction of that species:

$$p_{deg,group,i} = \frac{f_i \cdot \mathbf{1}_{i \in group}}{\sum_{j \in group} f_j} \quad (43)$$

where  $\mathbf{1}_{i \in group}$  is an indicator function that is 1 if  $i$  is in  $group$  and 0 otherwise.

**Exo-nucleolytic Digestion.** Endo-nucleolytic cleavage produces non-functional RNA fragments, which are then degraded to individual nucleotides via nine different exoRNases. Once degraded, these nucleotides can be recycled by the Metabolism process. ExoRNase capacity is determined as the following:

$$R_{exo} = k_{cat,exo} \cdot c_{exo} \cdot \Delta t \quad (44)$$

where  $R_{exo}$  is the exoRNase digestion capacity,  $k_{cat,exo}$  is the rate of cleavage for a single exoRNase,  $c_{exo}$  is the total count of exoRNases, and  $\Delta t$  is the length of the simulation timestep. Since non-functional RNA fragments are modeled in aggregate and not individually like functional RNA molecules, we do not include a  $K_M$  term for the digestion capacity and assume full saturation.

---

**Algorithm 10:** RNA degradation: endo-nucleolytic cleavage and exo-nucleolytic digestion

---

**Input :**  $K_{M,i}$  Michaelis constants of each mRNA transcript binding to endoRNases  
 where  $i = 1$  to  $n_{RNA}$

**Input :**  $k_{cat,endo}, k_{cat,exo}$  catalytic rate of endoRNase and exoRNase

**Input :**  $c_{endo}, c_{exo}$  count of endoRNases and exoRNases

**Input :**  $c_{frag,i}$  count of nucleotides in non-functional RNA fragments where  $i = 1$  to 4  
 for AMP, CMP, GMP, UMP

**Input :**  $c_{nt,i}$  count of free nucleotides where  $i = 1$  to 4 for AMP, CMP, GMP, UMP

**Input :**  $c_{mRNA}, c_{tRNA}, c_{rRNA}$  count of each mRNA, tRNA and rRNA

**Input :**  $c_{H_2O}, c_{PPi}, c_{proton}$  count of small molecules

**Input :** multinomial() function that draws samples from a multinomial distribution

**Input :** countNTs() function that returns counts of AMP, CMP, GMP, and UMP for a  
 given non-functional RNA fragment

**Input :** lengthFragments() function that returns the total number of bases of all RNA  
 fragments

/\* Endo-nucleolytic cleavage \*/

1. Calculate fraction of active endoRNases ( $f_i$ ) that target each RNA where  $i = 1$  to

$n_{gene}$

$$f_i = \frac{\frac{c_{RNA,i}}{K_{M,i}}}{1 + \sum_j \frac{c_{RNA,j}}{K_{M,j}}}$$

2. Calculate total counts of RNAs to be degraded ( $R_{endo,group}$ )

$$R_{endo,mRNA} = \sum_{i \in mRNA} k_{cat,endo} \cdot c_{endo,i} \cdot f_i \cdot \Delta t$$

$$R_{endo,tRNA} = \sum_{i \in tRNA} k_{cat,endo} \cdot c_{endo,i} \cdot f_i \cdot \Delta t$$

$$R_{endo,rRNA} = \sum_{i \in rRNA} k_{cat,endo} \cdot c_{endo,i} \cdot f_i \cdot \Delta t$$

3. Determine probabilities for multinomial distributions of RNAs to degrade for each  
 RNA group ( $p_{deg,group,i}$ )

$$p_{deg,mRNA,i} = \frac{f_i \cdot \mathbf{1}_{i \in mRNA}}{\sum_{j \in mRNA} f_j}$$

$$p_{deg,tRNA,i} = \frac{f_i \cdot \mathbf{1}_{i \in tRNA}}{\sum_{j \in tRNA} f_j}$$

$$p_{deg,rRNA,i} = \frac{f_i \cdot \mathbf{1}_{i \in rRNA}}{\sum_{j \in rRNA} f_j}$$

4. Sample multinomial distributions for each group  $R_{endo,group}$  times, with probability  
 determined by relative endoRNase saturation, to determine counts of RNAs that are  
 converted into non-functional RNAs ( $d_i$ )

$$d_i = \text{multinomial}(R_{endo,mRNA}, p_{deg,mRNA,i}) \\
+ \text{multinomial}(R_{endo,tRNA}, p_{deg,tRNA,i}) \\
+ \text{multinomial}(R_{endo,rRNA}, p_{deg,rRNA,i})$$


---

---

**5.** Increase number of RNA fragments. Decrease RNA and water counts by amount required for RNA hydrolysis and increase pyrophosphate counts for the removal of the 5' pyrophosphate

$$c_{frag} = c_{frag} + \text{countNTs}(d_i)$$

$$c_{RNA,i} = c_{RNA,i} - d_i$$

$$c_{H_2O} = c_{H_2O} - \sum_i d_i$$

$$c_{PPi} = c_{PPi} + \sum_i d_i$$

/\* Exo-nucleolytic digestion \*/

**6.** Compute exoRNase capacity ( $R_{exo}$ )

$$R_{exo} = k_{cat,exo} \cdot c_{exo} \cdot \Delta t$$

**if**  $R_{exo} > \sum c_{frag,i}$  **then**

Update nucleotide, water and proton counts

$$c_{nt,i} = c_{nt,i} + c_{frag,i}$$

$$c_{H_2O} = c_{H_2O} - \text{lengthFragments}(c_{frag})$$

$$c_{proton} = c_{proton} + \text{lengthFragments}(c_{frag})$$

Set counts of RNA fragments equal to zero ( $c_{frag,i} = 0$ )

**else**

Sample multinomial distribution  $c_{frag}$  with equal probability to determine which fragments are exo-digested ( $c_{frag,dig}$ ) and recycled

$$c_{frag,dig,i} = \text{multinomial}(R_{exo}, \frac{c_{frag,i}}{\sum_i c_{frag,i}})$$

Update nucleotide, water, proton counts, and RNA fragments

$$c_{nt,i} = c_{nt,i} + c_{frag,dig,i}$$

$$c_{H_2O} = c_{H_2O} - \text{lengthFragments}(c_{frag,dig})$$

$$c_{proton} = c_{proton} + \text{lengthFragments}(c_{frag,dig})$$

$$c_{frag,i} = c_{frag,i} - c_{frag,dig,i}$$

**Result:** RNAs are selected and degraded by endoRNases, and non-functional RNA fragments are digested through exoRNases. During the process water is consumed, and nucleotides, pyrophosphate and protons are released.

---

### Associated data

| Parameter                            | Symbol                          | Units         | Value                            | Reference  |
|--------------------------------------|---------------------------------|---------------|----------------------------------|------------|
| EndoRNase catalytic rate             | $k_{cat,endo}$                  | RNA counts/s  | 0.10                             | See GitHub |
| ExoRNase catalytic rate              | $k_{cat,exo}$                   | nt digested/s | 50                               | See GitHub |
| mRNA half-lives <sup>(1)</sup>       | $\tau_{mRNA}$                   | min           | [1.30, 31.40]                    | (8)        |
| tRNA, rRNA half-lives                | $\tau_{tRNA},$<br>$\tau_{rRNA}$ | hour          | 48                               | (8)        |
| Michaelis constant                   | $K_M$                           | RNA counts    | -                                | See GitHub |
| RNase mechanism of action            | -                               | -             | endo-/exo-RNase                  | See GitHub |
| EndoRNase specificity <sup>(2)</sup> | -                               | -             | Specificity for mRNA, tRNA, rRNA | See GitHub |

Table 6: Table of parameters for RNA degradation process.

<sup>(1)</sup>Non-measured mRNA half-lives were estimated as the mean mRNA half-life (5.75 min).

<sup>(2)</sup>Matrix relating each endoRNase to the type(s) of RNA that it targets.

### Associated files

| wcEcoli Path                                     | File               | Type         |
|--------------------------------------------------|--------------------|--------------|
| wcEcoli/models/ecoli/processes                   | rna_degradation.py | process data |
| wcEcoli/reconstruction/ecoli/dataclasses/process | rna_decay.py       | data         |
| wcEcoli/reconstruction/ecoli/flat                | rnas.tsv           | raw data     |
| wcEcoli/reconstruction/ecoli/flat                | endoRnases.tsv     | raw data     |

Table 7: Table of files for RNA degradation.

#### 1.1.6.4 Translation

**Model implementation.** Translation is the process by which the coding sequences of mRNA transcripts are translated by 70S ribosomes into polypeptides that then fold into proteins. This process accounts for more than two thirds of an *E. coli* cell’s ATP consumption during rapid growth (9) and the majority of macromolecular mass accumulation. In the *E. coli* model translation occurs through the action of two processes in the model: PolypeptideInitiation and PolypeptideElongation.

**Initiation.** PolypeptideInitiation models the complementation of 30S and 50S ribosomal subunits into 70S ribosomes on mRNA transcripts. This process is in many ways analogous to the TranscriptInitiation process - the number of initiation events per transcript is determined in a probabilistic manner and dependent on the number of free ribosomal subunits, each mRNA transcript's translation efficiency, and the counts of each type of transcript. The total number of ribosomes to activate in each time step is determined such that the average fraction of actively translating ribosomes matches experimental values. This is done by assuming a steady state concentration of active ribosomes (and therefore a constant active fraction), similar to what was done for RNA polymerases in TranscriptInitiation:

$$\frac{dR_{70S}}{dt} = p_{act} \cdot \min(R_{30S}, R_{50S}) - r \cdot R_{70S} = 0 \quad (45)$$

$$p_{act} = \frac{r \cdot R_{70S}}{\min(R_{30S}, R_{50S})} \quad (46)$$

where  $R_{70S}$  is the concentration of active 70S ribosomes,  $R_{50S}$  and  $R_{30S}$  are the concentrations of free 50S and 30S ribosomal subunits, respectively,  $p_{act}$  is the activation probability and  $r$  is the expected termination rate for active 70S ribosomes. Defining the active fraction as  $f_{act} = \frac{R_{70S}}{R_{70S} + \min(R_{30S}, R_{50S})}$ ,  $p_{act}$  can be defined in terms of the desired active fraction:

$$p_{act} = \frac{r \cdot f_{act}}{1 - f_{act}} \quad (47)$$

This activation probability is then used to determine how many 70S ribosomes will be formed and initiated. These newly initiated 70S ribosomes are distributed to mRNA transcripts based on their translation probabilities, which is computed by normalizing the product of the translational efficiency of each transcript and the counts of each transcript.

$$p_i = \frac{c_{mRNA,i} \cdot t_i}{\sum_{j=1}^{n_{gene}} c_{mRNA,j} \cdot t_j} \quad (48)$$

Here,  $p_i$  is the translation probability of the transcript of gene  $i$ ,  $c_{mRNA,i}$  is the count of the transcript of gene  $i$ , and  $t_i$  is the translation efficiency of the transcript of gene  $i$ . The trans-



lational efficiencies of each transcript were calculated from ribosomal profiling data (10). For transcripts whose translation efficiencies were not given in this dataset, the average of the existing efficiency values was used as the translation efficiency. Full 70S ribosomes are formed on mRNA transcripts by sampling a multinomial distribution with the  $p_i$ 's calculated above as the probabilistic weights (See Algorithm 11).

This process is implemented similarly in the *M. genitalium* model with a few key differences. Unlike the *M. genitalium* model, the *E. coli* model is not yet gene complete, and hence does not check for initiation factors. A major advancement over the *M. genitalium* model is that the probability of ribosome initiation on a transcript is now proportional to the product of the mRNA count and its translational efficiency. In the *M. genitalium* model translational efficiencies were not taken into account.

**Elongation.** PolypeptideElongation models the polymerization of amino acids into polypeptides by ribosomes using an mRNA transcript as a template, and the termination of elongation once a ribosome has reached the end of an mRNA transcript. This process is implemented assuming that tRNA charging by synthetases, ternary complex formation (GTP : EF-Tu : charged-tRNA), and ternary complex diffusion to elongating ribosomes are not rate limiting for polypeptide polymerization. Given this assumption this process directly polymerizes amino acids based on the codon sequence of the mRNA transcript. Polymerization occurs across all ribosomes simultaneously and resources are allocated to maximize the progress of all ribosomes within the limits of the maximum ribosome elongation rate, available amino acids and GTP, and the length of the transcript (see Algorithm 12).

Under our simulation conditions, we empirically observe that the rate of translation elongation is always limited by the supply of amino acids, not by the elongation rates of ribosomes or the supply of GTP. Thus, the rate at which amino acids are supplied to translation largely

determines the synthesis rates of proteins, which in turn is highly correlated with the growth rate of the cell. We have therefore added an option to add Gaussian noise to this supply rate of amino acids to translation, in cases where heterogeneity in growth rates between individual simulations would be a desired outcome.

Unlike the *M. genitalium* model, this process in the *E. coli* model does not account for elongation factors. Additionally, tRNAs and their synthetases are not accounted for explicitly. Instead, the model directly polymerizes amino acids into elongating polypeptides. This avoids computational issues with the simulation time step, tRNA pool size, and tRNA overexpression that were present in the *M. genitalium* model. There is no implementation of ribosome stalling or tmRNAs at this point. The polymerization resource allocation algorithm is the same as in the *M. genitalium* model.

---

**Algorithm 11: Ribosome initiation on mRNA transcripts**

---

**Input :**  $f_{act}$  fraction of ribosomes that are active

**Input :**  $r$  expected termination rate for active ribosomes

**Input :**  $t_i$  translational efficiency of each mRNA transcript where  $i = 1$  to  $n_{gene}$

**Input :**  $c_{mRNA,i}$  count of each mRNA transcript where  $i = 1$  to  $n_{gene}$

**Input :**  $c_{30S}$  count of free 30S ribosomal subunit

**Input :**  $c_{50S}$  count of free 50S ribosome subunit

**Input :** multinomial() function that draws samples from a multinomial distribution

1. Calculate probability ( $p_{act}$ ) of free ribosomal subunits binding to a transcript.

$$p_{act} = \frac{r \cdot f_{act}}{1 - f_{act}}$$

2. Calculate the number of 70S ribosomes that will be formed and initiated ( $c_{70S,b}$ ).

$$c_{70S,b} = p_{act} \cdot \min(c_{30S}, c_{50S})$$

3. Calculate probability ( $p_i$ ) of forming a ribosome on each mRNA transcript weighted by the count and translational efficiency of the transcript.

$$p_i = \frac{c_{mRNA,i} \cdot t_i}{\sum_{j=1}^{n_{gene}} c_{mRNA,j} \cdot t_j}$$

4. Sample multinomial distribution  $c_{70S,b}$  times weighted by  $p_i$  to determine which transcripts receive a ribosome and initiate ( $n_{init,i}$ ).

$$n_{init,i} = \text{multinomial}(c_{70S,b}, p_i)$$

5. Assign  $n_{init,i}$  ribosomes to mRNA transcript  $i$ . Decrement 30S and 50S counts.

$$c_{30S} = c_{30S} - \sum_{i=1}^{n_{gene}} n_{init,i}$$

$$c_{50S} = c_{50S} - \sum_{i=1}^{n_{gene}} n_{init,i}$$

**Result:** 70S ribosomes are formed from free 30S and 50S subunits on mRNA transcripts scaled by the count of the mRNA transcript and the transcript's translational efficiency.

---

---

**Algorithm 12: Peptide chain elongation and termination**

---

**Input :**  $e_{expected}$  expected elongation rate of ribosome ( $e_{expected} < e_{max}$ )  
**Input :**  $p_i$  position of ribosome on mRNA transcript  $i = 1$  to  $n_{ribosome}$   
**Input :**  $\Delta t$  length of current time step  
**Input :**  $c_{GTP}$  counts of GTP molecules  
**Input :**  $L_j$  length of each mRNA  $j = 1$  to  $n_{gene}$  for each coding gene.  
/\* Elongate polypeptides up to limits of sequence, amino acids, or energy \*/  
**for each ribosome  $i$  on mRNA transcript  $j$  do**  
    **1.** Based on ribosome position  $p_i$  on mRNA transcript and expected elongation rate  $e_{expected}$  determine “stop condition” position ( $t_i$ ) for ribosome assuming no amino acid limitation. Stop condition is either maximal elongation rate scaled by the time step or the full length of sequence (i.e. the ribosome will terminate in this time step).  
        
$$t_i = \min(p_i + e_{expected} \cdot \Delta t, L_j)$$
  
    **2.** Derive sequence between ribosome position ( $p_i$ ) and stop condition ( $t_i$ ).  
    **3.** Based on derived sequence calculate the number of amino acids required to polymerize sequence  $c_{aa,i}^{req}$  and number of GTP molecules required  $c_{GTP}^{req}$ .  
    **4.** Elongate up to limits:  
    **if** all( $c_{aa,k}^{req} < c_{aa,k}$ ) **and**  $c_{GTP}^{req} < c_{GTP}$  **then**  
        Update the position of each ribosome to stop position  
        
$$p_i = t_i$$
  
    **else**  
        Update position of each ribosome to maximal position given the limitation of  $c_{aa,k}$  and  $c_{GTP}$ .  
    **5.** Update counts of  $c_{aa,k}$  and  $c_{GTP}$  to reflect polymerization usage.  
/\* Terminate ribosomes that have reached the end of their mRNA transcript \*/  
**for each ribosome  $i$  on transcript  $j$  do**  
    **if**  $p_i == L_j$  **then**  
        **1.** Increment count of protein that corresponds to elongating polypeptide that has terminated.  
        **2.** Dissociate ribosome and increment 30S and 50S counts.  
**Result:** Each ribosome is elongated up to the limit of available mRNA sequence, expected elongation rate, amino acid, or GTP limitation. Ribosomes that reach the end of their transcripts are terminated and released.

---

### Associated data

| Parameter                               | Symbol        | Units          | Value                 | Reference |
|-----------------------------------------|---------------|----------------|-----------------------|-----------|
| Active fraction of ribosomes            | $f_{act}$     | -              | 0.8                   | (7)       |
| Translational efficiency <sup>(1)</sup> | $t_i$         | ribosomes/mRNA | [0, 5.11]             | (10)      |
| Ribosome elongation rate                | $e$           | aa/s           | 18 (growth-dependent) | (7)       |
| Protein counts (validation data)        | $c_{protein}$ | protein counts | [0, 250000]           | (11)      |

Table 8: Table of parameters for translation process.

<sup>(1)</sup>Non-measured translational efficiencies were estimated to be equal to the average translational efficiency (1.11 ribosomes/mRNA).

### Associated files

| wcEcoli Path                                     | File                         | Type            |
|--------------------------------------------------|------------------------------|-----------------|
| wcEcoli/models/ecoli/processes                   | polypeptide_initiation.py    | process         |
| wcEcoli/models/ecoli/processes                   | polypeptide_elongation.py    | process         |
| wcEcoli/reconstruction/ecoli/dataclasses/process | translation.py               | data            |
| wcEcoli/reconstruction/ecoli/flat                | proteins.tsv                 | raw data        |
| wcEcoli/reconstruction/ecoli/flat                | translationEfficiency.tsv    | raw data        |
| wcEcoli/validation/ecoli/flat                    | schmidt2015_javier_table.tsv | validation data |

Table 9: Table of files for translation.

#### 1.1.6.5 Protein degradation

**Model Implementation.** The ProteinDegradation process accounts for the degradation of protein monomers. It uses the N-end rule (12) to assign half-lives for each protein monomer with half-lives for select protein determined experimentally as noted in the main text. Specific proteins to be degraded are selected as a Poisson process. The *E. coli* model is not yet gene complete, hence this process does not take into account the activities of specific proteases and does not specifically target prematurely aborted polypeptides. In addition, protein unfolding and refolding by chaperones is not accounted for by this process. The exclusion of these effects is a difference from the *M. genitalium* model and may be the reason for the discrepancies in protein half-lives observed in Figure 5.

---

**Algorithm 13: Protein degradation**

---

**Input :**  $t_{1/2,i}$  Protein half-lives for each monomer where  $i = 1$  **to**  $n_{protein}$

**Input :**  $L_i$  length of each protein monomer where  $i = 1$  **to**  $n_{protein}$

**Input :**  $c_{aa,i,j}$  number of each amino acid present in the protein monomer where  $i = 1$  **to**  $n_{protein}$  and  $j = 1$  **to** 21 for each amino acid

**Input :**  $c_{protein,i}$  the number of each protein present in the cell

1. Determine how many proteins to degrade based on the degradation rates and counts of each protein.

$$n_{protein,i} = \text{poisson}\left(\frac{\ln(2)}{t_{1/2,i}} \cdot c_{protein,i} \cdot \Delta t\right)$$

2. Determine the number of hydrolysis reactions ( $n_{rxns}$ ) that will need to occur.

$$n_{rxns} = \sum_i (L_i - 1) \cdot n_{proteins,i}$$

3. Determine the number of amino acids ( $n_{aa,j}$ ) that will be released.

$$n_{aa,j} = \sum_i c_{aa,i,j} \cdot n_{proteins,i}$$

4. Degrade selected proteins, release amino acids from those proteins back into the cell, and consume  $H_2O$  according to the number required for the hydrolysis reactions.

**Result:** Proteins are selected and degraded. During the process water is consumed, and amino acids are released.

---

**Associated data**

| Parameter                     | Symbol    | Units | Value       | Reference  |
|-------------------------------|-----------|-------|-------------|------------|
| N-end rule protein half-lives | $t_{1/2}$ | min   | 2 or 600    | (12)       |
| Measured protein half-lives   | $t_{1/2}$ | hr    | [0.6, 39.7] | This study |

Table 10: Table of parameters for protein degradation process. The measured protein half-lives are for DcuR, BioD, Rph, CarA, Pnp, GshA, and CdsA. Note: CdsA was unable to be measured exactly but was observed to be longer than 2 minutes (which is its expected value according to the N-end rule) so was assigned 10 hours.

**Associated files**

| wcEcoli Path                                     | File                   | Type     |
|--------------------------------------------------|------------------------|----------|
| wcEcoli/models/ecoli/processes                   | protein_degradation.py | process  |
| wcEcoli/reconstruction/ecoli/dataclasses/process | translation.py         | data     |
| wcEcoli/reconstruction/ecoli/flat                | protein_half_lives.tsv | raw data |

Table 11: Table of files for protein degradation.

### 1.1.6.6 Complexation

**Model implementation.** This process models the formation of all macromolecular complexes except for the formation of 70S ribosomes from 30S and 50S subunits, which is performed by Translation. Macromolecular complexation is done by identifying complexation reactions that are possible (which are reactions that have sufficient counts of all sub-components), performing one randomly chosen possible reaction, and re-identifying all possible complexation reactions. This process assumes that macromolecular complexes form spontaneously, and that complexation reactions are fast and complete within the time step of the simulation. This approach is very similar to the *M. genitalium* model of complexation with the exception that the selection of a complexation reaction was weighted by a multinomial distribution parameterized by substrate availability rather than a uniform distribution. We found that the choice of distribution had no major effect on behavior of the process. Additionally, the *M. genitalium* simulations describe 201 macromolecular complexes, whereas over 5 times as many are implemented in the *E. coli* model.

---

**Algorithm 14:** Macromolecular complexation

---

**Input :**  $c_i$  counts of molecules where  $i = 1$  to  $n_{molecules}$   
**Input :**  $S$  matrix describing reaction stoichiometries where  $S_{i,j}$  describes the coefficient for the  $i^{th}$  molecule in the  $j^{th}$  reaction  
**Input :** getPossibleReactions function that takes  $c_i$  and  $S$  and returns all reactions that are possible  
**Input :** chooseRandomReaction function that takes all possible reactions and returns one randomly chosen reaction  
**while** possible reactions remaining **do**  
    **1.** Get all possible reactions ( $r$ )  
         $r = \text{getPossibleReactions}(S, c_i)$   
    **2.** Choose a random possible reaction ( $r_{choice}$ ) to perform  
         $r_{choice} = \text{chooseRandomReaction}(r)$   
    **3.** Perform  $r_{choice}$  by incrementing product counts and decrementing reactant counts  
**Result:** Macromolecule complexes are formed from their subunits according to their known stoichiometries.

---

## Associated data

Stoichiometric coefficients that define 1,023 complexation reactions from EcoCyc (13).

## Associated files

| wcEcoli Path                                     | File                      | Type     |
|--------------------------------------------------|---------------------------|----------|
| wcEcoli/models/ecoli/processes                   | complexation.py           | process  |
| wcEcoli/reconstruction/ecoli/dataclasses/process | complexation.py           | data     |
| wcEcoli/reconstruction/ecoli/flat                | complexationReactions.tsv | raw data |

Table 12: Table of files for complexation.

### 1.1.6.7 Metabolism

**Model implementation.** Our challenge in modeling metabolism at the large scale is best reflected in the two major approaches to modeling metabolic networks. Both approaches begin by writing a number of ordinary differential equations to reflect conservation of mass for each of the metabolites in the system. In a kinetics-based approach, the terms of the ODEs are represented in terms of enzyme and small molecule concentrations. The difficulty in implementing this approach at a large scale is that (1) a majority of the parameters are not known, and (2) the link between the parameter values - each measured with their own error - is rigid in this approach, such that it is generally impossible to build a model even at a smaller scale without abandoning most of the experimental data and performing extensive model fitting.

The second approach is called flux balance analysis (FBA), and is a common way to model large-scale metabolic network behavior with a low parameter requirement. However, traditional implementations of FBA are inappropriate for whole-cell modeling due to the dynamic nature of whole-cell simulation and fixed nature of the classic FBA objective function. Moreover, in cases such as *E. coli*, where many parameter values have been measured, it would be unfortunate not to use these measurements.

The method we describe here incorporates the best parts of both kinetics- and flux-balance-



based modeling. This enables the model to run stably at a large scale, incorporating known parameter values without additional fitting, and in a manner that is readily integrable with the rest of a whole-cell modeling approach. This is done by using an alternative objective function that involves a multi-objective minimization for homeostatic metabolite composition and reaction kinetics that extends previous work by Birch *et al.* (14). The effect of this multi-objective function is twofold: (1) to maintain cellular concentrations of small molecule metabolites and (2) to enforce constraints on metabolic fluxes calculated from Michaelis-Menten kinetics based on metabolite concentrations and curated kinetic parameters. A weighting factor is used to balance the contribution from the two objectives.

We used the metabolic network reconstruction from Weaver *et al.* (15) because it was well-connected to the rest of EcoCyc's resources and data which we relied on. This network reconstruction was based on the Orth model (16). Different nutrient conditions (minimal M9, +amino acids, -oxygen, etc.) can be specified by changing bounds on metabolite import reactions, and shifts between these nutrient conditions can be programmatically varied.

**Homeostatic objective.** The homeostatic objective attempts to maintain small molecule metabolite concentrations at a constant value. For example, if during a time-step the net effect of other `Process` execution transforms ATP to ADP, the concentration of ATP will be lower and ADP higher. The homeostatic objective ensures that the metabolic network will attempt to increase the ATP concentration and decrease the ADP concentration using chemical transformations available in the network.

A total of 140 metabolite set-point concentrations are specified in the objective ( $C_{o,i}$  in Equation 49). A list of those metabolites with concentrations in the model is given in Table S7. The homeostatic objective minimizes the deviation from these measured concentrations and can

be specified as:

$$\text{minimize } \sum_i \left| 1 - \frac{C_i}{C_{o,i}} \right| \quad (49)$$

where  $C_i$  is the concentration of metabolite  $i$  and  $C_{o,i}$  is the measured set-point concentration for metabolite  $i$ . Cytoplasmic concentrations were chosen based on data from Bennett *et al.* (17), and other components of biomass have set-point concentrations specified based on the overall composition of the cell (lipids, metal ions, etc.) (18) and can be dependent on the media environment of the simulation.

This approach is an improvement over the *M. genitalium* simulations, where metabolites were produced in a fixed ratio at every time step regardless of the behavior of the rest of the simulated cell—this could lead to pooling or depletion of metabolites. Furthermore, if one metabolite could not be produced, none of the metabolites could be produced. Our homeostatic objective fixes both of these shortcomings.

**Kinetics objective.** The *E. coli* model simulates both metabolic enzyme expression via transcription and translation and dynamically maintains 140 metabolite concentrations. This enables the use of Michaelis-Menten kinetic equality constraints on metabolic fluxes using Equation 50:

$$v_{o,j} = k_{cat} \cdot E \cdot \left( \frac{C_1}{C_1 + K_{m,1}} \right) \cdot \left( \frac{C_2}{C_2 + K_{m,2}} \right) \cdots \left( \frac{C_n}{C_n + K_{m,n}} \right) \quad (50)$$

where  $v_{o,j}$  is the kinetic target for the flux through reaction  $j$  that has  $n$  substrates,  $k_{cat}$  is the catalytic turnover rate for enzyme  $E$ ,  $K_{m,n}$  is the saturation constant for substrate  $n$ ,  $E$  is the concentration of metabolic enzyme, and  $C_n$  is the concentration of substrate  $n$  in reaction  $j$ .

Kinetics data was reviewed from over 12,000 papers identified from BRENDA (19). We filtered out papers that did not have a  $k_{cat}$  and which did not use a lab strain, or which concerned

non-metabolic enzymes. The result was roughly 1200 papers which we manually curated due to our and others' observation that about 20% of the values in the BRENDA database are copied incorrectly from their primary source papers (20). From this set, we further removed enzymes that were not included in our metabolic model and consolidated the results of multiple studies (usually preferring experiments conducted at 37°C and/or the report with the highest  $k_{cat}$  value). In all, 179 constraints with a  $K_M$  and  $k_{cat}$  and 216 constraints with only a  $k_{cat}$  are used to constrain a total of 380 reactions (with some reactions having multiple constraints). Although some additional constraints were identified, they are not currently being used in the model. In particular, constraints were found for tRNA charging (18 reactions) but not used since tRNA charging is not explicitly included in the model. Additionally, as discussed in the main text, constraints for four reactions (succinate dehydrogenase, NADH dehydrogenase, inorganic pyrophosphatase, and glutathione reductase) were identified that, when included, caused a much higher glucose uptake rate than observed without kinetic constraints and higher than what has been experimentally measured. In related analysis also outlined in the main text, two more reactions (isocitrate dehydrogenase and glyoxylate reductase) were found to be under additional control that is not modeled so their constraints were excluded. Based on this, constraints related to these 24 reactions were excluded from the model. A complete list of the 431 reactions with curated kinetic parameters, including those mentioned above that were excluded from the model, is found in Table S8.

In cases where the enzyme parameters were recorded at non-physiological temperatures, we used the following scaling relationship to adjust the  $k_{cat}$ :

$$k_{cat,adj} = 2^{\frac{37-T}{10}} \cdot k_{cat} \quad (51)$$

where  $T$  is the reported temperature (in °C) for the experimental conditions—this increases the kinetic rate by a factor of 2 for every 10 °C below 37 °C. The factor 2 comes from an

approximation of the change in rates determined by the Arrhenius equation:

$$k = A \cdot e^{-\frac{E_a}{R \cdot T}} \quad (52)$$

where  $k$  is the calculated rate,  $A$  is a constant for a given reaction,  $E_a$  is the activation energy for a given reaction,  $R$  is the universal gas constant and  $T$  is the temperature. Assuming  $E_a \approx 50,000 \frac{J}{mol}$  and the temperature increases 10 °C near 25 °C ( $T_1 = 293$  K to  $T_2 = 303$  K), we get an approximate doubling in the rate for the 10 °C increase:

$$\frac{k_2}{k_1} = \frac{A \cdot e^{-\frac{E_a}{R \cdot T_2}}}{A \cdot e^{-\frac{E_a}{R \cdot T_1}}} = \frac{e^{-\frac{50000}{8.314 \cdot 303}}}{e^{-\frac{50000}{8.314 \cdot 293}}} \approx 2.0 \quad (53)$$

Similar to the homeostatic objective, the kinetics objective minimizes deviation from the fluxes determined by the kinetic equations that are calculated at each time step based on the enzyme and metabolite concentrations. Formally:

$$\text{minimize } \sum_j \left| 1 - \frac{v_j}{v_{o,j}} \right| \quad (54)$$

where  $v_j$  is the flux through reaction  $j$  and  $v_{o,j}$  is the target flux for reaction  $j$  calculated from Equation 50. This represents a soft kinetic constraint on reactions for which we have kinetic parameters and depends on concentrations of enzymes and metabolites in the model.

**Combined objective.** The two objectives above are linked in the combined objective by a factor  $\lambda$ , which is chosen to be  $\ll 1$  to prioritize the homeostatic concentration objective function's ability to produce growth at known doubling times, over fit the kinetic data.  $\lambda$  is not a biological parameter such as those found in Table S1 (it is better thought of as a "hyperparameter"), and thus it is not included in that table.

Finally, a hard kinetic constraint of no flux through a reaction is implemented for reactions that have no enzyme present by setting  $v_{max} = 0$ .

This results in the following linear optimization problem that is solved at each time step with GLPK to determine fluxes for each reaction which are used to update the counts of metabolites through exchange reaction fluxes included in the problem:

$$\begin{aligned} \text{minimize} \quad & (1 - \lambda) \sum_i \left| 1 - \frac{C_i}{C_{o,i}} \right| + \lambda \sum_j \left| 1 - \frac{v_j}{v_{o,j}} \right| \\ \text{subject to} \quad & S \cdot v = 0 \\ & v_j \geq v_{min,j} \\ & v_j \leq v_{max,j} \end{aligned}$$

---

**Algorithm 15: Metabolism**


---

**Input :**  $C_i$  concentration for metabolite  $i$

**Input :**  $C_{o,i}$  concentration target for metabolite  $i$

**Input :**  $k_{cat,j}$  turnover number for enzyme  $j$

**Input :**  $K_{m,i,j}$  Michaelis constant for metabolite  $i$  for enzyme  $j$

**Input :**  $E_j$  concentration for enzyme  $j$

**Input :**  $S$  stoichiometric matrix for all reactions

1. Set physical constraints on reaction fluxes

For all reactions:  $v_{min,j} = -\text{inf}, v_{max,j} = +\text{inf}$

For thermodynamically irreversible reactions:  $v_{min,j} = 0$

If required enzyme not present:  $v_{min,j} = v_{max,j} = 0$

2. Calculate kinetic target ( $v_{o,j}$ ) for each reaction  $j$  based on the enzymes  $j$  and metabolites  $i$  associated with each reaction for a soft flux constraint

$$v_{o,j} = k_{cat,j} \cdot E_j \cdot \prod_i \left( \frac{C_i}{K_{m,i,j} + C_i} \right)$$

3. Solve linear optimization problem

$$\text{minimize} \quad (1 - \lambda) \sum_i \left| 1 - \frac{C_i}{C_{o,i}} \right| + \lambda \sum_j \left| 1 - \frac{v_j}{v_{o,j}} \right|$$

$$\text{subject to} \quad S \cdot v = 0$$

$$v_j \geq v_{min,j}$$

$$v_j \leq v_{max,j}$$

4. Update concentrations of metabolites based on the solution to the linear optimization problem

**Result:** Metabolites are taken up from the environment and converted into other metabolites for use in other processes

---

**Associated data**

| Parameter                       | Symbol    | Units     | Value                       | Reference  |
|---------------------------------|-----------|-----------|-----------------------------|------------|
| Metabolic network               | $S$       | -         | Stoichiometric coefficients | (21)       |
| Metabolic target fluxes         | $v_o$     | $\mu M/s$ | [0, 87000]                  | See GitHub |
| Metabolic fluxes (validation)   | $v_v$     | $\mu M/s$ | [82, 1500]                  | (22)       |
| Enzyme turnover number          | $k_{cat}$ | 1/s       | [0.00063, 38000]            | See GitHub |
| Enzyme Michaelis constant       | $K_m$     | $\mu M$   | [0.035, 550000]             | See GitHub |
| Metabolite target concentration | $C_o$     | $\mu M$   | [0.063, 97000]              | (17)       |
| Kinetic objective weight        | $\lambda$ | -         | 1e-6                        | See GitHub |

Table 13: Table of parameters for metabolism process.

## Associated files

| wcEcoli Path                                     | File                                | Type            |
|--------------------------------------------------|-------------------------------------|-----------------|
| wcEcoli/models/ecoli/processes                   | metabolism.py                       | process         |
| wcEcoli/reconstruction/ecoli/dataclasses/process | metabolism.py                       | data            |
| wcEcoli/reconstruction/ecoli/flat                | biomass.tsv                         | raw data        |
| wcEcoli/reconstruction/ecoli/flat                | enzymeKinetics.tsv                  | raw data        |
| wcEcoli/reconstruction/ecoli/flat                | metaboliteConcentrations.tsv        | raw data        |
| wcEcoli/reconstruction/ecoli/flat                | reactions.tsv                       | raw data        |
| wcEcoli/validation/ecoli/flat                    | toya_2010_central_carbon_fluxes.tsv | validation data |

Table 14: Table of files for metabolism.

### 1.1.6.8 Energy requirements of cell maintenance

As was the case in our *M. genitalium* simulations, and in many flux balance analysis models, not all of the energy consumed by metabolic pathways, macromolecular polymerization, or other growth and non-growth associated processes is accounted for explicitly in our *E. coli* model. This is primarily due to a lack of experimental data and/or knowledge accounting for its usage. Similar to the *M. genitalium* model, we have incorporated reactions in the metabolic model with two parameters, Growth Associated Maintenance (GAM) and Non-Growth Associated Maintenance (NGAM), which modulate energy consumption associated with growth and cell maintenance.

#### Associated data

| Parameter                         | Symbol | Units            | Value | Reference |
|-----------------------------------|--------|------------------|-------|-----------|
| Growth associated maintenance     | GAM    | mmol ATP/g DCW   | 59.81 | (23)      |
| Non-growth associated maintenance | NGAM   | mmol ATP/g DCW/h | 8.39  | (23)      |

Table 15: Table of parameters for energy requirements of cell maintenance.

### 1.1.6.9 Chromosome replication

**Model implementation.** Chromosome replication occurs through three steps that are implemented in the ChromosomeFormation and ChromosomeElongation processes. First, a

round of replication is initiated at a fixed cell mass per origin of replication and generally occurs once per cell cycle (see Algorithm 16). This is in contrast to the DnaA based mechanistic model included in the *M. genitalium* model but allows for stable replication over multiple generations and in different growth conditions. Second, replication forks are elongated up to the maximal expected elongation rate, dNTP resource limitations, and template strand sequence but elongation does not take into account the action of topoisomerases or the enzymes in the replisome (see Algorithm 17). Finally, replication forks terminate once they reach the end of their template strand and the chromosome immediately decatenates forming two separate chromosome molecules (see Algorithm 18).

---

**Algorithm 16:** DNA replication initiation

---

**Input :**  $m_{cell}$  cell mass

**Input :**  $m_{critical}$  critical initiation mass

**Input :**  $n_{origin}$  number of origins of replication

**Input :**  $n_{fork,f}$  number of replication forks on forward strand

**Input :**  $n_{fork,r}$  number of replication forks on reverse strand

**Input :**  $C$  length of C period

**Input :**  $D$  length of D period

**if**  $\frac{m_{cell}}{n_{origin}} > m_{critical}$  **then**

$n_{fork,f} = n_{fork,f} + n_{origin}$

$n_{fork,r} = n_{fork,r} + n_{origin}$

$n_{origin} = 2 \cdot n_{origin}$

**Result:** When cell mass is larger than critical initiation mass  $m_c$  another round of replication is initiated with correct number of replication forks

---



---

**Algorithm 17: DNA replication elongation**

---

**Input :**  $e$  maximal elongation rate of replication fork

**Input :**  $p_i$  position of forks on chromosome where  $i = 1$  to  $n_{fork}$

**Input :**  $\Delta t$  length of current time step

**Input :**  $c_{dNTP,j}$  counts of dNTP where  $j = 1$  to 4 for dCTP, dGTP, dATP, dTTP

**Input :**  $L_k$  total length of each strand of chromosome from origin to terminus where  $k = 1$  to 4 for forward/complement and reverse/complement.

**for** each replication fork  $i$  on sequence  $k$  **do**

1. Based on replication fork position  $p_i$  and maximal elongation rate  $e$  determine “stop condition” ( $s_i$ ) for replication fork assuming no dNTP limitation.

$$s_i = \min(p_i + e \cdot \Delta t, L_k)$$

Stop condition is either maximal elongation rate scaled by the time step or the full length of sequence (i.e. the fork will terminate in this time step).

2. Derive sequence between replication fork position ( $p_i$ ) and stop condition ( $s_i$ ).

3. Based on derived sequence calculate the number of dNTPs required to polymerize sequence  $c_{dNTP,i}^{req}$ .

4. Elongate up to limits:

**if** all( $c_{dNTP,i}^{req} < c_{dNTP,j}$ ) **then**

    Update the position of each replication fork to stop position

$$p_i = s_i$$

**else**

    Attempt to equally elongate each replication fork update position of each fork to maximal position given the limitation of  $c_{dNTP,j}$ .

5. Update counts of  $c_{dNTP,j}$  to reflect polymerization usage.

**Result:** Each replication fork is elongated up to the limit of available sequence, elongation rate, or dNTP limitation

---

---

**Algorithm 18: DNA replication termination**

---

**Input :**  $p_i$  position of forks on chromosome where  $i = 1$  to  $n_{fork}$   
**Input :**  $L_k$  total length of each strand of chromosome from origin to terminus where  $k = 1$  to 4 for forward/complement and reverse/complement  
**Input :**  $d_{queue}$  a double ended queue data structure that stores time(s) cell division should be triggered  
**Input :**  $D$  D-period of cell cycle (time between completion of chromosome replication and cell division)  
**Input :**  $t$  Current simulation time  
**for each replication fork  $i$  on strand  $k$  do**  
    **if**  $p_i == L_k$  **then**  
        1. Delete replication fork  
        2. Divide remaining replication forks and origins of replication appropriately across the two new chromosome molecules  
        3. Calculate time cell should trigger division based on current time of chromosome termination and push onto queue data structure  
             $d_{queue}.push(t + D)$   
**Result:** Replication forks that have terminated are removed. A new chromosome molecule is created separating all remaining replication forks. Timer for D-period is started.

---

**Associated data**

| Parameter                                                    | Symbol         | Units     | Value     | Reference |
|--------------------------------------------------------------|----------------|-----------|-----------|-----------|
| Chromosome sequence                                          | -              | -         | -         | (24)      |
| Replication fork elongation rate                             | $e$            | nt/s      | 967       | (25)      |
| Mass per origin at DNA replication initiation <sup>(1)</sup> | $m_{critical}$ | origin/fg | [600,975] | (26)      |
| C period                                                     | $C$            | min       | 40        | (27)      |
| D period                                                     | $D$            | min       | 20        | (27)      |

Table 16: Table of parameters for chromosome replication process.

<sup>(1)</sup>600 is used for anaerobic conditions where the cell mass is lower and was fit to achieve the appropriate D period. All other growth conditions use 975.

## Associated files

| wcEcoli Path                                     | File                      | Type     |
|--------------------------------------------------|---------------------------|----------|
| wcEcoli/models/ecoli/processes                   | chromosome_formation.py   | process  |
| wcEcoli/models/ecoli/processes                   | chromosome_replication.py | process  |
| wcEcoli/reconstruction/ecoli/dataclasses/process | replication.py            | data     |
| wcEcoli/reconstruction/ecoli/flat                | genes.tsv                 | raw data |
| wcEcoli/reconstruction/ecoli/flat                | sequence.fasta            | raw data |

Table 17: Table of files for chromosome replication.

### 1.1.6.10 Cell division

**Model implementation.** Cell division is modeled by the generalized `divide_cell` function and the *E. coli*-specific `ChromosomeReplication` process and `CellDivision` listener in the model. A Helmstetter-Cooper type model of chromosome replication initiation is coupled to cell division, inspired by work from Wallden *et al.* (28). Chromosome replication initiation occurs at a fixed mass per origin of replication. Each initiation event is coupled to a cell division event after a constant period of time consisting of one round of chromosome replication (C period) and cytokinesis (D period). When a round of chromosome replication is completed, the `ChromosomeReplication` process adds the length of the D period to the current time and pushes this time to a queue. The `CellDivision` listener checks this queue and the current time at every timestep, and triggers cell division when the current time passes the earliest time in this queue.

Cell division itself done by the `divide_cell` function and is modeled as a binomial process where each daughter cell has an equal probability of inheriting the contents of the mother cell. The exception to this is if two chromosomes are present before cell division—each daughter is guaranteed to get one. Because the *E. coli* model is not yet gene complete, certain mechanistic details of cell division (eg. cytokinesis, septation, and chromosome segregation) are not yet modeled explicitly.

Due to the coupled nature of chromosome replication and this division model as mentioned

above, Algorithm 18 (previous section) is used to create the doubled ended queue referenced in the cell division implementation provided in Algorithm 19 below.

---

**Algorithm 19:** Cell division

---

**Input :**  $d_{queue}$  a double ended queue data structure that stores the time(s) cell division should be triggered

**Input :**  $c_i$  counts of all molecules in simulation at cell division where  $i = 1$  to  $n_{species}$

**Input :**  $p$  binomial partition coefficient

**Input :**  $n_{chrom}$  number of chromosome molecules

**Input :**  $\text{rand}()$  returns a random number from a uniform distribution between 0 and 1

**Input :**  $\text{randint}()$  returns a random integer either 0 or 1

**if**  $t > d_{queue}.\text{peek}()$  **then**

1. Trigger division and remove division time.  
 $d_{queue}.\text{pop}()$
2. Divide bulk contents of cell binomially. Number partitioned into daughter one is stored in  $n_{daughter,1}$  and to daughter two in  $n_{daughter,2}$ .  
**for**  $i = 1$  **to**  $n_{species}$  **do**  
 $n_{daughter,1} = 0$   
**for**  $j = 1$  **to**  $c_i$  **do**  
     **if**  $\text{rand}() > p$  **then**  
          $n_{daughter,1} = n_{daughter,1} + 1$   
 $n_{daughter,2} = c_i - n_{daughter,1}$
3. Divide chromosome in binary manner. All replication forks and origins of replication associated with a chromosome molecule are partitioned as well. Number of chromosome molecules partitioned into daughter one is stored in  $n_{chrom,daughter,1}$  and to daughter two in  $n_{chrom,daughter,2}$ .  
**if**  $\text{mod}(n_{chrom}, 2)$  **then**  
      $n_{chrom,daughter,1} = \frac{n_{chrom}}{2}$   
**else**  
      $n_{chrom,daughter,1} = \text{floor}(\frac{n_{chrom}}{2}) + \text{randint}()$   
 $n_{chrom,daughter,2} = n_{chrom} - n_{chrom,daughter,1}$

**Result:** Cell division is triggered at C+D time after DNA replication initiation.  
 Contents of mother cell is divided between two daughter cells conserving mass.

---

## Associated files

| wcEcoli Path                   | File                      | Type     |
|--------------------------------|---------------------------|----------|
| wcEcoli/models/ecoli/processes | chromosome_replication.py | process  |
| wcEcoli/wholecell/sim          | divide_cell.py            | function |
| wcEcoli/models/ecoli/listeners | cell_division.py          | listener |

Table 18: Table of files for transcription regulation.

## 1.2 Simulation analysis methods

This section describes how the simulations were used to perform the analysis described in the main text. For convenience, we have organized this section into subsections corresponding to each figure in the main text, together with its related figure in the supplemental materials. Moreover, our GitHub repository (<https://github.com/CovertLab/WholeCellEcoliRelease>) contains a file titled `runscripts/paper/paper_runs.sh` which includes all of the commands to run the simulations and a file titled `runscripts/paper/paper_figures.sh` which includes all of the commands required to generate our figures from the simulation data, for ease of reproduction. Parameter values used for the simulations can be found in the `reconstruction/ecoli/flat` directory, and the literature sources used for Movie S1 can be found at `paper/movie_data_sources.tsv`.

### 1.2.1 Multiple-generation simulations of the cellular response to an environmental shift (related to Fig. 1 and Fig. S1)

For environmental shifts such as the one shown in Fig. 1 and Fig. S1, we initialized our model using the aerobic glucose minimal media environment, and then at time 11,000 seconds (labeled “Environmental Shift”), we changed the environmental conditions to aerobic glucose minimal media supplemented with twenty amino acids (represented by the gray regions). Each environment was set as described above in the “Environments” sub-section. As mentioned in the main text, this version of the model includes changes to the parameter values related to ribosome and RNA polymerase expression (see Section 1.2.2), which differ depending on the

media conditions (which is incorporated at cell initiation described in Section 1.1.5), as well as the parameter values for kinetics and gene expression of certain metabolic enzymes (described in Section 1.2.3).

For the “Integrated Simulation Output” of Fig. 1 and Fig. S1, eight simulations of a single cell growing through nine generations were run, each with its own random seed. At each division, one of the daughters was randomly chosen to continue the simulation, meaning that nine division cycles were captured per simulation. Each simulation required a total of 22,000 seconds of simulation, depending on when division actually occurred for each generation. All eight simulations were inspected and found to be qualitatively similar; only one is used for the panels in Fig. 1 and Fig. S1. For this simulation, the final division event occurred at 21,242 seconds.

Below we list the properties graphed in Fig. 1 and Fig. S1, together with a brief description of how this property was obtained or calculated:

**Cell mass.** Cell mass (blue) was directly extracted from the simulation outputs, and plotted over the cells’ time. Red circles indicate the timepoints when chromosome division is initialized, which is determined under the condition:

$$\frac{m_{cell}}{n_{origin}} > m_{critical} \quad (55)$$

where  $m_{cell}$  is the simulated mass of the cell at a given time point,  $n_{origin}$  is the current number of origins of replication in the cell, and  $m_{critical}$  is the critical mass of initiation - a parameter in the model. (For more details, consult Section 1.1.6.9)

**Instantaneous Growth Rate.** The growth rate was directly extracted from the simulation outputs, converted from 1/sec to 1/min, and plotted over time.

**Active Ribosome Concentration.** The concentration of active ribosomes per time step was determined from counts in the simulation as follows:

$$\text{Active Ribosome Concentration} = \frac{\left(\frac{1}{\text{Avogadro's Number}}\right) \cdot \text{Active Ribosome Count}}{\frac{1}{\text{Cell Density}} \cdot \text{Cell Mass}} \quad (56)$$

where the Active Ribosome Count, cell density and cell mass were extracted directly from the simulation outputs.

**DNA Polymerase Position.** As a replication fork is made, the model monitors the position of the DNA polymerase as it moves in both directions on the chromosome both on the leading and lagging strands. For the plot in Fig. 1 and S1A, the DNA polymerase position was down-sampled so that the position is plotted once every 10 time steps.

**Relative Rate of dNTP Polymerization.** This plot displays the number of pairs of replication forks over time. This value is calculated by dividing the number of replicating strands (which is computed from the DNA polymerase position) by four. As shown in the inset diagram in Fig. S1A, a value of 1 indicates a single chromosome is replicating once (there are 4 strands total in this situation, a leading and lagging strand for both the forward and reverse forks).

**TrpR promoter occupancy; TrpA mRNA counts, translation events and protein counts; internal Trp concentration.** To illustrate the change in gene expression due to the simulated environmental shift, we show several aspects of transcriptional regulation and its downstream effects for the case of tryptophan biosynthesis and regulation of TrpA expression. First, the promoter occupancy of transcriptional inhibitor TrpR is extracted from the simulation and shown as a moving average over time. The number of TrpA mRNA, the number of completed TrpA translation events, and the number of TrpA proteins (including both the monomer and complex) were directly extracted from the simulation outputs at every time step. The internal tryptophan

concentration was obtained as a number of cytoplasmic molecules, and converted to a concentration using this equation:

$$\text{Internal Tryptophan Concentration} = \frac{\left(\frac{1}{\text{Avogadro's Number}}\right) \cdot \text{Internal Tryptophan Count}}{\frac{1}{\text{Cell Density}} \cdot \text{Cell Mass}} \quad (57)$$

**Average Instantaneous Growth Rate.** For each time step, the masses of the cell, protein and RNA were extracted. The instantaneous growth rate for each mass fraction was calculated as follows, over each time step:

$$\text{Instantaneous Growth Rate} = \frac{\frac{\Delta m}{dt}}{m_{\text{initial}}} \quad (58)$$

where  $\Delta m$  refers to the change in mass across a time step,  $dt$  is the length of the time step and  $m_{\text{initial}}$  refers to the mass at the start of the time step. A moving average was computed and plotted over time.

**Metabolic Fluxes.** For the metabolic fluxes shown in Fig. S1B and S1C, time courses of key fluxes were obtained directly from the simulation output, and modified using a moving average for visual clarity. Panel B shows several flux time courses superimposed on the metabolic network. In cases where multiple enzymes catalyze a single metabolic reaction, the sum of their fluxes is displayed. For the network diagram (Fig. S1B), a window of 45 minutes before and after the shift is shown; the larger plots (Fig. S1C) show the fluxes for all nine generations.

### 1.2.2 Simulation of physiological measurements (related to Fig. 2 and Fig. S2)

This section describes the investigation of the first inconsistency identified in the main text: that the total output of the ribosomes and RNA polymerases was not sufficient for the simulated cell to reproduce measured doubling times. After characterizing the inconsistency, gene groups and parameter types were identified as favorable candidates for adjustment. From these results,



an iterative parameter estimation approach was developed and applied to the transcript synthesis probabilities of RNA polymerase and ribosome subunits to address the inconsistency, and resulted in the doubling time compatible cell. Please see the main text for the context of this investigation in the overall study.

**Original Parameters Resulted in a Doubling Time Inconsistency:** To obtain the histogram of the simulated doubling times shown in Fig. 2A, 256 simulations, each following 4 generations of cells, were simulated in aerobic glucose minimal medium with the original synthesis probabilities. To avoid bias from initialization, only the third and fourth generations of cells were analyzed. The experimentally measured doubling time of 44 minutes was informed (29, 30). Note that in all doubling time histograms presented in this work (Figures 2A, 2C, 2D, and S2C), the main source of heterogeneity in doubling times between individual simulations is the Gaussian noise factor that is added to the supply rate of amino acids in the translation process (See Section 1.1.6.4 for details).

**Identification of Candidate Gene Groups via Parameter Sensitivity Analysis:** It was challenging to determine the best way to analyze the parameter values *in toto*. All of the parameters included in Table S1 carry independent information in the model, as they are derived from separate datasets and measurement types and are implemented in different parts of the model. Thus, even though some parameter categories can have similar effects on model states (e.g., either increasing translation efficiency or increasing protein half lives will lead to higher protein counts), the dynamics will differ (e.g., increasing translation efficiency will increase the rate of protein synthesis while increasing protein half lives will decrease the rate of protein degradation). Additionally, while there might be some correlation between certain values (e.g., two genes on the same transcription unit would be expected to show correlated expression across measurements and conditions), the extent of this correlation remains unclear in most cases. We

therefore required methods that could simultaneously capture the parameters' independence as well as potential interactions with regard to influence on simulation output.

To determine the impact of each parameter on the simulated cell's growth rate, 20,000 simulations with varied parameters were run for 10 seconds each. In each simulation, 10% of the parameters were randomly chosen and increased by a factor of 5 and another 10% were randomly chosen and decreased by a factor of 5 (0.2x original value). Then, the average growth rate was calculated for each simulation using the last 5 time steps (to allow an initial adjustment period). The effect ( $e_i$ ) of each parameter on the simulated growth rate was determined by computing the difference in growth rates when the parameter was adjusted to the higher value and the lower value. A z-score for each parameter can be calculated by using the mean ( $\mu$ ) and standard deviation ( $\sigma$ ) of the effect across all parameters. Therefore, the z-score ( $z_i$ ) for parameter  $i$  with effect  $e_i$  will be:

$$z_i = \frac{e_i - \mu}{\sigma}$$

Because many parameters are being adjusted simultaneously, the z-score cutoff was determined with a p-value of 0.05 that was adjusted for multiple hypothesis testing for the 17,822 parameters that were adjusted. A z-score between -4.54 and 4.54 should contain the data with a probability of  $1 - \frac{0.05}{17822}$  as determined with the inverse error function below:

$$z_{cutoff} = \sqrt{2} \cdot \text{erf}^{-1}(2p - 1) = \sqrt{2} \cdot \text{erf}^{-1}\left(2\left(1 - \frac{0.05}{17822}\right) - 1\right) = 4.54$$

The parameter sensitivity analysis described here identified candidate gene groups that are most likely to impact the simulated cell's growth rate: genes related to the expression of RNA polymerase, ribosomes, and RNAses (Fig. 2B).

**Iterative Parameter Estimation Approach:** The iterative parameter estimation approach described here is used to adjust the transcript synthesis probabilities of specified gene groups

such as subunits of RNA polymerase or ribosomes (as in Fig. 2C) and their combination (as in Fig. 2D).

First, we present an equation which can be used to link either ribosomal or RNA polymerase concentration to the production of protein or RNA, respectively. For a given species (either protein or RNA) with concentration  $x_i$ , the rate of production depends on the ribosomal or RNA polymerase concentration dedicated to production of that species  $c_i$ . Each species will also have a length  $l_i$  in dimensions of monomers per product, whether in terms of nucleic acid or amino acid. Finally, ribosomes and RNA polymerases both have a given elongation rate  $r$  (in dimensions of monomers per polymerase per unit time). The loss rate of the protein or RNA is given as  $\beta_i$ , which is a function of  $x_i$  (obtained from the cellular growth rate, and first-order decay for protein, or Michaelis-Menten kinetics for RNA, see Section 1.1.6.3 above), with dimensions of product concentration per unit time. Taking these terms together, we have the following equation:

$$\frac{dx_i}{dt} = l_i^{-1} r c_i - \beta_i \quad (59)$$

Setting  $dx_i/dt = 0$  and solving for  $c_i$  gives us the amount of polymerase needed for each product:

$$c_i = \frac{\beta_i l_i}{r} \quad (60)$$

To determine the ribosomal or RNA polymerase requirements for production of all species (total protein or RNA), we can write the following aggregate equation for the *total* amount of polymerase  $C$ , which is the sum over the components:

$$C = r^{-1} \beta \cdot l \quad (61)$$

Here  $\beta \cdot l$  is the dot-product.

It is important to remember that the production of ribosomes and RNA polymerases also depends on their own concentration, making them unique amongst the protein and RNA species. To obtain the final determination of ribosomes and RNA polymerases required to produce cellular products, we require an iterative algorithm. We first update the vector  $x$  such that the concentration of either the ribosomal or RNA polymerase species is updated with the result  $C$ . Changing  $x$  also changes the total mass of that component (the total protein or RNA mass), which we wish to maintain. Thus, we normalize the abundances according to their molecular weights  $m$  and target total mass  $M$  to achieve  $x'$ :

$$x' = \frac{M}{m \cdot x} x \quad (62)$$

Here  $m \cdot x$  is the dot-product. Now we must recompute  $\beta$ , as it is a function of  $x$  with the general form:

$$\beta(x) = \mu x + kx + v(x) \quad (63)$$

where  $\mu$  is the specific growth rate (dilution rate constant),  $k$  is a first-order decay constant, and  $v$  is some Michaelis-Menten kinetic rate law for degradation. We recompute  $\beta \rightarrow \beta(x')$ , and then use this new value of  $\beta$  starting with Equation 61. This procedure is repeated until the change in  $x$  over the iteration ( $\Delta x$ ) becomes trivially small; in practice we choose the termination condition

$$\sum_i \sqrt{\Delta x_i^2} < 10^{-9} \quad (64)$$

This condition is met in approximately 5 iterations. Note that, in the simplest cases, it may be possible to find a closed-form solution for this problem (i.e. a solution that does not require iteration). However this procedure is carried out in parallel for both the ribosomes and RNA polymerases, and furthermore the expression of  $\beta$  can be difficult to invert. Thus, this iterative approach, which requires minimal back-calculation, is preferable.

From the iterative parameter estimation approach presented here, we obtain  $x$  to determine the RNA synthesis probabilities. Similarly to Fig. 2A, 256 simulations, each following 4 generations of cells, were simulated in aerobic glucose minimal medium in each of the following conditions: new RNA polymerase synthesis probabilities (Fig. 2C, left), new ribosome-related synthesis probabilities (Fig. 2C, middle), and new synthesis probabilities for both the RNA polymerases and ribosomes (Fig. 2D). To avoid bias from initialization, only the third and fourth generations of cells are analyzed. Fig. S2C shows similar histograms for aerobic glucose medium supplemented with amino acids and for anaerobic glucose minimal medium, both with the new synthesis probabilities for RNA polymerases and ribosomes (as in Fig. 2D). The fold-changes for all genes following the application of this procedure to both RNA polymerases and ribosomes (versus the original expression levels) are provided in Table S2B.

To estimate new mRNA half lives (Fig. S2A, column 9), the loss rate  $\beta_i$  in Equation 59 was specified as:

$$\frac{dx_i}{dt} = l_i^{-1}rc_i - \left( \frac{\ln 2}{\tau} + k_d \right) x_i \quad (65)$$

where  $k_d$  is the mRNA degradation rate ( $= \ln 2/\text{half life}$ ) and  $\tau$  is the doubling time of the cell. Then, rather than isolating the concentration  $c_i$  as was done to reach Equation 60,  $k_d$  was isolated:

$$k_d = l_i^{-1}rc_i x_i^{-1} - \frac{\ln 2}{\tau} \quad (66)$$

Equation 61 is used to find the target RNA polymerase abundance, which is used as an input to Equation 66 to find mRNA degradation rates (for subunits of RNA polymerase and ribosomes only) that minimizes differences between the number of RNA polymerases that can be formed and the number of RNA polymerases needed to maintain steady state concentrations of RNAs. During the iterations, the degradation rates have a lower limit of zero (ie. cannot become negative) and, similarly to before, the same termination condition (Equation 64) is applied.

**Validation and Parameter Variability Investigation:** To validate the state of the cells simulated by the new synthesis probabilities for both the RNA polymerases and ribosomes (Fig. 2D), the abundances of RNA polymerase and ribosomes at the conclusion of the iterative parameter estimation approach described by Equation 59 through 64 (and represented schematically in Fig. S2B) were compared with those reported in literature (7) in Fig. 2E.

With the understanding that the cell state in Fig. 2D is well-validated, we pursued a mechanistic understanding (with regard to the model) of why the pre-calibration cell state (depicted in Fig. 2A) was growth-rate-incompatible (ie. does not double in the expected doubling time). To do so, all parameters which could possibly contribute to the RNA polymerase and ribosome counts were considered for their potential to impact the growth-rate of the simulated cells. With the exception of parameters that were assumed to have little variability across data sources (the molecular masses of mRNA transcripts and protein monomers, and their lengths in number of nucleotides or amino acids), all other parameters participated in the analysis summarized in Fig. S2A. These parameters were evaluated according to three criteria: consistency with (1) literature reports, (2) expected abundances of RNA polymerase and ribosome, and (3) expected doubling time.

First, we considered literature consistency. Parameter values that have been reported multiple times in the literature give us an opportunity not only to assess the possible variability of the

value itself, but also to run simulations using any of the values - in order to determine how much the simulation output is affected. Thus, when available, direct measurements were compared to the parameter values as validation (Table S2A). Validation data could not be identified for three parameters: R-protein half lives, RNA polymerase elongation rate, and RNA Polymerase active fraction. For such cases, instead of changing the original simulation value with a new literature measurement (“swap”), we performed a more detailed computational analysis. For the R-protein half-lives, the N-end rule only provides two half life possibilities. Thus, the R-protein half lives, which had been assigned 10 hours, were swapped for 2 minutes. For the RNA polymerase elongation rates, we assigned stable RNAs the faster 85 nucleotides per second rate described by Bremer and Dennis 1996 (31) (the reason for this rate difference between stable and unstable RNA is unknown, but Bremer and Dennis suggest it may be related to differences in polymerase pausing). For the RNA polymerase active fraction, we simply used the theoretical maximum (=1). Moreover, two parameters could not be validated by the validation data (mRNA expression and mRNA half lives). In these two cases of highest variability, we used the parameter estimation method described above in this section (on page 65) to determine new parameter values. After either parameter swapping or redetermining, cell simulations were performed. The abundances of RNA polymerase and ribosome and the doubling times were then observed from the cell simulations.

We found that only after mRNA expression redetermination, cell simulations could simultaneously meet the expected RNA polymerase and ribosome abundances, and expected doubling time (Fig. S2A, column “mRNA Expression”). None of the other parameter changes simultaneously satisfied all criteria, suggesting that the growth-rate-compatible cell state produced by mRNA expression redetermination is the most supported representation of the cell (highlighted in Fig. 2F and G). The Pearson correlation coefficient and p-value shown in Fig. 2F were computed by the `scipy.stats.pearsonr` program from the SciPy package. The expected

experimental values shown in Fig. 2G (as orange lines) were determined from interpolation of the per-cell abundances (reported in (7)) of RNA polymerase and ribosome across doubling times. Interpolation was performed by the `interpolate.splrep` and `interpolate.splev` programs from SciPy.

For the validation comparisons made in Fig. 2H, we used the same sets of simulations for each medium that were used to generate Fig. 2D and Fig. S2C, with the new synthesis probabilities. The lengths of the error bars in the simulated values for all four plots indicate the standard deviations of each property calculated over the 1024 cells that were simulated for each medium. For the cellular properties plotted in Fig. 2H, the measured values (“experiment”) were obtained from (31), while the simulation values were calculated from the simulation outputs as follows:

- **RNA Mass:** The total mass of RNA at each simulation time step was directly extracted from the simulation outputs, and averaged over the duration of the cell cycle.
- **Number of origins at initiation:** The number of origins of replication at each simulation time step was directly extracted from the simulation outputs. Then, we extracted the number that corresponds to when chromosome replication was initiated in the simulation.
- **Ribosome elongation rate:** The effective elongation rate of ribosomes, defined as the number of amino acids elongated by an active ribosome per second, was directly extracted from the simulation outputs, and averaged over the duration of the cell cycle.
- **rRNA initiation rate:** The number of transcription initiation events for all ribosomal RNAs at each simulation timestep was directly extracted from the simulation outputs. Then, these numbers were divided by the length of each simulation timestep in seconds to yield the initiation rate. The resulting rates were summed up for all rRNAs, and averaged over the duration of the cell cycle. For proper comparison with the values reported in literature,



the units of the values were converted from 1/sec to 1/min, and divided by the number of rRNA types (=3).

We could also observe that by adjusting the expression of RNA polymerases and ribosomes, our simulations could recapitulate another experimental measurement that was not used to determine any parameters of our model. Scott et al., 2010 (32) showed that the RNA/protein mass ratio and the growth rate of *E. coli* cells always display a fixed linear relationship, regardless of the strain of *E. coli* used or the growth environment. To test whether our simulations agreed with this measurement, we additionally ran four generations of simulations with 256 random seeds for each media condition, using the raw parameters without adjustments in RNA polymerase and ribosome expression, and compared the results with the previous set of simulations run with adjusted parameters. Only the simulation results from the third and fourth generation of cells were selected to avoid bias from initialization. The results in Fig. S2D show that by adjusting these expression parameters, the mean values for the RNA/protein mass ratios and the growth rates calculated from our simulations move significantly closer to the proposed linear relationship. This comparison further verifies that the original set of parameters is unable to lead to balanced growth, and that our adjustments are able to resolve this discrepancy.

The same set of simulations were also used for the adder-sizer behavior comparison plots in Fig. S2E. Our model couples each chromosome replication initiation event to a cell division event which occurs after a fixed period of time for DNA replication and cytokinesis (the so-called C and D periods, occurring zero, one or two generations in the future depending on the growth rate), as inspired by recent work (33). We found that these simulations were capable of running for many generations with stable cell size distributions under multiple conditions - in dramatic contrast to our original *M. genitalium* model, which could only grow stably for one cell cycle (34). Again, among the four generations of simulations only the simulations from the third and fourth generation of cells were selected to avoid bias from initialization. From

each simulation output, the initial mass of the cell was subtracted from the final mass to compute the added mass of the cell, and was normalized by the mean of all added masses to yield normalized added masses. Likewise, the initial masses extracted from the simulation outputs were normalized by the mean initial mass to yield normalized initial masses. The resulting plot shows that our simulation displays adder behavior under fast growth conditions (minimal glucose plus 20 amino acids), and sizer behavior under slower growth conditions (minimal glucose and anaerobic minimal glucose), in agreement with observations by recent studies (4, 5, 33, 35)

In Fig. S2F, we directly compared the cell size outputs of our model to Figure 7B of Wallden et al., 2016 (33), where the authors plotted the birth and added volumes of *E. coli* MG1655 strain JJC5350 growing under three different nutrient conditions. Our simulations were able to qualitatively reproduce the observed adder-sizer behavior in this figure just as they did in Figure S2E - there was a higher correlation between the birth and added volumes for cells under slower growth - but the quantitative values for the cell volumes did not compare well to experimental data. This is mainly because the cell volumes of our model are calculated from parameters measured for *E. coli* strain B/r, which was shown to have a significantly smaller cell volume compared to strain MG1655 which was used by the referenced experiment. Additionally, the experiment used different nutrient conditions than the three upon which our model is based, further preventing us from making a meaningful comparison.

### **1.2.3 Analysis of the metabolic network sub-model. (Related to Fig. 3 and Fig. S3.)**

The consistency of the metabolic network and reaction kinetic parameters was assessed in Fig. 3 and Fig. S3. Plots for these figures were obtained as follows:

**CdsA downstream metabolite concentrations.** The concentrations of the metabolites phosphatidylethanolamine (PE) and phosphatidylglycerol (PG) in Fig. 3A were determined using the metabolite counts from eight cells, each simulated through 32 division cycles. The

concentration at each time step was calculated as follows:

$$\text{Metabolite Concentration} = \frac{\frac{1}{\text{Avogadro's Number}} \cdot \text{Metabolite Counts}}{\frac{1}{\text{Cell Density}} \cdot \text{Cell Mass}} \quad (67)$$

where the metabolite counts, cell density and cell mass were extracted directly from the simulation outputs. “Low CdsA” indicates simulations were run with the original CdsA half-life of 2 minutes, while “High CdsA” indicates simulations were run with the updated CdsA half-life of 10 hours.

**Glucose Yield** Glucose yield (Fig. 3B and 3G) was determined at each time step from simulations of four cells, each simulated for one division cycle. It was calculated as follows:

$$\text{Yield} = \frac{\frac{\text{Mass Added}}{\Delta t}}{\text{Glucose Uptake Rate} \cdot \text{Cell Dry Mass}} \quad (68)$$

where Mass Added is the mass added to the cell in a time step,  $\Delta t$  is the length of the time step, Glucose Uptake Rate is the glucose flux, and Cell Dry Mass is the dry mass of the cell at the given time step, which are all taken from the simulations. “Disabled Succ/Fum Constraints” indicates the simulations were run with all kinetic constraints enabled, except for those for tRNA synthetases, succinate dehydrogenase and fumarate reductase. “Enabled Succ/Fum Constraints” indicates the simulations were run with all kinetic constraints enabled, except for those for tRNA synthetases. “New Disabled Constraints” indicates the simulations were run with all kinetic constraints except for those for tRNA synthetase, succinate dehydrogenase, NADH dehydrogenase, inorganic pyrophosphatase, glutathione reductase, isocitrate dehydrogenase and glyoxylate reductase. See Main Text and Section 1.1.6.7 for more details on the constraints selected.

**Fluxome Validation.** To validate the model flux with data that was not included in the model, we compared the model fluxome to a measured fluxome dataset (22) in Fig. 3C and 3H. The simulated flux is the average flux through each reaction over time within a selected cell cycle. Error bars show the standard deviation for the simulated and measured fluxome. Correlation values were determined with (blue and orange) and without (blue only) the identified outlier reactions.

**Single constraint flux impact.** To determine the impact of perturbing the kinetic reaction target in the metabolic objective on the flux through either outlier reactions identified from the fluxome validation (succinate or isocitrate dehydrogenase), the following global analysis was performed (Fig. 3D). A simulation was run for 10 seconds; at each time step, the metabolism linear optimization problem was solved with all but one reaction target included (ie. solved  $n$  times, each time with one of  $n$  reaction targets excluded). This strategy results in a different flux solution for each optimization problem, which reveals the impact of removing a single target. Specifically, identifying the constraints that reduce the previously identified outlier fluxes (succinate and isocitrate dehydrogenases) towards their measured values upon perturbation suggests where kinetic parameters may be inconsistent. The relative change in the desired flux (e.g. succinate dehydrogenase, Fig. 3D, or isocitrate dehydrogenase, Fig. S3H) at each time step,  $t$ , can then be determined:

$$v_{rel,i}^t = \frac{v_{-i}^t - v_{all}^t}{v_{all}^t} \quad (69)$$

Where  $v_{rel,i}^t$  is the relative flux change when removing the target for reaction  $i$ ,  $v_{-i}^t$  is the flux of interest when all targets except reaction  $i$  are included in the objective and  $v_{all}^t$  is the flux of interest when all targets are included in the objective.

Finding the average relative flux,  $v_{rel,i}$ , for each reaction over the simulation results in a

distribution. A z-score (Fig. 3D),  $z_i$ , for each reaction can then be determined by finding the mean,  $\mu_{v_{rel}}$ , and standard deviation,  $\sigma_{v_{rel}}$ , for all  $v_{rel,i}$ .

$$v_{rel,i} = \frac{\sum_t v_{rel,i}^t}{\# \text{ times steps}} \quad (70)$$

$$z_i = \frac{v_{rel,i} - \mu_{v_{rel}}}{\sigma_{v_{rel}}} \quad (71)$$

where a negative z-score for a reaction indicates that removing its target from the kinetic objective results in a lower flux for the flux of interest.

**Factorial design for constraint interactions.** Individual effects identified with the z-score above does not reveal the interaction effects between kinetic target effects on fluxes of interest so a factorial design experiment was performed to identify any potential interactions between identified kinetic constraints Fig. 3E). A set of 256 constraint conditions (all the combinations of including or removing each of the eight kinetic constraints) were simulated, with four cells for one division cycle for each constraint condition. Glucose uptake flux was computed directly from the simulation, taken as an average over the course of all simulations for a given constraint condition. The comparison to validation data is calculated from the simulation and validation data:

$$\log_2 \frac{\text{Simulation Flux}}{\text{Validation Flux}} \quad (72)$$

where Simulation Flux is the average succinate dehydrogenase flux from all simulations for a given constraint condition and Validation Flux is the succinate dehydrogenase flux from the literature (22).

**$k_{cat}$  predictions from simulations.** Using the simulated fluxes, and concentrations of enzymes and metabolites, a predicted  $k_{cat}$  (Fig. 3F) can be determined at each time step:

$$k_{cat} = \frac{\text{Simulation Flux}}{\text{Enzyme Concentration} \cdot \text{Enzyme Saturation}} \quad (73)$$

where Simulation Flux is the flux for the given reaction, Enzyme Concentration is the concentration of the catalyzing enzyme for the given reaction and Enzyme Saturation is:

$$\text{Enzyme Saturation} = \begin{cases} \frac{\text{Metabolite Concentration}}{K_M + \text{Metabolite Concentration}} & \text{if } K_M \text{ and Metabolite Concentration are available} \\ 1 & \text{otherwise} \end{cases} \quad (74)$$

where Metabolite Concentration is the concentration of a metabolite with a known  $K_M$  value and  $K_M$  is a curated Michaelis-Menten constant for the given reaction. If a  $K_M$  value or metabolite concentration is not available, the enzyme is assumed to be fully saturated for this calculation.

This analysis is meant to assess how well the new model with relaxed constraints fits the values reported in literature. The calculated  $k_{cat}$  values could also be affected by metabolite concentrations, curated  $K_M$  values and protein expression but for purposes of comparing the reported  $k_{cat}$  values and the model output, it is assumed that enzyme concentration and enzyme saturation are accurate.

Along these same lines, similar distributions could have been generated for metabolite concentrations,  $K_M$  values and protein expression (data not shown) but with important caveats. For example, metabolite concentrations and  $K_M$  are not as widely reported in literature for all the reactions of interest, meaning that the comparison would be less comprehensive. Moreover, protein expression datasets are often more consistent with each other than reported  $k_{cat}$  values, which can vary by an order of magnitude or more and have difficulties in obtaining

measurements representative of *in vivo* conditions. Thus the insights to be gained by comparing simulation output to proteomics data are likely to be relatively limited.

**Normalized Growth.** To produce the plot in Fig. 3I, S3A and S3B, the masses of different cell fractions (protein, tRNA, rRNA, mRNA, DNA and small molecules) were normalized to the starting masses of the respective fraction at each time point.

**Flux PCC.** To compare the flux values that would have been calculated using Michaelis-Menten kinetic equations (“Target Flux”) with the values obtained by the simulation (“Simulated Flux”) in Fig. 3J, S3C and S3D, we used the kinetic parameters, together with the enzyme and small molecule concentrations where applicable, to calculate the target flux for each time point of each cell cycle. The simulated flux at each time point was obtained directly from the simulation. These were then averaged over all time points and cells. The Pearson correlation between the log of the average target flux ( $+10^{-6}$  to prevent  $\log(0)$ ) and the log of the average simulated flux ( $+10^{-6}$ ) was determined for each weighting parameter set. The correlation was determined for all reactions (blue and gray) and for only reactions with a non-zero simulated flux at some point in the simulation (blue only).

**Determining value of the kinetic weighting parameter.** To determine an appropriate tradeoff between the homeostatic and kinetic objectives in the metabolism optimization problem, we ran ten simulation sets, where each set contained eight separate simulations of a cell over eight generations. As described above, one daughter cell was chosen to continue at each division, such that each simulation included eight life cycles. Each simulation had its own random seed. Each of the simulation sets was run with a different weighting for the kinetics part of the objective ( $\lambda$ ), and the homeostatic weighting was always set equal to  $1-\lambda$ . The optimal value of  $\lambda$  was determined by maximizing an objective function that included various metrics that are

expected to tradeoff as the weighting changes. All values were normalized to be between 0 and 1 and weighted equally in the objective. The metrics selected can be grouped as related to satisfying the homeostatic objective (viable sims, growth rate, concentration correlation and concentration deviations) or satisfying the kinetic objective (flux correlation, flux deviations, nonzero flux correlation, nonzero fluxes and validation correlation). As seen in Fig. S3A and S3B, increasing  $\lambda$  causes the cell to fail to meet the homeostatic objective and as a result growth suffers. As seen in Fig. S3C and S3D, increasing  $\lambda$  also increases the number of reactions that have non-zero flux so that additional information (in the form of kinetic parameters and fluxes) can be contained in the model. The results shown in Fig. 3I and 3J show that the value of  $\lambda$  selected through this objective produces desired results related to both the homeostatic and kinetic objectives. The objective to determine the value of  $\lambda$  can be formalized as below with values coming from simulations at different values of  $\lambda$  as shown in Fig. S3E:

$$\max_{\lambda} (v + \mu + r_{conc} + f_{conc} + r_{flux} + f_{flux} + r_{nonzero} + f_{nonzero} + r_{val})$$

$$\text{Viable sims: } v = \frac{n_{viable\_sims}}{n_{total\_sims}}$$

$$\text{Growth rate: } \mu = \frac{\mu}{\mu_{expected}}$$

$$\text{Concentration correlation: } r_{conc} = \text{pearson}(\bar{C}, C_o)$$

$$\text{Concentration deviations: } f_{conc} = 1 - \frac{n_{conc\_off\_axis}}{n_{total\_conc}}$$

$$\text{Flux correlation: } r_{flux} = \text{pearson}(\bar{v}, v_o)$$

$$\text{Flux deviations: } f_{flux} = 1 - \frac{n_{flux\_off\_axis}}{n_{total\_fluxes}}$$

$$\text{Nonzero flux correlation: } r_{nonzero} = \text{pearson}(\bar{v}, v_o)$$

$$\text{Nonzero fluxes: } f_{nonzero} = \frac{n_{flux>0}}{n_{total\_fluxes}}$$

$$\text{Validation correlation: } r_{val} = \text{pearson}(\bar{v}, v_{val})$$



**Objective Tradeoff.** The plot in Fig. S3F shows the value for each objective component (homeostatic and kinetics) at each kinetic weighting parameter. The objective components were averaged across all time points and cells within each set of simulations that had a different weighting parameter.

#### 1.2.4 Sub-generational expression analysis (related to Fig. 4 and Fig. S4).

To perform the sub-generational expression analyses depicted in Fig. 4, we performed a simulation of 32 generations of log-phase growth on glucose minimal media under aerobic conditions (with one daughter selected at the end of each cell cycle as before). The panels in Fig. 4 all arise from these simulated generations.

**Independent validation - comparison to proteome data previously withheld from model construction.** To perform a global comparison of simulation-predicted protein expression with a proteomics dataset that was withheld from model construction (Fig. 4A), we first obtained the measured values as given in Schmidt et al. Table S5, Column H (Glucose) (11), and determined the  $\log_{10}$  of the average count per cell (after incrementing by +1 to avoid  $\log_{10}$  of zero) for each protein. To obtain the simulated values, we used the first generation of the simulation set described above, and determined the  $\log_{10}$  (again, after incrementing by +1) of the average count per cell as a time average over the course of the cellular life cycle. The  $R^2$  values were calculated for the log-transformed data separately for the two groups of proteins: For the highly abundant proteins whose measured counts are greater than or equal to 30,  $R^2$  was equal to 0.614. For the low-abundance proteins with measured counts less than 30,  $R^2$  was equal to 0.015. The average log deviations of simulated counts from the measured counts were 2.477 and 1.667, respectively, for the two groups of proteins.

**Dynamics of exponential and sub-generational transcription over multiple generations.** For Fig. 4B, examples of exponentially and sub-generationally transcribed genes were found by computing ratios of the final count of proteins to the initial count of proteins. Examples of exponential dynamics were identified by filtering for proteins with ratio values between 1.6 and 2.4 for each generation of a 6-generation long window. Examples of sub-generational dynamics were identified by filtering for proteins with ratio values less than 1.1 in the first generation, greater than 10 in the second generation, and less than 1.1 in the remaining generations of the same 6-generation long window. For the 6-generation window analyzed, 30 suitable examples of exponential dynamics and 31 suitable examples of sub-generational dynamics were found; one of each was chosen to illustrate this concept.

**Global assessment of sub-generational gene expression.** To determine the frequency of observing at least one transcript per generation for all translatable genes in the genome, the simulation set was used to obtain time series data for the mRNA counts. Each mRNA time series was then assessed, generation by generation, to determine whether the mRNA count was ever positive during that cell cycle. The result was a number between 0 and 32 which gave the number of generations with a non-zero mRNA count. This was divided by the total number of generations - 32 - to obtain the frequencies shown in Fig. 4C.

The distribution of essential genes into transcriptional frequency groups shown in Fig. 4D was generated analogously, but only for genes considered to be essential under minimal glucose media by Baba et al. (36) and Joyce et al. (37). Details on how this list of essential genes was curated is described in the paragraph below. The protein absence plot shown in Fig. 4E was generated by observing the counts of the functional units that are generated from sub-generationally transcribed genes. These functional units include 1915 protein monomers that do not form protein complexes, and 504 protein complexes that are formed from monomers

produced from sub-generational genes. The same list of essential genes was used to determine the essentiality of each functional unit and plot the blue bars in Fig. 4E. Note that a protein complex was considered to be essential if any of its subunits are produced from essential genes that are sub-generationally transcribed. Table S4 shows the full list of essential genes whose protein product (monomer or complex) is absent at least once during the 32-generation simulation.

**Determining gene essentiality.** For Fig. 4D and Fig. 4E, we used a list of 406 genes that were shown to be essential for the growth of *E. coli* cells under minimal glucose media by experiments. The list was curated based on the data in Baba et al., 2006 (36), with some modifications to more accurately determine essentiality under our simulation conditions. First, all 300 annotated genes (for strain MG1655) that were shown to be essential for growth in rich LB media by Baba et al. were included in this list. This assumes that genes that are essential for growth under rich media will also be essential for growth under minimal media. Next, 119 genes that were labeled as being conditionally essential under glucose minimal media by Joyce et al., 2006 (37) were added to this list. These 119 genes were labeled as such because the knockout strains of these genes were able to grow in LB but displayed the slowest growth under glucose minimal media according to Baba et al. Among these conditionally essential genes, 13 genes that were assumed to be false positives by Joyce et al. (see Figure 5 of the main text) were excluded from the list. These genes are *aceF*, *atpE*, *dnaT*, *lipA*, *lipB*, *lpd*, *pfkA*, *priA*, *ptsH*, *ycaL*, *argB*, *argC*, and *metE*.

**Downstream effects of sub-generational transcription.** For Fig. 4F, the transcription events from the *pabA* and *pabB* promoter, as well as the resulting counts of mRNA, PabA and PabB monomers, the PabAB heterodimer, and the final reaction flux, were all obtained directly from the simulation. The counts of the final product metabolite, 5,10-methylene-THF, were also obtained directly from the simulation.

**Sensitivity of the 5,10-methylene-THF depletion phenotype to *pabB* mRNA transcript synthesis probability.** To show that the PabAB heterodimer and 5,10-methylene-THF depletion phenotypes we observed in Fig. 4F depend on the synthesis probability of the mRNA transcripts, we performed a parameter sweep analysis above and below the wild-type transcription probability of *pabB* (Fig. S4). Each of the nine parameter values simulated (shown along the x-axis) was assessed by eight trials of eight generation-long simulations – with each of the eight trials initialized on a different random seed – totaling to a set of 576 (i.e., 9 parameter values  $\times$  8 trials  $\times$  8 generations) simulations of log-phase growth on glucose minimal media under aerobic conditions. Average fraction of time with zero counts of the PabAB complex, and average fraction of time with 5,10-methylene-THF products below 0.1% of their wild-type target concentrations, were determined and plotted in Fig. S4.

### 1.2.5 Protein steady-state analysis (related to Fig. 5A)

The steady state analysis was performed to compare expected model output to a validation dataset that was not used in the construction of the model. With the expectation that the model will approach steady state protein concentrations that match the validation proteomics dataset, the difference between the rate of production expected using model parameters (x-axis) and rate of loss using model parameters but at protein concentrations from the validation dataset (y-axis) should be 0. Differences between the rates will result in the model reaching a different steady state concentration than the validation dataset, which suggests discrepancies in the parameters or validation data. The rate of change of protein concentration was described as:

$$\frac{dp}{dt} = e_r \cdot r \cdot RIB \text{ :: } RNA_{aff} \cdot RIB_{act} - \left( \frac{\ln(2)}{t_{1/2}} + \frac{\ln(2)}{\tau} \right) p$$

where the positive term on the right side is the production rate, the negative term is the loss rate, and the variables and their sources are described below:

| Variable           | Description                                               | Source or Value                      |
|--------------------|-----------------------------------------------------------|--------------------------------------|
| $e_r$              | ribosome elongation rate                                  | Bremer & Dennis 1996 (31)            |
| $r$                | RNA concentration                                         | This Study                           |
| $RIB :: RNA_{aff}$ | translational efficiency                                  | Li et al. 2014 (10)                  |
| $RIB_{act}$        | fraction of active ribosomes                              | Bremer & Dennis 1996 (31)            |
| $t_{1/2}$          | protein decay rate                                        | Tobias et al. 1991 (N-end rule) (12) |
| $\tau$             | doubling time                                             | 45 minutes                           |
| $p$                | protein concentration<br>(Not used in model construction) | Schmidt et al. 2016 (11)             |

Note that only genes for which all the data was available (i.e. genes that had RNA-sequence data (this study), translational efficiencies (10), and proteomics data (11)) could be included in this comparison.

The outliers highlighted in Fig. 5A (excluding CdsA, which was identified for further investigation earlier in the main text) were chosen based on the highest discrepancy between the production and loss rates (not including the genes related to ribosomal or RNA polymerase subunit expression).

The plots for Fig. 5B, 5C, and S5 are described in more detail in Section 1.3.

## 1.3 Experimental Methods

### 1.3.1 RNA Sequencing and Analysis

RNA sequencing was performed on MG1655 cells grown in two different environments, in triplicate: (1) M9 minimal media (48.8 mM Na<sub>2</sub>HPO<sub>4</sub>, 22 mM KH<sub>2</sub>PO<sub>4</sub>, 8.6 mM NaCl, 18.7 mM NH<sub>4</sub>Cl, 2 mM MgSO<sub>4</sub>, 0.1 mM CaCl<sub>2</sub>) with 0.4% Glucose or (2) M9 minimal media with 0.4% Glucose supplemented with amino acids (5x Supplement EZ without VA Vitamin Solution), prepared as has been described (38).

Cells were grown overnight in requisite media at 37°C, on a platform shaker. In the morning, cultures were back diluted to an OD<sub>600 nm</sub> 0.02 in 10 mL of media contained in a 125 mL flask, and were grown up at 37°C, on a platform shaker. Cells were harvested at OD<sub>600 nm</sub> 0.4. Total

RNA was extracted from 2 mls of each culture using Qiagen RNAeasy Protect Bacterial Mini Kit (Qiagen #74524) with RNAprotect Bacteria Reagent (# 76506) and RNase-Free DNase Set (# 79254) according to manufacturer's instructions. Performed cell lysis using lysozyme from ThermoScientific #90082. NanoDrop was used for RNA quantification. rRNA depletion was performed using RiboZero rRNA Removal Kit (Epicentre # MRZGN126), according to manufacturer's instructions. RNA quality, prior to sequencing, was assessed using an Agilent 2100 BioAnalyzer (# G2938C), according to manufacturer's instructions by the SFGF facility at Stanford University.

Library prep was performed by the SFGF facility at Stanford University according to the TruSeq Stranded Total RNA Sample Preparation Guide. Paired-end sequencing with read lengths of 75 bp was performed by the SFGF facility at Stanford University on an Illumina NextSeq 500. Approximately 20 million reads were obtained per sample.

BBMap 34.33 was used to pre-process sequencing data to trim reads, remove reads for common contaminants, and remove reads that map to non-coding RNA (39). RSEM 1.2.19 was used for downstream processing and calculation of gene expression (40). Sequencing data is available at GEO with accession number GSE85472.

### **1.3.2 Protein Half-Life Measurement**

Plasmids encoding his-tagged genes of interest (from the ASKA library without GFP (41)) were transformed into MG1655 (See Table S5 for plasmids used). Duplicates of bacterial cultures were grown overnight at 37°C in M9 minimal media with 0.4% glucose and 20 µg/mL chloramphenicol for plasmid selection. In the morning, bacterial cultures were diluted to OD<sub>600 nm</sub> 0.03, and incubated at 37°C until they reached OD<sub>600 nm</sub> 0.3. At this point, bacterial cultures were diluted 1:2 in minimal media supplemented with IPTG (0.1mM) to induce protein over-expression. Cultures were grown on a shaker in a 37°C warm room for the requisite time of

induction.

After the requisite time of IPTG induction (see Table S5), a 9 mL sample was taken to measure the time 0 protein level. Then, 10  $\mu\text{g/mL}$  tetracycline (the 10 mg/mL stock was made in 95% ethanol) was added to the rest of the culture to inhibit protein synthesis. Culture was then returned to 37°C. 9 mL samples were taken at indicated time points (10 min on ice followed by centrifugation for 10 min at 4000g, 4°C) to measure protein levels (see Table S5). At each time point, culture  $\text{OD}_{600\text{nm}}$  was measured. Cells were lysed using BugBuster Master mix (Millipore, #71456-3) supplemented with Halt protease/phosphatase inhibitor cocktail (Thermo Scientific #78444), following the manufacturer's instructions.

Protein quantification was performed using Pierce BCA protein assay kit (Thermo Scientific #23225), following the manufacturer's instructions.

For western blot detection of proteins we ran samples on a Simon machine (Protein Simple) following manufacturer's instructions, and standard kit components (Protein Simple, Core Kit #CBS201, Mouse Master Kit #Simon-02-01). An anti-His tag antibody (Novus Biologicals #NB100-64768) was used for protein detection and an anti-RNAP  $\beta$  antibody (BioLegend #663006) for capillary normalization (loading control).

The measured amount of His-tagged protein ( $N_p$ ) was normalized by the amount of  $\beta$  subunit RNAP loaded as a protein control ( $RNAP$ ), i.e.  $N = N_p/RNAP$ ; and then log-transformed. Linear regression was used to determine the first-order decay rate constant ( $k_d$ ) as follows:

$$N = N_0 \exp(-k_d t), \log(N) = \log(N_0) - k_d t \quad (75)$$

The half-lives in Fig. 5 and Fig. S5 (control experiments, see figure legend) were then estimated by:  $t_{1/2} = \log(2)/k_d$ .

### 1.3.3 Immunofluorescence

MG1655 was transformed with His-tagged gene plasmids (from the ASKA library without GFP (41)) for CdsA and RpoH. Cells were grown, induced with IPTG, and treated with tetracycline as per the protein half-life measurements carried out by western blotting. At the indicated timepoints (Figure 5C, Supplemental Figure 5B, 5C and 5D) 900  $\mu$ l of sample was taken and combined with 300  $\mu$ l of 16% PFA (Fisher, PI-28906) for 20 minutes at room temperature. Samples were centrifuged for 2 minutes at 6000 rpm at room temperature. Pellets were resuspended in 1 ml of PBS, centrifuged, and this process repeated twice before resuspending in 500  $\mu$ l of PBS. A glass bottom 96 well plate (Fisher Scientific, 164588) was coated with a 0.1% solution of poly-L-lysine (Sigma, P8920) for 1 hour at 37°C and rinsed three times with PBS. Cells were added to the plate at a 1:250 dilution, centrifuged for 5 minutes at 1000 rpm, and rinsed three times with PBS. Cells were then treated as follows with PBS washes between each step: 30 minutes in 0.1% Triton, 45 minutes in 100  $\mu$ g/ml lysozyme (Pierce, 90082) and 5mM EDTA, 30 minutes in 0.1% Triton, 30 minutes in 3% BSA (Sigma, A7906) and 5% donkey serum (Jackson Immunoresearch (017-000-121), 1 hour in anti-His tag antibody (Novus Biologicals, NB100-64768) at 1:200 dilution, 1 hour in secondary antibody (Jackson Immunoresearch, 715-625-151) at 1:200 dilution, 5 minutes in DAPI. Images were acquired using a Nikon Eclipse Ti fluorescence microscope controlled by Micromanager and using a 60x oil objective with a 1.5x tube lens and 2x2 binning.

### 1.3.4 Absolute-Quantative PCR

MG1655 cells were grown overnight in M9 + 0.4% glucose at 37°C, then back diluted to OD<sub>600 nm</sub> 0.02 in the morning. When cells got to an OD<sub>600 nm</sub> 0.2, they were back diluted again to OD<sub>600 nm</sub> 0.02 and grown to OD<sub>600 nm</sub> 0.4. At this point Total RNA was extracted using the Bacterial RNeasy Protect Bacteria Mini Kit (Qiagen, 74524), according to manufacturers in-



structions (with on-column DNase treatment (Qiagen, 79254). From total RNA, cDNA was generated using iScript Reverse Transcription Supermix (Biorad, 1708840) according to manufacturers instructions, with 500 ng of input RNA. For absolute quantitative qPCR, standards were created by PCR amplification of the constructs using the same primers used for qPCR. The resultant DNA fragments were then run on a gel and extracted using the QIAquick gel extraction kit (Qiagen, 28704). Standards were diluted to a range of  $10^{-1}$ - $10^7$  counts/ $\mu$ L, to create a standard curve, by the following equation:  $\text{molecules}/\mu\text{L} = \frac{\text{DNA} * 10^{-9} \text{g/L}}{\text{fragment length} * 660 \text{g/mol}} \cdot 6 * 10^{23} \text{molecules/mol}$ . qPCR was run using iTaq Universal SYBR (BioRad, 1725120) according to manufacturers instructions using a quantity of cDNA that corresponds to 5 ng of input Total RNA. The results for the standards were fit to a line, and an equation was found. The counts of target RNA were calculated according to the following equation:  $\text{counts} = 10^{(CT-b)/m} \cdot 2$ . Results were multiplied by 2 since 2  $\mu$ L of input cDNA was added for each standard. A total of three independent biological replicates were run.

## 2 Supplemental Figures

Figure S1

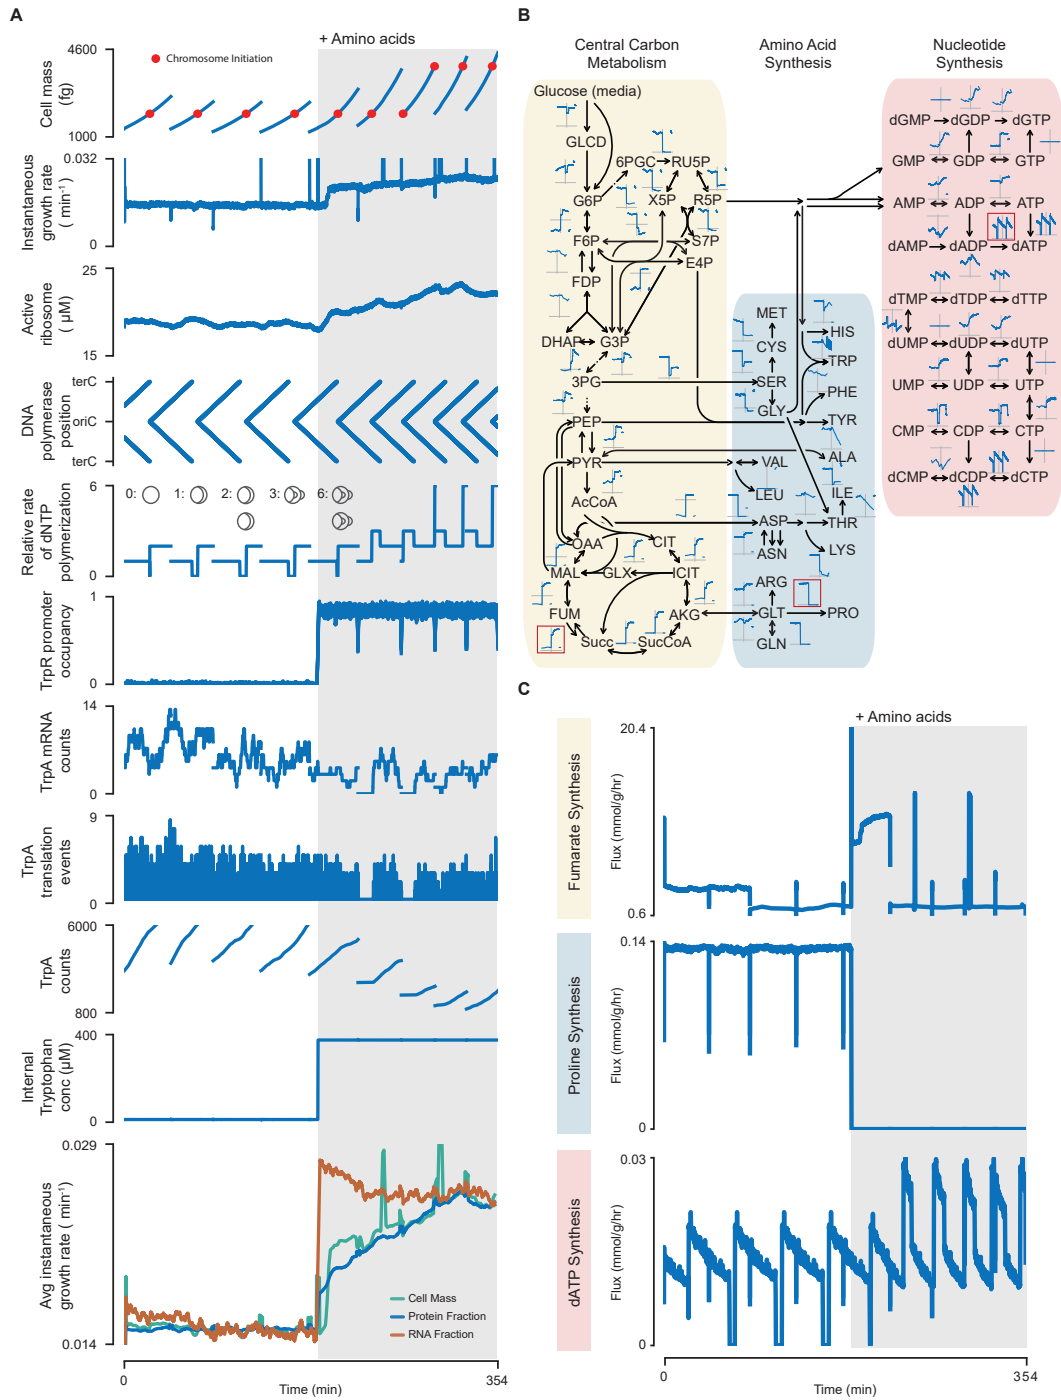

**Fig. S1. Fully integrated output from model simulations of several generations of cellular growth on aerobic glucose minimal media, followed by an environmental shift in which amino acids are added to the medium.** This figure represents a detailed expansion of the plots shown at the bottom of Fig. 1; note also that the output shown in Fig. 1 and Fig. S1 is only a small fraction of the models output. (A) Plot showing how, as amino acids are added to the medium, the growth rate (“Cell Mass” and “Instantaneous Growth Rate”), number of active ribosomes (“Active Ribosome”) and DNA replication rate (“DNA polymerase position”, “Relative Rate of dNTP Polymerization”, see also the red circles in “Cell Mass”) all increase in response to the shift. The underlying mechanism of these events is also modeled; as an example, the shift leads to an increased internal concentration of tryptophan (“Internal TRP conc”), activating the tryptophan biosynthesis repressor TrpR, which then occupies the promoter of biosynthesis enzyme TrpA (“Promoter Occupancy”), decreasing the average counts of the cognate mRNA (“TrpA mRNA counts”) and monomer (“TrpA monomer counts”, see also “Translation Events”). At bottom, we show that the growth rates of different cell fractions are balanced before a shift but become unbalanced following a shift before returning to balanced growth at a new growth rate. (B) The metabolic flux distributions for central carbon metabolism over several generations, as taken from the same set of simulations. The dynamic changes in each flux are shown for each reaction. (C) Flux dynamics of the three reactions highlighted by red boxes in (B) are shown in detail. Time simulated after the environmental shift to amino acid supplementation is represented by the gray region. See also Movie S2. Full details of the analysis required to generate this figure, as well as a pointer to the generating code, can be found in Section 1.2.

Figure S2A

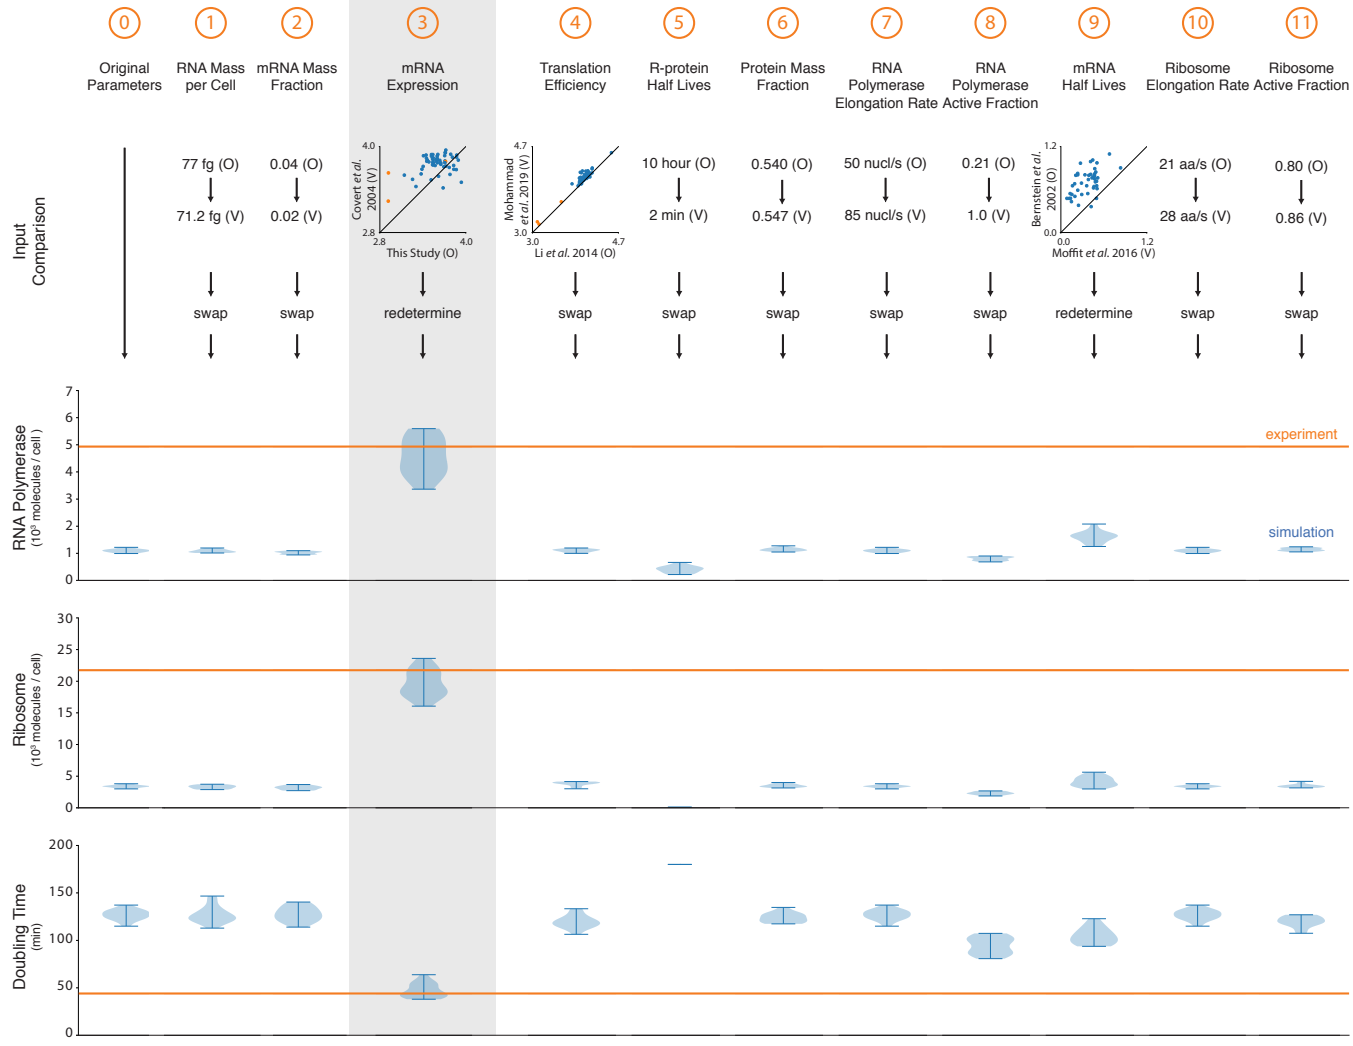

**Fig. S2A. Parameter variability investigation.** Parameters identified in Fig. S2B were investigated for their potential impact on RNA Polymerase and Ribosome abundances, and cell doubling time. The “Input Comparison” row shows the original data (O) used in this study and the validation data (V). Data sources are listed in Table S2A. The data shown for mRNA expression (rna-sequencing), translation efficiency (ribosome density), and mRNA half lives (minutes) are log base 10 transformed values compared on linear axes. Ribosomal proteins (blue) and RNA Polymerase subunits (orange) are highlighted. Parameter values that agreed well with the validation data were swapped with the validation data. Parameter values that did not agree well with the validation data justified a redetermination opportunity which was performed via iterative parameter estimation programs (described in Section 1.2.2) that adjust the mRNA expression (in column three) or mRNA half lives (in column nine) of RNA polymerase subunits and ribosomal proteins. After either a “swap” or “redetermine”, 32 cells (8 seeds, 4 generations) were simulated for each column. The abundances of total RNA Polymerase per cell, total Ribosome per cell, and doubling time were identified from the simulations and are depicted as violin plots. As in Fig. 2A (in the main text), the third and fourth generations participate in this analysis. The expected values were determined from interpolation of the per-cell abundances of RNA Polymerase and Ribosome across doubling times (7), and are depicted as orange lines. Interpolation was performed by the `interpolate.splrep` and `interpolate.splev` programs from SciPy. The numbers circled in orange correspond to the parameter number annotated in Fig. S2B and Table S2A. Full details of the analysis required to generate this figure, as well as a pointer to the generating code, can be found in Section 1.2.

Figure S2B

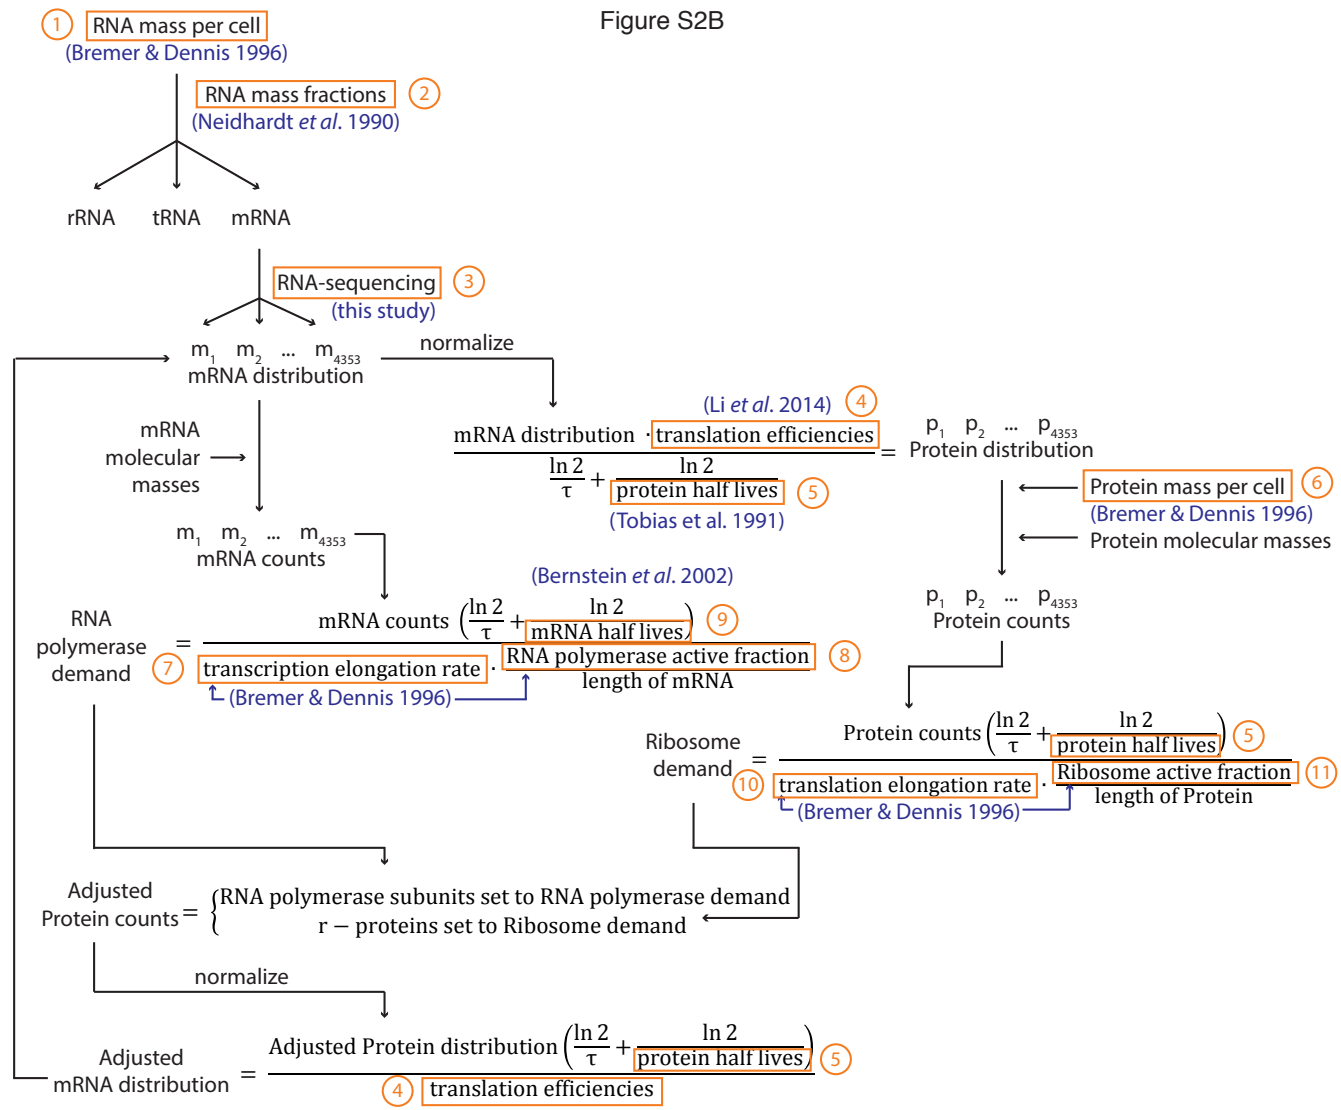

**Fig. S2B. Iterative parameter estimation approach.** Flow chart depicts all parameters participating in the iterative parameter estimation approach described by Equations 59 through 64 and used to generate the cell state in Fig. 2D. A measurement of the total RNA mass per cell is partitioned into masses for each RNA type utilizing RNA mass fraction data. The total mRNA mass is further partitioned into the masses of each (gene-specific) mRNA type using RNA-sequencing data. From here, the flow chart splits into two branches: RNA polymerase demand determination (down) and Ribosome demand determination (right). **RNA polymerase branch:** The number of molecules of each mRNA type (one corresponding to each of the 4353 genes) is determined from the mRNA mass distribution and the molecular masses of each mRNA type according to Equation 2. Then, the number of RNA polymerase molecules required to sustain steady-state growth (ie. doubling of all RNA molecules) is determined from Equation 59. **Ribosome branch:** The protein distribution is determined from the normalized mRNA distribution, translation efficiencies, protein half lives, and doubling time as described in Algorithm 2, Step 3. The number of molecules of each protein monomer (one corresponding to each of the 4353 transcripts) is determined from the protein distribution, the molecular masses of each protein monomer, and the total mass of protein per cell according to Equation 2. Then, the number of ribosome molecules required to sustain steady-state growth (ie. doubling of all protein molecules) is determined from Equation 59. **Adjusted protein counts:** The numbers of RNA polymerase and ribosomes determined in the previous two branches is converted to numbers of RNA polymerase subunits and ribosomal proteins using the stoichiometry of the RNA polymerase and ribosome. The number of molecules of each of these protein monomers is then updated in the “Protein counts” array determined previously in the “Ribosome branch”. The updated “Protein counts” are then normalized and projected back to the mRNA distribution according to the equation presented in Algorithm 2, Step 3 - rearranged to solve for the mRNA distribution. This mRNA distribution replaces that determined previously, and iterations con-

tinue until the mRNA distribution converges according to the terminal condition described by Equation 64. Parameters indicated in orange were identified as potential sources of data variability and investigated further in Fig. S2A. The numbers circled in orange correspond to the parameter number annotated in Fig. S2A and Table S2A. Original data sources are annotated in blue, and correspond to the “Original Data Source” column in Table S2A. Full details of the analysis required to generate this figure, as well as a pointer to the generating code, can be found in Section 1.2.



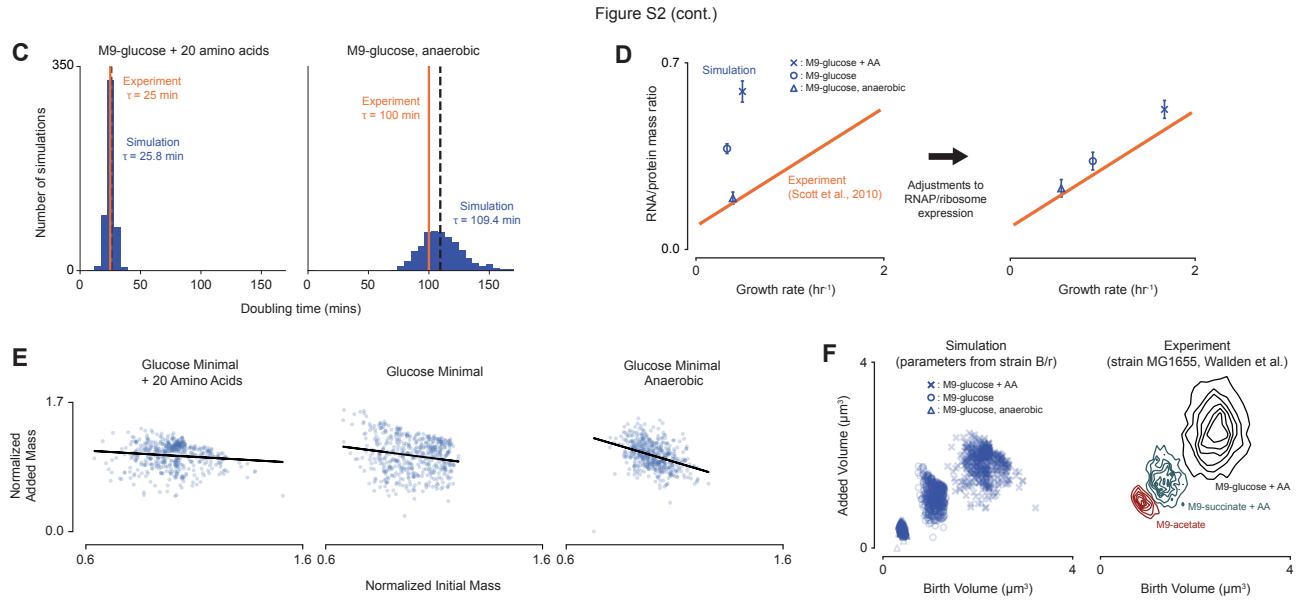

**Fig. S2. (continued)** (C) Histograms comparing simulated doubling times (blue) to the experimentally determined doubling time (orange line) for aerobic growth in glucose minimal media supplemented with 20 amino acids (left), and anaerobic growth in glucose minimal media (right). Median simulated doubling times are reported (dashed black lines). Both histograms are generated from simulation data using RNA polymerase and ribosome expression calculated from the known doubling time. (D) Comparison of the relationship between the RNA/protein mass ratio and the growth rate predicted by our simulations under the three simulated environments (blue), and the linear relationship that was experimentally determined by Scott et al., 2010 (32) (orange). Before adjusting the expression of RNA polymerases and ribosomes (left), our simulations do not agree well with experimental measurements; after the adjustment is made (right), the values from our simulations fall closer to the proposed linear relationship. (E) Comparisons of the normed initial and added mass indicates that the simulations generate adder behavior in the glucose minimal media plus amino acid condition (slope =  $-0.17$ ,  $R^2 = 0.014$ ,  $p = 6.5 \times 10^{-3}$ ), and sizer behavior in glucose minimal and anaerobic glucose minimal conditions (slope =  $-0.37$ ,  $R^2 = 0.036$ ,  $p = 2 \times 10^{-5}$  and slope =  $-0.84$ ,  $R^2 = 0.14$ ,  $p = 2.3 \times 10^{-18}$ , respectively). These results match observations by recent studies (4, 5, 33, 35). (F) Comparison of the distribution of birth volumes and added volumes predicted by our simulations and the experimental distributions reported by Wallden et al., 2016 (33). The simulations are able to qualitatively capture the adder-sizer behavior observed in the experiments, but the quantitative values for the cell volumes do not compare well to the experiments due to differences in strains and growth environments. Wallden et al. used strain MG1655 for their measurements, whereas our model calculates cell volumes based on experimental parameters measured for strain B/r. The media conditions used for fast, intermediate, and slow growth in Wallden et al. (M9-glucose + amino acids, M9-succinate + amino acids, and M9-acetate, respectively) also do not fully match the conditions we used in our model (M9-glucose + amino acids, M9-glucose,

M9-glucose anaerobic). Full details of the analysis required to generate this figure, as well as a pointer to the generating code, can be found in Section 1.2.

Figure S3

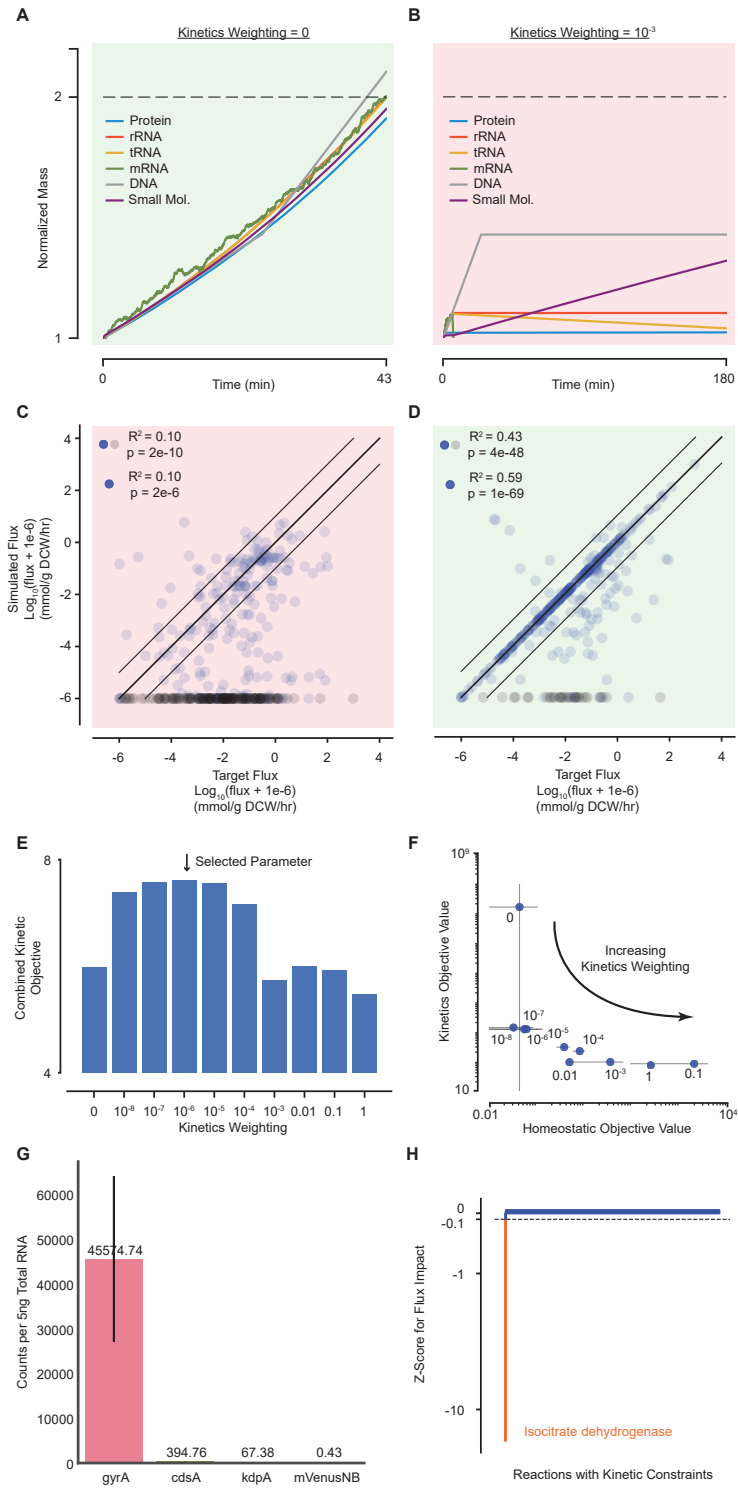

**Fig. S3. Analysis of the tradeoff across different kinetics weighting parameters.** (A and B) Representative output from simulations showing the increase in mass (normalized to initial mass and over a single life cycle) of six key cellular mass fractions for kinetics weighting of 0 (no kinetics objective) in (A) and for kinetics weighting of  $10^{-3}$  (highly weighted kinetic objective) in (B). Output with kinetics weighting of  $10^{-6}$  (selected parameter) is shown in Fig. 3I. The green background indicates desired behavior (balanced growth) similar to results for the selected parameter (Fig. 3I), while the red background indicates undesired behavior (lack of growth). (C and D) Comparison between the metabolic fluxes calculated directly from the kinetic parameters (target) and the fluxes computed by simulations with the new set of disabled constraints, as summarized by the  $R^2$  value. Gray points correspond to reactions with no simulated flux despite having a target flux. Correlations are shown for all data points (blue and gray) and with gray points excluded (blue only). Correlation for kinetics weighting of 0 (no kinetics objective) is shown in (C), for kinetics weighting of  $10^{-3}$  (highly weighted kinetic objective) in (D) and for kinetics weighting of  $10^{-6}$  (selected parameter) in Fig. 3J. The green background indicates desired behavior (few simulated reactions with 0 flux) similar to results for the selected parameter (Fig. 3J), while the red background indicates undesired behavior (high number of simulated reactions with 0 flux). (E) Objective function used to select the kinetics weighting parameter for all weights tested. It combines desired performance measures into one value to maximize. (F) Tradeoff between the average kinetics objective value and the average homeostatic objective value at different kinetics weightings. Points are labeled with their kinetics weighting. (G) Average counts from qPCR for selected RNA showing that *cdsA* is present. *mVenusNB* is not present in the cell and is used to determine the lower limit of detection. (H) Impact of individually disabling each kinetic reaction constraint on the isocitrate dehydrogenase flux in simulations, shown as a z-score representing the average change in flux for removing one constraint compared to the distribution of the average change in flux for re-

moving each constraint. Only disabling the constraint for isocitrate dehydrogenase results in a z-score of  $<-0.1$ . This is a similar analysis as in Fig. 3D but with the impact on isocitrate dehydrogenase flux instead of succinate dehydrogenase flux. Full details of the analysis required to generate this figure, as well as a pointer to the generating code, can be found in Section 1.2.

Figure S4

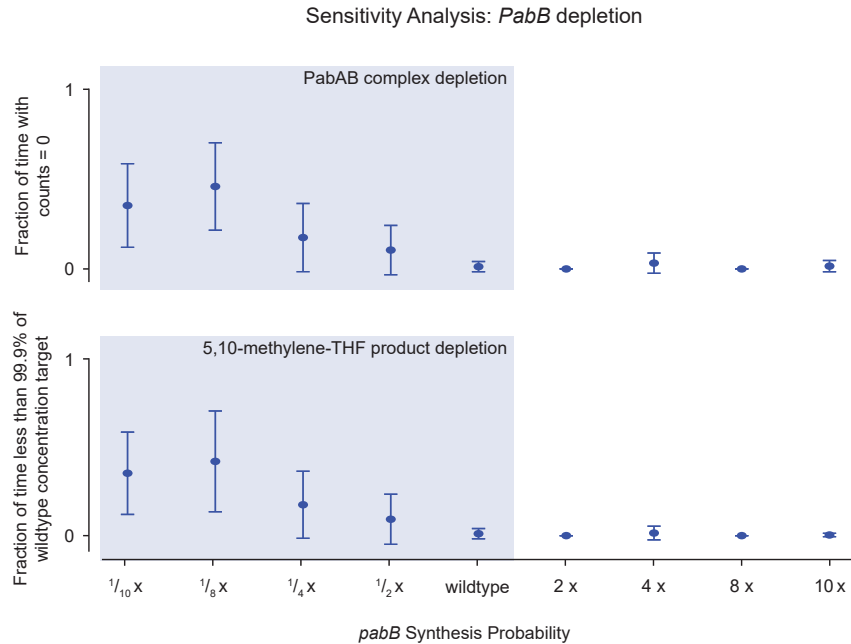

**Fig. S4. PabB sensitivity analysis.** Sensitivity analysis of the *pabB* transcript synthesis probability was performed by a parameter sweep spanning an order of magnitude above and below the wild-type value. Each of the 9 factors tested (shown along the x-axis) was assessed by 16-generation long serial simulations starting from 8 initial cells ( $n = 128$ ). Average fraction of time with zero counts of PabAB enzyme complex, and average fraction of time with 5,10-methylene-THF below 99.9% of the wild-type target concentration are shown with error bars representing their standard deviations. Shaded regions represent PabAB and 5,10-methylene-THF depletion. Full details of the analysis required to generate this figure, as well as a pointer to the generating code, can be found in Section 1.2.

Figure S5

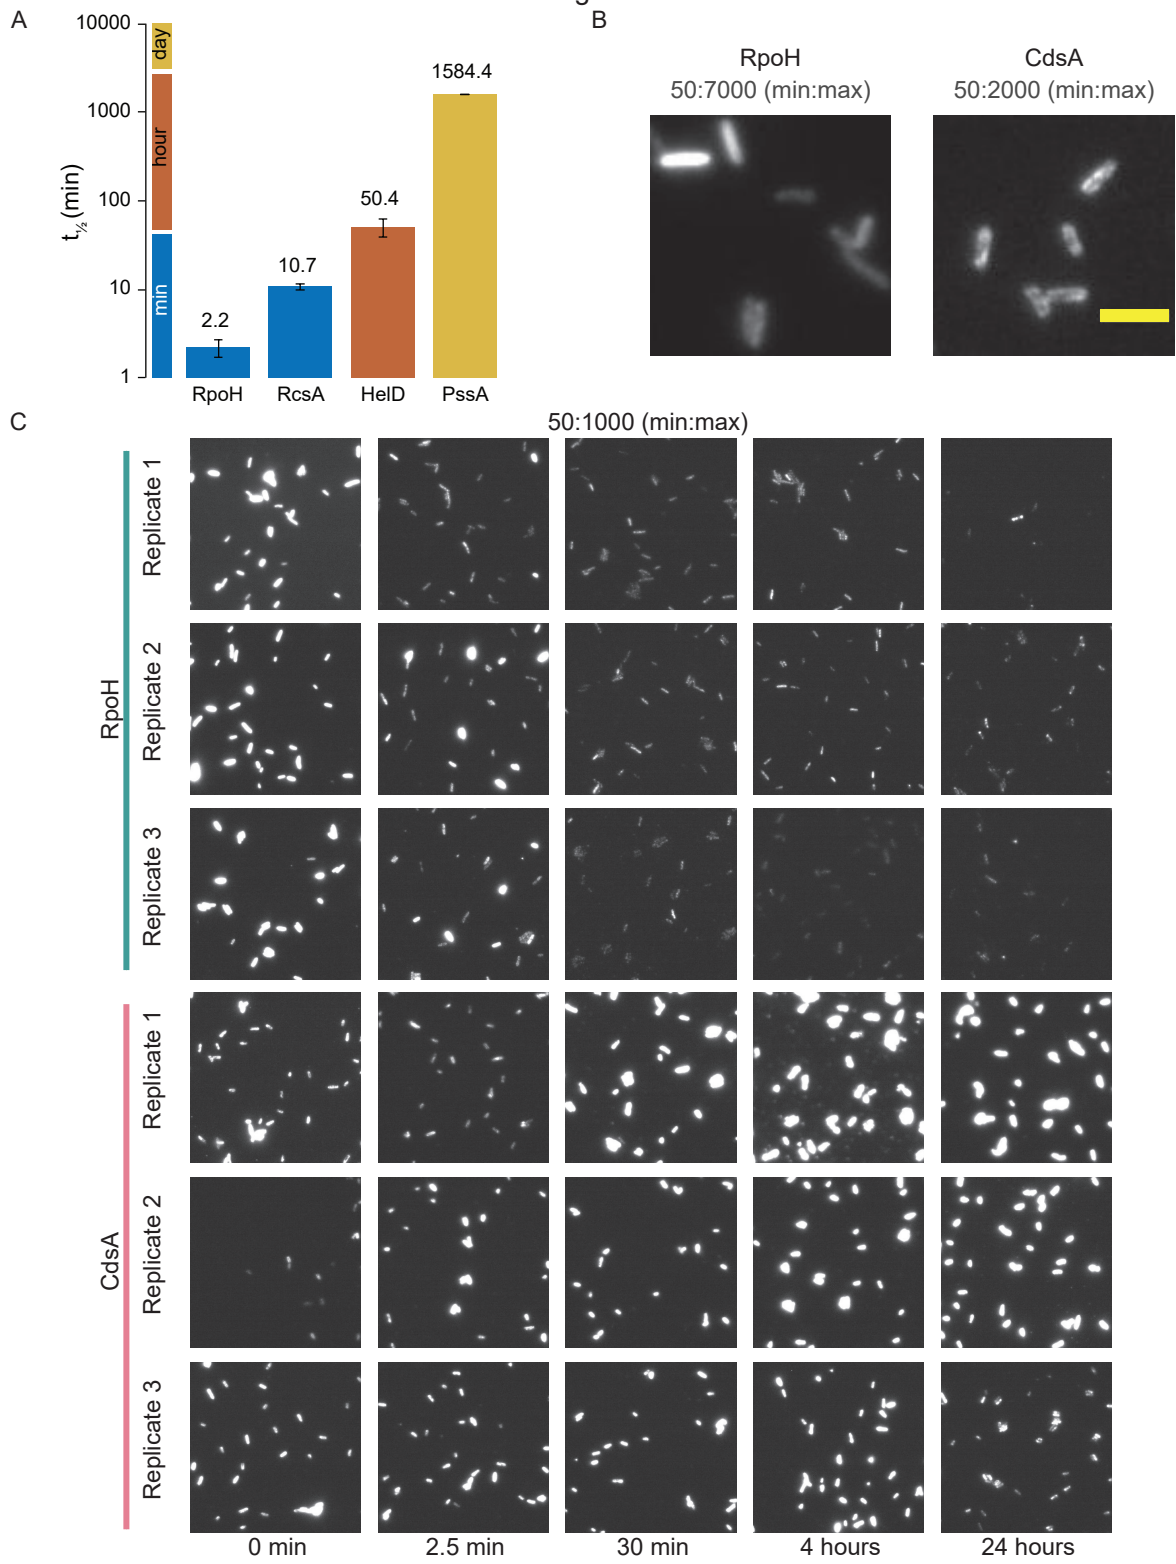



D

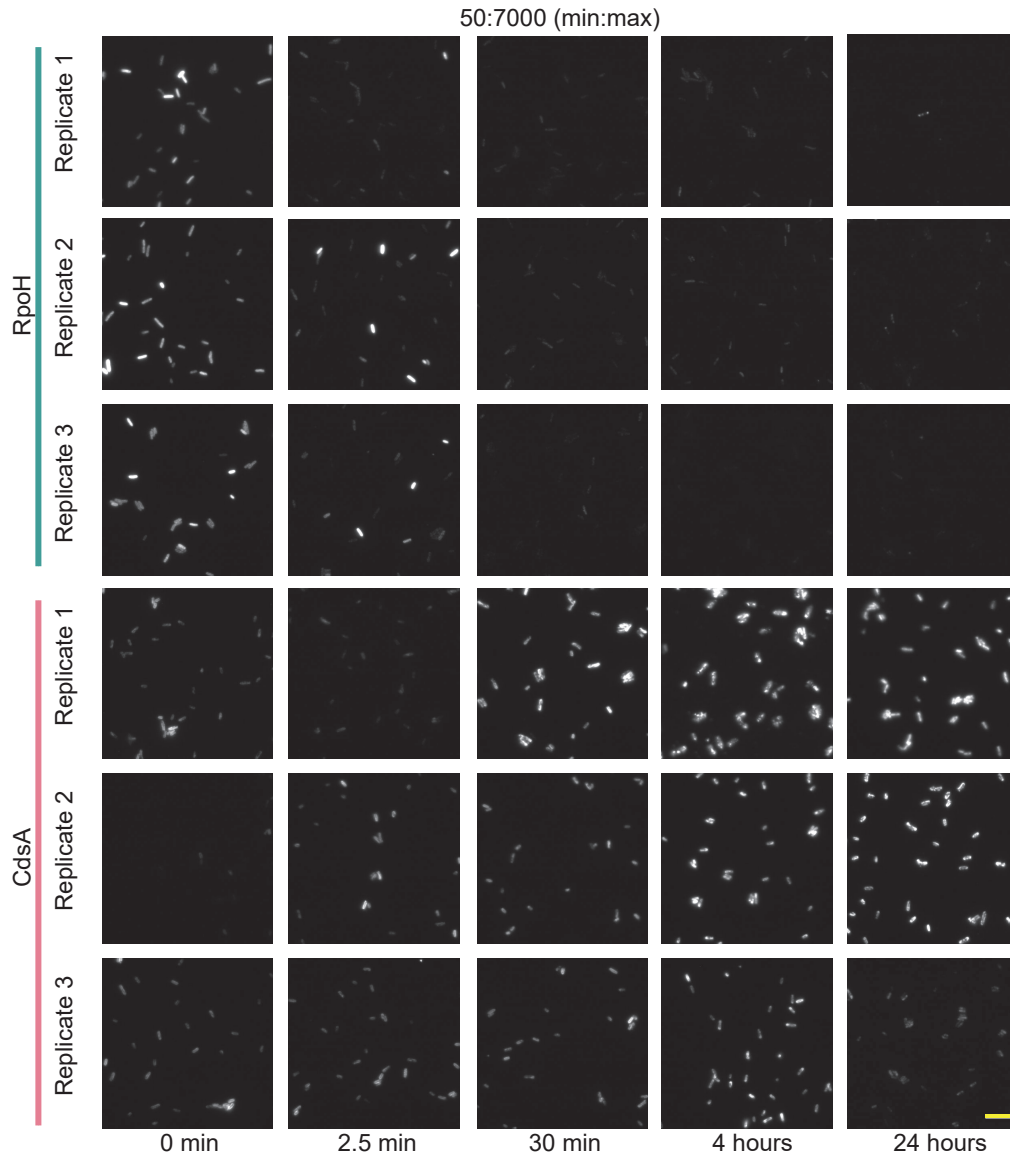

**Fig. S5. Additional data for protein half life determination** (A) We tested four protein half-lives beyond the seven shown in Fig. 5 as controls. First, the half-lives of RpoH and RcsA had previously been reported (42, 43) as on the order of minutes, and were also confirmed as such in our measurements. Second, the N-end rules suggests that the half-lives of HelD and PssA should be on the order of hours, and the balance between protein production and loss for these two proteins is shown to be almost perfect in Fig. 5A. We measured half-lives for these proteins to confirm the longer half-lives. (B) Images of RpoH and CdsA prior to addition of tetracycline show cytoplasmic and membrane staining, respectively. Scale bar (yellow) = 5  $\mu\text{m}$ . (C and D) His-tagged RpoH (green panels) or CdsA (pink panels) expression was induced for 1 hour using IPTG followed by the addition of tetracycline to inhibit translation. At the indicated timepoints, aliquots of the culture were harvested, immunofluorescence was carried out using an anti-His antibody, and samples were imaged. Duplicates of the images are shown scaled between (C) 50-1000 AU and (D) 50-7000 AU. His-RpoH protein signal decreased within minutes, while His-CdsA protein signal was maintained or increased over the timecourse. Three independent replicates are shown for each protein. Scale bar (yellow) = 10  $\mu\text{m}$ .

### 3 Supplemental Tables

**Table S1. Estimate of the number of parameters in the model, grouped by category.** We are often asked how many parameters are contained our models. Estimating this as a simple number belies the complex and heterogeneous nature of the model, where each sub-model is specified using a different mathematical formalism. At one extreme, every piece of data could be considered a parameter (e.g., every single nucleotide in the chromosome sequence), but we feel this isn't a helpful estimate. Likewise, the stoichiometric coefficients in the metabolic network, molecular masses of each mRNA and protein species, as well as all of the data in our RNA expression databases, could all be treated as parameters—but we don't take them into account when answering this question. While one could therefore count parameters in many different ways, Table S1 provides the breakdown for the over nineteen thousand parameters that we state in the main text.

| Description                                                   | Parameter count |
|---------------------------------------------------------------|-----------------|
| RNA Polymerase recruitment strengths (basal and TF-modulated) | 4996            |
| EndoRNase-RNA affinities (govern decay rate of each RNA)      | 4558            |
| Translation efficiencies                                      | 4353            |
| Protein half-lives                                            | 4353            |
| Metabolic reaction constraints                                | 616             |
| Metabolite pools (basal condition)                            | 140             |
| External exchange flux bounds (basal condition)               | 54              |
| Dissociation constants (e.g., for ligand-TF binding)          | 28              |
| Reaction rates for two-component systems                      | 21              |
| Total                                                         | 19119           |

**Table S2A. Data sources for parameter investigation in Fig. S2A.** Data sources for the parameters identified and investigated in Figures S2A and S2B. The values reported in the “Original Data Source” column are swapped for the values reported in the “Validation Data Source” column only for the purpose of the analysis depicted in Fig. S2A. The values reported in the “Original Data Source” column were used in the model for the remainder of this study, including the iterative parameter estimation approach described in Fig. S2B. The parameter number (first column) corresponds to the orange numbering in Figures S2A and S2B.

| Parameter Number | Parameter Name                 | Original Data Source (used in This Study) | Validation Data Source       |
|------------------|--------------------------------|-------------------------------------------|------------------------------|
| 1                | RNA Mass per Cell              | Bremer & Dennis 1996 (31)                 | Pang & Winkler 1994 (44)     |
| 2                | mRNA Mass Fraction             | Neidhardt et al. 1990 (27)                | Kennel 1968 (45)             |
| 3                | mRNA Expression                | This Study                                | Covert et al. 2004 (46)      |
| 4                | Translation Efficiency         | Li et al. 2014 (10)                       | Mohammad et al. 2019 (47)    |
| 5                | R-Protein Half Lives           | Tobias et al. 1991 (12)                   | Computationally Investigated |
| 6                | Protein Mass Fraction          | Bremer & Dennis 1996 (31)                 | Beck et al. 2018 (48)        |
| 7                | RNA Polymerase Elongation Rate | Bremer & Dennis 1996 (31)                 | Computationally Investigated |
| 8                | RNA Polymerase Active Fraction | Bremer & Dennis 1996 (31)                 | Computationally Investigated |
| 9                | mRNA Half Lives                | Bernstein et al. 2002 (8)                 | Moffitt et al. 2016 (49)     |
| 10               | Ribosome Elongation Rate       | Bremer & Dennis 1996 (31)                 | Pedersen 1984 (50)           |
| 11               | Ribosome Active Fraction       | Bremer & Dennis 1996 (31)                 | Dai et al. 2016 (51)         |

**Table S2B. The fold-changes in transcription initiation probabilities for all genes, following the described parameter estimation procedure for both RNA polymerase and ribosome expression, under the glucose-minimal growth condition.** The changes reported in this table are the only changes between the “Original” and “New” columns in Fig. 2E. See Section 1.2.2 for a description of how these parameters were determined. This table is also included in the GitHub repository: [wcEcoli/paper/synthesis\\_probability\\_fold\\_change.tsv](https://github.com/wcEcoli/paper/synthesis_probability_fold_change.tsv).

| Cell component    | Gene(s)     | Fold change | Cell component    | Gene(s)                 | Fold change |
|-------------------|-------------|-------------|-------------------|-------------------------|-------------|
| ribosomal protein | <i>rplY</i> | 0.890       | ribosomal protein | <i>rplC</i>             | 1.489       |
| ribosomal protein | <i>rpmA</i> | 0.890       | ribosomal protein | <i>rplU</i>             | 1.505       |
| ribosomal protein | <i>rpmF</i> | 0.890       | ribosomal protein | <i>rpsD</i>             | 1.549       |
| ribosomal protein | <i>rpmI</i> | 0.890       | ribosomal protein | <i>rpsL</i>             | 1.567       |
| ribosomal protein | <i>rpsF</i> | 0.890       | ribosomal protein | <i>rpsQ</i>             | 1.666       |
| ribosomal protein | <i>rpsR</i> | 0.890       | ribosomal protein | <i>rplS</i>             | 1.689       |
| ribosomal protein | <i>rpsU</i> | 0.890       | ribosomal protein | <i>rplK</i>             | 1.699       |
| ribosomal protein | <i>rpsN</i> | 0.925       | ribosomal protein | <i>sra</i>              | 1.732       |
| ribosomal protein | <i>rpmB</i> | 0.930       | ribosomal protein | <i>rpsK</i>             | 1.782       |
| ribosomal protein | <i>rpsJ</i> | 0.943       | ribosomal protein | <i>rpsC</i>             | 1.857       |
| ribosomal protein | <i>rpsO</i> | 0.965       | ribosomal protein | <i>rplE</i>             | 1.913       |
| ribosomal protein | <i>rpmC</i> | 0.990       | ribosomal protein | <i>rplI</i>             | 1.986       |
| ribosomal protein | <i>rpsT</i> | 0.996       | ribosomal protein | <i>rplF</i>             | 2.136       |
| ribosomal protein | <i>rpsB</i> | 1.026       | ribosomal protein | <i>rplD</i>             | 2.155       |
| ribosomal protein | <i>rpmE</i> | 1.040       | ribosomal protein | <i>rplB</i>             | 2.160       |
| ribosomal protein | <i>rpmG</i> | 1.083       | ribosomal protein | <i>rpsM</i>             | 2.270       |
| ribosomal protein | <i>rplJ</i> | 1.155       | ribosomal protein | <i>rpmH</i>             | 2.272       |
| ribosomal protein | <i>rplP</i> | 1.174       | ribosomal protein | <i>rplO</i>             | 2.480       |
| ribosomal protein | <i>rplT</i> | 1.185       | ribosomal protein | <i>rpsE</i>             | 3.010       |
| ribosomal protein | <i>rpsP</i> | 1.221       | ribosomal protein | <i>rplN</i>             | 3.017       |
| ribosomal protein | <i>rplQ</i> | 1.230       | ribosomal protein | <i>rplR</i>             | 3.018       |
| ribosomal protein | <i>rpsA</i> | 1.244       | ribosomal protein | <i>rpsH</i>             | 3.317       |
| ribosomal protein | <i>rpsI</i> | 1.249       | ribosomal protein | <i>rplX</i>             | 3.347       |
| ribosomal protein | <i>rplW</i> | 1.269       | ribosomal protein | <i>rpmD</i>             | 3.525       |
| ribosomal protein | <i>rplA</i> | 1.298       | RNA polymerase    | <i>rpoA</i>             | 1.806       |
| ribosomal protein | <i>rpmJ</i> | 1.319       | RNA polymerase    | <i>rpoB</i>             | 2.123       |
| ribosomal protein | <i>rpsG</i> | 1.334       | RNA polymerase    | <i>rpoC</i>             | 2.186       |
| ribosomal protein | <i>rplL</i> | 1.357       | rRNA              | <i>rrfA, rrlA, rrsA</i> | 0.984       |
| ribosomal protein | <i>rplV</i> | 1.394       | tRNA              | <i>86 genes</i>         | 0.984       |
| ribosomal protein | <i>rplM</i> | 1.403       | Misc.             | <i>4230 genes</i>       | 0.890       |
| ribosomal protein | <i>rpsS</i> | 1.420       |                   |                         |             |

**Table S3. Parameters that were modified from their initial values as part of the model fitting process.** Two types of manual adjustments were made for certain model parameters. The first was discussed in the main text and is indicated as “Kinetic reaction  $k_{cat}$  and  $K_M$ ” in the adjustments column. The reason for these adjustments is either “Unknown regulation”, which refers to complex regulatory control of the enzymes that is not fully understood, or “Flux validation”, which refers to our observation that the parameter values related to these reactions forced a non-physiological glucose uptake rate and some reaction fluxes that were inconsistent with a validation dataset. Secondly, we do not examine the anaerobic condition in great detail in the main text, but two additional reactions were found (similar to *cdsA*, described in the main text) to impact simulations negatively due to low expression in anaerobic simulations. For the enzymes catalyzing these reactions, the adjustments column refers to the parameter adjustments that were made where “RNA expression” refers to a factor of 10 increase, “Translation efficiency” refers to a factor of 5 increase, and “Protein degradation rate” refers to a tenfold decrease. These enzymes are indicated by “Metabolite production” in the reason column.

| Gene                               | Gene Name                                               | Adjustments                                                          | Reason                |
|------------------------------------|---------------------------------------------------------|----------------------------------------------------------------------|-----------------------|
| <i>ghrB</i>                        | Glyoxylate reductase                                    | Kinetic reaction $k_{cat}$                                           | Unknown regulation    |
| <i>icd</i>                         | Isocitrate dehydrogenase                                | Kinetic reaction $k_{cat}$ and $K_M$                                 | Unknown regulation    |
| <i>gor</i>                         | Glutathione reductase                                   | Kinetic reaction $k_{cat}$                                           | Flux validation       |
| <i>ppa</i>                         | Inorganic pyrophosphatase                               | Kinetic reaction $k_{cat}$ and $K_M$                                 | Flux validation       |
| <i>nuoABCEF</i><br><i>GHIJKLMN</i> | NADH:quinone<br>oxidoreductase                          | Kinetic reaction $k_{cat}$ and $K_M$                                 | Flux validation       |
| <i>sdhABCD</i>                     | Succinate:quinone<br>oxidoreductase                     | Kinetic reaction $k_{cat}$ and $K_M$                                 | Flux validation       |
| <i>yibQ</i>                        | Polysaccharide deacetylase<br>domain-containing protein | RNA expression<br>Translation efficiency<br>Protein degradation rate | Metabolite production |
| <i>atoB</i>                        | Acetyl-CoA acetyltransferase                            | RNA expression<br>Translation efficiency                             | Metabolite production |

**Table S4. List of protein products of essential genes that experience a period in which the corresponding protein is absent due to sub-generational gene expression, as indicated in Fig. 4E.** Protein products of essential genes with a count of zero at least once during the 32 generation simulation of log-phase growth under aerobic glucose minimal media conditions. Shown below are the 23 protein products of 23 essential genes that fall into this category.

| Gene | Description                                                       | Protein product(s) whose counts were zero at least once |
|------|-------------------------------------------------------------------|---------------------------------------------------------|
| lpxB | lipid A disaccharide synthase                                     | CPLX0-7415[i]                                           |
| metR | DNA-binding transcriptional dual regulator MetR                   | CPLX0-7759[c]                                           |
| mraY | phospho-N-acetylmuramoyl-pentapeptide-transferase                 | PHOSNACMURPENTATRANS-MONOMER[i]                         |
| pabA | aminodeoxychorismate synthase subunit 2                           | PABSYNMULTI-CPLX[c]<br>PABASYN-CPLX[c]                  |
| pabB | aminodeoxychorismate synthase subunit 1                           | PABSYNMULTI-CPLX[c]<br>PABASYN-CPLX[c]                  |
| pyrE | orotate phosphoribosyltransferase                                 | OROPRIBTRANS-CPLX[c]                                    |
| tnaB | tryptophan:H <sup>+</sup> symporter TnaB                          | TNAB-MONOMER[i]                                         |
| tsaD | N <sup>6</sup> -L-threonylcarbamoyladenine synthase, TsaD subunit | CPLX0-8181[c]                                           |
| ydfB | Qin prophage; uncharacterized protein YdfB                        | EG11301-MONOMER[c]                                      |
| wzyE | putative enterobacterial common antigen polymerase                | CPLX0-3976[i]                                           |
| yibJ | putative RHS domain-containing protein YibJ                       | EG11766-MONOMER[c]                                      |
| alsK | D-allose kinase                                                   | EG11956-MONOMER[c]                                      |
| mukF | MukF dimer                                                        | CPLX0-7697[c]<br>CPLX0-7698[c]                          |
| yhhQ | putative queuosine precursor transporter                          | EG12217-MONOMER[i]                                      |
| bcsB | cellulose synthase periplasmic subunit                            | CPLX0-8125[i]                                           |
| yafF | putative uncharacterized protein YafF                             | MONOMER0-2653[c]                                        |
| ydiL | DUF1870 domain-containing protein YdiL                            | G6915-MONOMER[c]                                        |
| tsaB | N <sup>6</sup> -L-threonylcarbamoyladenine synthase, TsaB subunit | CPLX0-8181[c]                                           |
| yqgD | DUF2684 domain-containing protein YqgD                            | G7523-MONOMER[c]                                        |
| mqsA | DNA-binding transcriptional repressor MqsA                        | CPLX0-7822[c]                                           |
| tdcF | predicted enamine/imine deaminase                                 | CPLX0-7987[c]                                           |
| yhbV | ubiquinone biosynthesis protein UbiV                              | G7653-MONOMER[c]                                        |
| lptF | lipopolysaccharide transport system protein LptF                  | ABC-53-CPLX[i]                                          |

**Table S5. Experimental details of the half-life measurements.**  $t_{1/2}$  is the expected half-life prior to the experiment. We had two sets of control proteins for which the half-life was determined: (\*) proteins with known and relatively short half-lives (42, 43), used as a control for our experimental technique; and (\*\*) proteins in which the protein production and loss rates predicted by the model are nearly equal (see Fig. 5A), and which therefore are likely to have a 10 hour half-life, also used as a control. The test proteins are also listed, with (\*\*\*) denoting the short half-life proteins as predicted by the N-end rule. <sup>1</sup>IPTG concentration used to over-express protein levels. <sup>2</sup>Amount of protein loaded for protein detection. <sup>3</sup>Antibody dilution in anti-His, anti-RNAP. <sup>4</sup>The time points highlighted in bold were used to calculate the decay constant.

| Gene | ASKA ID | $t_{1/2}$    | Ind. <sup>1</sup> (h) | Protein <sup>2</sup> ( $\mu$ g) | Ab. dilution <sup>3</sup> | Time points <sup>4</sup>      |
|------|---------|--------------|-----------------------|---------------------------------|---------------------------|-------------------------------|
| RcsA | JW1935  | 2-5 min (c*) | 2                     | 10                              | 1:100, 1:200              | <b>0, 2, 5, 10, 30</b> min    |
| RpoH | JW3426  | 2-5 min (c*) | 2                     | 10                              | 1:100, 1:200              | <b>0, 5, 10, 20,</b> 40 min   |
| PssA | JW2569  | 10 h (c**)   | 2                     | 1                               | 1:100, 1:50               | <b>0, 7, 18</b> h             |
| HelD | JW0945  | 10 h (c**)   | 2                     | 4                               | 1:100, 1:100              | <b>0, 1,</b> 3, 4, 7, 23 h    |
| CarA | JW0030  | 2 min (***)  | 2                     | 2                               | 1:100, 1:100              | <b>0, 0.17, 1, 4, 18</b> h    |
| GshA | JW2663  | 2 min (***)  | 1                     | 1                               | 1:100, 1:100              | <b>0, 0.17, 1, 4, 18</b> h    |
| Pnp  | JW5851  | 2 min (***)  | 1                     | 4                               | 1:100, 1:100              | <b>0, 18, 24, 48</b> h        |
| DcuR | JW4085  | 10 h         | 2                     | 2                               | 1:100, 1:100              | <b>0, 0.5, 2.5,</b> 5.5, 18 h |
| BioD | JW0761  | 10 h         | 2                     | 4                               | 1:100, 1:100              | <b>0, 0.67, 2,</b> 4, 18 h    |
| Rph  | JW3618  | 10 h         | 2                     | 4                               | 1:100, 1:100              | <b>0, 0.5, 2.5,</b> 5.5, 18 h |



**Table S6. Genes that are functionally incorporated in the model and their model related**

**function.** All other genes are transcribed and translated but play no further role in the model.

The table is also included in the GitHub repository: [wcEcoli/paper/functional\\_genes.tsv](https://github.com/wcEcoli/paper/functional_genes.tsv).

| Gene | Function   | Gene | Function                 | Gene | Function                 |
|------|------------|------|--------------------------|------|--------------------------|
| aas  | Metabolism | aqpZ | Metabolism               | astB | Metabolism               |
| aat  | Metabolism | araA | Metabolism               | astC | Metabolism               |
| accA | Metabolism | araB | Metabolism               | astD | Metabolism               |
| accC | Metabolism | araC | Transcription Regulation | astE | Metabolism               |
| accD | Metabolism | araD | Metabolism               | atoA | Metabolism               |
| aceE | Metabolism | araE | Metabolism               | atoB | Metabolism               |
| aceF | Metabolism | araF | Metabolism               | atoD | Metabolism               |
| ackA | Metabolism | araG | Metabolism               | atpA | Metabolism               |
| acnA | Metabolism | araH | Metabolism               | atpB | Metabolism               |
| acnB | Metabolism | arcA | Transcription Regulation | atpC | Metabolism               |
| acpH | Metabolism | argA | Metabolism               | atpD | Metabolism               |
| acpS | Metabolism | argB | Metabolism               | atpE | Metabolism               |
| acpT | Metabolism | argC | Metabolism               | atpF | Metabolism               |
| acrA | Metabolism | argD | Metabolism               | atpG | Metabolism               |
| acrB | Metabolism | argE | Metabolism               | atpH | Metabolism               |
| acs  | Metabolism | argF | Metabolism               | avtA | Metabolism               |
| add  | Metabolism | argG | Metabolism               | azoR | Metabolism               |
| ade  | Metabolism | argH | Metabolism               | baeR | Transcription Regulation |
| adhE | Metabolism | argI | Metabolism               | basR | Transcription Regulation |
| adhP | Metabolism | argP | Transcription Regulation | betA | Metabolism               |
| adiA | Metabolism | argR | Transcription Regulation | betB | Metabolism               |
| adk  | Metabolism | argS | Metabolism               | betT | Metabolism               |
| ahr  | Metabolism | argT | Metabolism               | bglF | Metabolism               |
| aidB | Metabolism | arnA | Metabolism               | bglJ | Transcription Regulation |
| alaA | Metabolism | arnB | Metabolism               | bioA | Metabolism               |
| alaC | Metabolism | aroA | Metabolism               | bioB | Metabolism               |
| alaE | Metabolism | aroB | Metabolism               | bioC | Metabolism               |
| alaS | Metabolism | aroC | Metabolism               | bioD | Metabolism               |
| aldA | Metabolism | aroD | Metabolism               | bioF | Metabolism               |
| aldB | Metabolism | aroE | Metabolism               | bioH | Metabolism               |
| allB | Metabolism | aroF | Metabolism               | birA | Metabolism               |
| allC | Metabolism | aroG | Metabolism               | bisC | Metabolism               |
| allE | Metabolism | aroH | Metabolism               | brnQ | Metabolism               |
| alr  | Metabolism | aroK | Metabolism               | btuE | Metabolism               |
| alsA | Metabolism | aroL | Metabolism               | cadA | Metabolism               |
| alsB | Metabolism | aroP | Metabolism               | cadB | Metabolism               |
| alsC | Metabolism | arsB | Metabolism               | can  | Metabolism               |
| alsE | Metabolism | arsC | Metabolism               | carA | Metabolism               |
| alsK | Metabolism | artJ | Metabolism               | carB | Metabolism               |
| amn  | Metabolism | artM | Metabolism               | cdd  | Metabolism               |
| amtB | Metabolism | artP | Metabolism               | cdh  | Metabolism               |
| ansA | Metabolism | artQ | Metabolism               | cdsA | Metabolism               |
| ansB | Metabolism | asd  | Metabolism               | chaA | Metabolism               |
| ansP | Metabolism | asnA | Metabolism               | cheR | Metabolism               |
| apaH | Metabolism | asnB | Metabolism               | citC | Metabolism               |
| aphA | Metabolism | asnS | Metabolism               | clcA | Metabolism               |
| appA | Metabolism | aspA | Metabolism               | clsA | Metabolism               |
| appB | Metabolism | aspC | Metabolism               | clsB | Metabolism               |
| appC | Metabolism | aspS | Metabolism               | clsC | Metabolism               |
| apt  | Metabolism | astA | Metabolism               | cmk  | Metabolism               |

Table S6 continued.

| Gene | Function                 | Gene | Function                 | Gene | Function                 |
|------|--------------------------|------|--------------------------|------|--------------------------|
| coaA | Metabolism               | dcyD | Metabolism               | exuT | Metabolism               |
| coaD | Metabolism               | ddlA | Metabolism               | fabA | Metabolism               |
| coaE | Metabolism               | ddlB | Metabolism               | fabB | Metabolism               |
| codA | Metabolism               | ddpX | Metabolism               | fabD | Metabolism               |
| cof  | Metabolism               | def  | Metabolism               | fabF | Metabolism               |
| copA | Metabolism               | deoA | Metabolism               | fabG | Metabolism               |
| corA | Metabolism               | deoB | Metabolism               | fabH | Metabolism               |
| cpdA | Metabolism               | deoC | Metabolism               | fabI | Metabolism               |
| cpsB | Metabolism               | deoD | Metabolism               | fabZ | Metabolism               |
| cpsG | Metabolism               | dfp  | Metabolism               | fadA | Metabolism               |
| crr  | Metabolism               | dgkA | Metabolism               | fadB | Metabolism               |
| csdA | Metabolism               | dgoA | Metabolism               | fadD | Metabolism               |
| cueO | Metabolism               | dgt  | Metabolism               | fadE | Metabolism               |
| cyaA | Metabolism               | dhaK | Metabolism               | fadI | Metabolism               |
| cycA | Metabolism               | dhaL | Metabolism               | fadJ | Metabolism               |
| cydA | Metabolism               | dhaM | Metabolism               | fadK | Metabolism               |
| cydB | Metabolism               | dkgA | Metabolism               | fadL | Metabolism               |
| cydC | Metabolism               | dkgB | Metabolism               | fadM | Metabolism               |
| cydD | Metabolism               | dld  | Metabolism               | fau  | Metabolism               |
| cynT | Metabolism               | dmlA | Metabolism               | fbaA | Metabolism               |
| cyoA | Metabolism               | dmsA | Metabolism               | fbaB | Metabolism               |
| cyoB | Metabolism               | dmsB | Metabolism               | fbp  | Metabolism               |
| cyoC | Metabolism               | dmsC | Metabolism               | fdhF | Metabolism               |
| cyoD | Metabolism               | dnaA | Transcription Regulation | fdnG | Metabolism               |
| cyoE | Metabolism               | dppA | Metabolism               | fdnH | Metabolism               |
| cysA | Metabolism               | dppB | Metabolism               | fdnI | Metabolism               |
| cysC | Metabolism               | dppC | Metabolism               | fdoG | Metabolism               |
| cysD | Metabolism               | dppD | Metabolism               | fdoH | Metabolism               |
| cysE | Metabolism               | dppF | Metabolism               | fdoI | Metabolism               |
| cysG | Metabolism               | dsdA | Metabolism               | feaB | Metabolism               |
| cysH | Metabolism               | dtpB | Metabolism               | feoB | Metabolism               |
| cysI | Metabolism               | dtpD | Metabolism               | fes  | Metabolism               |
| cysJ | Metabolism               | dut  | Metabolism               | fieF | Metabolism               |
| cysK | Metabolism               | dxr  | Metabolism               | fis  | Transcription Regulation |
| cysM | Metabolism               | dxs  | Metabolism               | fkIB | Metabolism               |
| cysN | Metabolism               | eamA | Metabolism               | fkpA | Metabolism               |
| cysP | Metabolism               | eamB | Metabolism               | fkpB | Metabolism               |
| cysQ | Metabolism               | eda  | Metabolism               | fliY | Metabolism               |
| cysS | Metabolism               | edd  | Metabolism               | fmt  | Metabolism               |
| cysU | Metabolism               | efeB | Metabolism               | fnr  | Transcription Regulation |
| cysW | Metabolism               | emrE | Metabolism               | focA | Metabolism               |
| cytR | Transcription Regulation | emtA | Metabolism               | folA | Metabolism               |
| dadA | Metabolism               | eno  | Metabolism               | folB | Metabolism               |
| dadX | Metabolism               | entA | Metabolism               | folC | Metabolism               |
| dapA | Metabolism               | entC | Metabolism               | folD | Metabolism               |
| dapB | Metabolism               | entD | Metabolism               | folE | Metabolism               |
| dapD | Metabolism               | entE | Metabolism               | folK | Metabolism               |
| dapE | Metabolism               | epd  | Metabolism               | folM | Metabolism               |
| dapF | Metabolism               | epmB | Metabolism               | folP | Metabolism               |
| dauA | Metabolism               | eptB | Metabolism               | folX | Metabolism               |
| dcd  | Metabolism               | etk  | Metabolism               | fpr  | Metabolism               |
| dctA | Metabolism               | etp  | Metabolism               | frc  | Metabolism               |
| dcuA | Metabolism               | eutB | Metabolism               | frdA | Metabolism               |
| dcuB | Metabolism               | eutC | Metabolism               | frdB | Metabolism               |
| dcuR | Transcription Regulation | eutD | Metabolism               | frdC | Metabolism               |

Table S6 continued.

| Gene | Function   | Gene | Function   | Gene   | Function                 |
|------|------------|------|------------|--------|--------------------------|
| frdD | Metabolism | glnS | Metabolism | hemD   | Metabolism               |
| fre  | Metabolism | gloA | Metabolism | hemE   | Metabolism               |
| friB | Metabolism | gloB | Metabolism | hemF   | Metabolism               |
| friC | Metabolism | glpA | Metabolism | hemG   | Metabolism               |
| friD | Metabolism | glpB | Metabolism | hemL   | Metabolism               |
| frmA | Metabolism | glpC | Metabolism | hemN   | Metabolism               |
| frmB | Metabolism | glpD | Metabolism | hisA   | Metabolism               |
| ftsW | Metabolism | glpE | Metabolism | hisB   | Metabolism               |
| fucA | Metabolism | glpF | Metabolism | hisC   | Metabolism               |
| fucI | Metabolism | glpK | Metabolism | hisD   | Metabolism               |
| fucK | Metabolism | glpQ | Metabolism | hisF   | Metabolism               |
| fucO | Metabolism | glpX | Metabolism | hisG   | Metabolism               |
| fucP | Metabolism | gltA | Metabolism | hisH   | Metabolism               |
| fucU | Metabolism | gltB | Metabolism | hisI   | Metabolism               |
| fumA | Metabolism | gltD | Metabolism | hisJ   | Metabolism               |
| fumB | Metabolism | gltI | Metabolism | hisM   | Metabolism               |
| fumC | Metabolism | gltJ | Metabolism | hisP   | Metabolism               |
| gabD | Metabolism | gltK | Metabolism | hisQ   | Metabolism               |
| gabP | Metabolism | gltL | Metabolism | hisS   | Metabolism               |
| gabT | Metabolism | gltP | Metabolism | hns    | Transcription Regulation |
| gadA | Metabolism | gltX | Metabolism | hpt    | Metabolism               |
| gadB | Metabolism | glxK | Metabolism | hycB   | Metabolism               |
| gadC | Metabolism | glxR | Metabolism | hycC   | Metabolism               |
| galE | Metabolism | glyA | Metabolism | hycD   | Metabolism               |
| galK | Metabolism | glyQ | Metabolism | hycE   | Metabolism               |
| galM | Metabolism | glyS | Metabolism | hycF   | Metabolism               |
| galP | Metabolism | gmhB | Metabolism | hycG   | Metabolism               |
| galT | Metabolism | gmk  | Metabolism | hyi    | Metabolism               |
| gapA | Metabolism | gnd  | Metabolism | hypF   | Metabolism               |
| garK | Metabolism | gntK | Metabolism | icd    | Metabolism               |
| garL | Metabolism | gntP | Metabolism | idi    | Metabolism               |
| garR | Metabolism | gor  | Metabolism | idnD   | Metabolism               |
| gatY | Metabolism | gpmA | Metabolism | idnK   | Metabolism               |
| gatZ | Metabolism | gpmM | Metabolism | idnO   | Metabolism               |
| gcl  | Metabolism | gpp  | Metabolism | ihfA   | Transcription Regulation |
| gcvP | Metabolism | gpsA | Metabolism | ihfB   | Transcription Regulation |
| gcvT | Metabolism | gpt  | Metabolism | ileS   | Metabolism               |
| gdhA | Metabolism | gshA | Metabolism | ilvA   | Metabolism               |
| ghrA | Metabolism | gshB | Metabolism | ilvB   | Metabolism               |
| ghrB | Metabolism | gsiA | Metabolism | ilvC   | Metabolism               |
| glcA | Metabolism | gsiB | Metabolism | ilvD   | Metabolism               |
| glcD | Metabolism | gsiC | Metabolism | ilvE   | Metabolism               |
| glcE | Metabolism | gsiD | Metabolism | ilvG_1 | Metabolism               |
| glcF | Metabolism | gsk  | Metabolism | ilvG_2 | Metabolism               |
| gldA | Metabolism | gss  | Metabolism | ilvH   | Metabolism               |
| glf  | Metabolism | guaA | Metabolism | ilvI   | Metabolism               |
| glgC | Metabolism | guaB | Metabolism | ilvM   | Metabolism               |
| glk  | Metabolism | guaC | Metabolism | ilvN   | Metabolism               |
| glmM | Metabolism | guaD | Metabolism | iscS   | Metabolism               |
| glmS | Metabolism | gutQ | Metabolism | ispA   | Metabolism               |
| glmU | Metabolism | hchA | Metabolism | ispB   | Metabolism               |
| glnA | Metabolism | hdhA | Metabolism | ispD   | Metabolism               |
| glnH | Metabolism | hemA | Metabolism | ispE   | Metabolism               |
| glnP | Metabolism | hemB | Metabolism | ispF   | Metabolism               |
| glnQ | Metabolism | hemC | Metabolism | ispG   | Metabolism               |

Table S6 continued.

| Gene | Function                 | Gene | Function                 | Gene | Function                 |
|------|--------------------------|------|--------------------------|------|--------------------------|
| ispH | Metabolism               | lptG | Metabolism               | metA | Metabolism               |
| ispU | Metabolism               | lpxA | Metabolism               | metB | Metabolism               |
| katE | Metabolism               | lpxB | Metabolism               | metC | Metabolism               |
| katG | Metabolism               | lpxC | Metabolism               | metE | Metabolism               |
| kbaY | Metabolism               | lpxD | Metabolism               | metF | Metabolism               |
| kbaZ | Metabolism               | lpxH | Metabolism               | metG | Metabolism               |
| kbl  | Metabolism               | lpxK | Metabolism               | metH | Metabolism               |
| kch  | Metabolism               | lpxL | Metabolism               | metI | Metabolism               |
| kdgK | Metabolism               | lpxM | Metabolism               | metJ | Transcription Regulation |
| kdpA | Metabolism               | lpxP | Metabolism               | metK | Metabolism               |
| kdpB | Metabolism               | lpxT | Metabolism               | metL | Metabolism               |
| kdpC | Metabolism               | lrp  | Transcription Regulation | metN | Metabolism               |
| kdpF | Metabolism               | lsrA | Metabolism               | metQ | Metabolism               |
| kdsA | Metabolism               | lsrB | Metabolism               | mgsA | Metabolism               |
| kdsB | Metabolism               | lsrC | Metabolism               | mgtA | Metabolism               |
| kdsC | Metabolism               | lsrD | Metabolism               | mhpD | Metabolism               |
| kdsD | Metabolism               | lsrF | Metabolism               | mhpE | Metabolism               |
| kduD | Metabolism               | lsrG | Metabolism               | mhpF | Metabolism               |
| kefB | Metabolism               | lsrK | Metabolism               | miaA | Metabolism               |
| kefC | Metabolism               | ltaE | Metabolism               | miaB | Metabolism               |
| kefF | Metabolism               | luxS | Metabolism               | mltA | Metabolism               |
| kup  | Metabolism               | lysA | Metabolism               | mltB | Metabolism               |
| lacA | Metabolism               | lysC | Metabolism               | mltC | Metabolism               |
| lacY | Metabolism               | lysP | Metabolism               | mltD | Metabolism               |
| lacZ | Metabolism               | lysS | Metabolism               | mltF | Metabolism               |
| ldcC | Metabolism               | lysU | Metabolism               | mmuM | Metabolism               |
| ldhA | Metabolism               | lyxK | Metabolism               | mnaT | Metabolism               |
| leuA | Metabolism               | maa  | Metabolism               | mntH | Metabolism               |
| leuB | Metabolism               | maeA | Metabolism               | mntP | Metabolism               |
| leuC | Metabolism               | maeB | Metabolism               | mpaA | Metabolism               |
| leuD | Metabolism               | mak  | Metabolism               | mpl  | Metabolism               |
| leuE | Metabolism               | malP | Metabolism               | mppA | Metabolism               |
| leuO | Transcription Regulation | malQ | Metabolism               | mqq  | Metabolism               |
| leuS | Metabolism               | malY | Metabolism               | mraY | Metabolism               |
| lexA | Transcription Regulation | malZ | Metabolism               | msbA | Metabolism               |
| lhgO | Metabolism               | manA | Metabolism               | msrA | Metabolism               |
| lipA | Metabolism               | manX | Metabolism               | msrB | Metabolism               |
| lipB | Metabolism               | manY | Metabolism               | msrC | Metabolism               |
| livF | Metabolism               | manZ | Metabolism               | mtlD | Metabolism               |
| livG | Metabolism               | mazG | Metabolism               | mtn  | Metabolism               |
| livH | Metabolism               | mdaB | Metabolism               | mtr  | Metabolism               |
| livJ | Metabolism               | mdfA | Metabolism               | murA | Metabolism               |
| livK | Metabolism               | mdh  | Metabolism               | murB | Metabolism               |
| livM | Metabolism               | mdb  | Metabolism               | murC | Metabolism               |
| lldD | Metabolism               | mdtI | Metabolism               | murD | Metabolism               |
| lldP | Metabolism               | mdtJ | Metabolism               | murE | Metabolism               |
| lpcA | Metabolism               | mdtM | Metabolism               | murF | Metabolism               |
| lpd  | Metabolism               | menA | Metabolism               | murG | Metabolism               |
| lplA | Metabolism               | menB | Metabolism               | murI | Metabolism               |
| lptA | Metabolism               | menC | Metabolism               | murJ | Metabolism               |
| lptB | Metabolism               | menD | Metabolism               | murQ | Metabolism               |
| lptC | Metabolism               | menE | Metabolism               | nadA | Metabolism               |
| lptD | Metabolism               | menF | Metabolism               | nadB | Metabolism               |
| lptE | Metabolism               | menH | Metabolism               | nadC | Metabolism               |
| lptF | Metabolism               | menI | Metabolism               | nadD | Metabolism               |

Table S6 continued.

| Gene | Function                 | Gene | Function   | Gene   | Function              |
|------|--------------------------|------|------------|--------|-----------------------|
| nadE | Metabolism               | ompC | Metabolism | phnC   | Metabolism            |
| nadK | Metabolism               | ompF | Metabolism | phnD   | Metabolism            |
| nadR | Metabolism               | oppA | Metabolism | phnE_1 | Metabolism            |
| nagA | Metabolism               | oppB | Metabolism | phnN   | Metabolism            |
| nagD | Metabolism               | oppC | Metabolism | phnO   | Metabolism            |
| nagK | Metabolism               | oppD | Metabolism | phoA   | Metabolism            |
| nanA | Metabolism               | oppF | Metabolism | phoE   | Metabolism            |
| nanC | Metabolism               | orn  | RNA Decay  | pitA   | Metabolism            |
| nanE | Metabolism               | otsA | Metabolism | pitB   | Metabolism            |
| nanK | Metabolism               | otsB | Metabolism | plaP   | Metabolism            |
| nanM | Metabolism               | oxc  | Metabolism | pldB   | Metabolism            |
| nanT | Metabolism               | paaA | Metabolism | plsB   | Metabolism            |
| narK | Metabolism               | paaB | Metabolism | plsC   | Metabolism            |
| narL | Transcription Regulation | paaC | Metabolism | pncA   | Metabolism            |
| ndh  | Metabolism               | paaE | Metabolism | pncB   | Metabolism            |
| ndk  | Metabolism               | paaF | Metabolism | pncC   | Metabolism            |
| nepI | Metabolism               | paaG | Metabolism | pnp    | Metabolism, RNA Decay |
| nhaA | Metabolism               | paaH | Metabolism | pntA   | Metabolism            |
| nhaB | Metabolism               | paaI | Metabolism | pntB   | Metabolism            |
| nhoA | Metabolism               | paaJ | Metabolism | poIA   | RNA Decay             |
| nikA | Metabolism               | paaK | Metabolism | potA   | Metabolism            |
| nikB | Metabolism               | paaZ | Metabolism | potB   | Metabolism            |
| nikC | Metabolism               | pabA | Metabolism | potC   | Metabolism            |
| nikD | Metabolism               | pabB | Metabolism | potD   | Metabolism            |
| nikE | Metabolism               | pabC | Metabolism | potE   | Metabolism            |
| nirB | Metabolism               | panB | Metabolism | potF   | Metabolism            |
| nirC | Metabolism               | panC | Metabolism | potG   | Metabolism            |
| nirD | Metabolism               | panE | Metabolism | potH   | Metabolism            |
| nrdA | Metabolism               | patA | Metabolism | potI   | Metabolism            |
| nrdB | Metabolism               | patD | Metabolism | poxB   | Metabolism            |
| nrdD | Metabolism               | pck  | Metabolism | ppa    | Metabolism            |
| nrdE | Metabolism               | pdxA | Metabolism | ppc    | Metabolism            |
| nrdF | Metabolism               | pdxH | Metabolism | pphA   | Metabolism            |
| nrdG | Metabolism               | pdxJ | Metabolism | pphB   | Metabolism            |
| nudB | Metabolism               | pdxK | Metabolism | ppiA   | Metabolism            |
| nudF | Metabolism               | pdxY | Metabolism | ppiB   | Metabolism            |
| nudI | Metabolism               | pepA | Metabolism | ppiC   | Metabolism            |
| nudJ | Metabolism               | pepB | Metabolism | ppk    | Metabolism            |
| nudK | Metabolism               | pepD | Metabolism | ppsA   | Metabolism            |
| nudL | Metabolism               | pepN | Metabolism | preA   | Metabolism            |
| nuoA | Metabolism               | pfkA | Metabolism | preT   | Metabolism            |
| nuoB | Metabolism               | pfkB | Metabolism | prmC   | Metabolism            |
| nuoC | Metabolism               | pgaB | Metabolism | proA   | Metabolism            |
| nuoE | Metabolism               | pgi  | Metabolism | proB   | Metabolism            |
| nuoF | Metabolism               | pgk  | Metabolism | proC   | Metabolism            |
| nuoG | Metabolism               | pgl  | Metabolism | proP   | Metabolism            |
| nuoH | Metabolism               | pgm  | Metabolism | proS   | Metabolism            |
| nuoI | Metabolism               | pgpA | Metabolism | proV   | Metabolism            |
| nuoJ | Metabolism               | pgpB | Metabolism | proW   | Metabolism            |
| nuoK | Metabolism               | pgpC | Metabolism | proX   | Metabolism            |
| nuoL | Metabolism               | pgsA | Metabolism | prpB   | Metabolism            |
| nuoM | Metabolism               | pheA | Metabolism | prpC   | Metabolism            |
| nuoN | Metabolism               | pheP | Metabolism | prpD   | Metabolism            |
| nupC | Metabolism               | pheS | Metabolism | prpE   | Metabolism            |
| nupG | Metabolism               | pheT | Metabolism | prs    | Metabolism            |

Table S6 continued.

| Gene | Function                             | Gene | Function              | Gene | Function      |
|------|--------------------------------------|------|-----------------------|------|---------------|
| pssA | Metabolism                           | rffG | Metabolism            | rplW | Translation   |
| pstA | Metabolism                           | rffH | Metabolism            | rplX | Translation   |
| pstB | Metabolism                           | rhaA | Metabolism            | rplY | Translation   |
| pstC | Metabolism                           | rhaB | Metabolism            | rpmA | Translation   |
| pstS | Metabolism                           | rhaD | Metabolism            | rpmB | Translation   |
| psuG | Metabolism                           | rhaM | Metabolism            | rpmC | Translation   |
| pta  | Metabolism                           | rhaT | Metabolism            | rpmD | Translation   |
| ptsG | Metabolism                           | rhlB | Metabolism            | rpmE | Translation   |
| purA | Metabolism                           | rhtA | Metabolism            | rpmF | Translation   |
| purB | Metabolism                           | rhtC | Metabolism            | rpmG | Translation   |
| purC | Metabolism                           | ribA | Metabolism            | rpmH | Translation   |
| purD | Metabolism                           | ribB | Metabolism            | rpmI | Translation   |
| purE | Metabolism                           | ribC | Metabolism            | rpmJ | Translation   |
| purF | Metabolism                           | ribD | Metabolism            | rpoA | Transcription |
| purH | Metabolism                           | ribE | Metabolism            | rpoB | Transcription |
| purK | Metabolism                           | ribF | Metabolism            | rpoC | Transcription |
| purL | Metabolism                           | rihA | Metabolism            | rpsA | Translation   |
| purM | Metabolism                           | rihB | Metabolism            | rpsB | Translation   |
| purN | Metabolism                           | rihC | Metabolism            | rpsC | Translation   |
| purT | Metabolism                           | rna  | RNA Decay             | rpsD | Translation   |
| purU | Metabolism                           | rnb  | RNA Decay             | rpsE | Translation   |
| putA | Transcription Regulation, Metabolism | rnc  | RNA Decay             | rpsF | Translation   |
| putP | Metabolism                           | rnd  | RNA Decay             | rpsG | Translation   |
| puuA | Metabolism                           | rne  | Metabolism, RNA Decay | rpsH | Translation   |
| puuB | Metabolism                           | rng  | RNA Decay             | rpsI | Translation   |
| puuC | Metabolism                           | rnhA | RNA Decay             | rpsJ | Translation   |
| puuD | Metabolism                           | rnhB | RNA Decay             | rpsK | Translation   |
| puuE | Metabolism                           | rnlA | RNA Decay             | rpsL | Translation   |
| puuP | Metabolism                           | rmpA | RNA Decay             | rpsM | Translation   |
| pykA | Metabolism                           | rnr  | RNA Decay             | rpsN | Translation   |
| pykF | Metabolism                           | rnt  | RNA Decay             | rpsO | Translation   |
| pyrB | Metabolism                           | rpe  | Metabolism            | rpsP | Translation   |
| pyrC | Metabolism                           | rph  | RNA Decay             | rpsQ | Translation   |
| pyrD | Metabolism                           | rpiA | Metabolism            | rpsR | Translation   |
| pyrE | Metabolism                           | rpiB | Metabolism            | rpsS | Translation   |
| pyrF | Metabolism                           | rplA | Translation           | rpsT | Translation   |
| pyrG | Metabolism                           | rplB | Translation           | rpsU | Translation   |
| pyrH | Metabolism                           | rplC | Translation           | rrrD | Metabolism    |
| pyrI | Metabolism                           | rplD | Translation           | rsmI | Metabolism    |
| qor  | Metabolism                           | rplE | Translation           | rutG | Metabolism    |
| rbn  | RNA Decay                            | rplF | Translation           | sad  | Metabolism    |
| rbsD | Metabolism                           | rplI | Translation           | sbmA | Metabolism    |
| rcnA | Metabolism                           | rplJ | Translation           | sbp  | Metabolism    |
| rbsB | Transcription Regulation             | rplK | Translation           | scpA | Metabolism    |
| rdgB | Metabolism                           | rplL | Translation           | scpB | Metabolism    |
| rdoA | Metabolism                           | rplM | Translation           | scpC | Metabolism    |
| relA | Metabolism                           | rplN | Translation           | sdaA | Metabolism    |
| rfaD | Metabolism                           | rplO | Translation           | sdaB | Metabolism    |
| rfaE | Metabolism                           | rplP | Translation           | sdaC | Metabolism    |
| rfaB | Metabolism                           | rplQ | Translation           | sdhA | Metabolism    |
| rfaB | Metabolism                           | rplR | Translation           | sdhB | Metabolism    |
| rfaC | Metabolism                           | rplS | Translation           | sdhC | Metabolism    |
| rfaD | Metabolism                           | rplT | Translation           | sdhD | Metabolism    |
| rffA | Metabolism                           | rplU | Translation           | serA | Metabolism    |
| rffE | Metabolism                           | rplV | Translation           | serB | Metabolism    |

Table S6 continued.

| Gene | Function    | Gene | Function                 | Gene | Function   |
|------|-------------|------|--------------------------|------|------------|
| serC | Metabolism  | thrS | Metabolism               | ulaE | Metabolism |
| serS | Metabolism  | thyA | Metabolism               | ulaF | Metabolism |
| setA | Metabolism  | tig  | Metabolism               | upp  | Metabolism |
| setB | Metabolism  | tilS | Metabolism               | uraA | Metabolism |
| sgbE | Metabolism  | tktA | Metabolism               | ushA | Metabolism |
| sgbH | Metabolism  | tktB | Metabolism               | uxaA | Metabolism |
| sgbU | Metabolism  | tmk  | Metabolism               | uxaB | Metabolism |
| slt  | Metabolism  | tnaA | Metabolism               | uxaC | Metabolism |
| slyD | Metabolism  | tnaB | Metabolism               | uxuA | Metabolism |
| sodC | Metabolism  | tolB | Metabolism               | uxuB | Metabolism |
| speB | Metabolism  | tolC | Metabolism               | valS | Metabolism |
| speC | Metabolism  | tpiA | Metabolism               | visC | Metabolism |
| speE | Metabolism  | tppB | Metabolism               | waaA | Metabolism |
| speF | Metabolism  | tqsA | Metabolism               | waaB | Metabolism |
| speG | Metabolism  | treC | Metabolism               | waaC | Metabolism |
| spoT | Metabolism  | treF | Metabolism               | waaF | Metabolism |
| spr  | Metabolism  | trkG | Metabolism               | waaG | Metabolism |
| sra  | Translation | trkH | Metabolism               | waaI | Metabolism |
| srlD | Metabolism  | trmD | Metabolism               | waaJ | Metabolism |
| sstT | Metabolism  | trpA | Metabolism               | waaP | Metabolism |
| ssuA | Metabolism  | trpB | Metabolism               | waaQ | Metabolism |
| ssuB | Metabolism  | trpC | Metabolism               | waaU | Metabolism |
| ssuC | Metabolism  | trpD | Metabolism               | waaY | Metabolism |
| ssuD | Metabolism  | trpE | Metabolism               | waaZ | Metabolism |
| ssuE | Metabolism  | trpR | Transcription Regulation | wbbI | Metabolism |
| sthA | Metabolism  | trpS | Metabolism               | wcaJ | Metabolism |
| sucA | Metabolism  | truB | Metabolism               | wrbA | Metabolism |
| sucB | Metabolism  | truC | Metabolism               | wza  | Metabolism |
| sucC | Metabolism  | truD | Metabolism               | wzb  | Metabolism |
| sucD | Metabolism  | trxB | Metabolism               | wzc  | Metabolism |
| sufS | Metabolism  | tsx  | Metabolism               | xanP | Metabolism |
| surA | Metabolism  | ttdA | Metabolism               | xanQ | Metabolism |
| surE | Metabolism  | ttdB | Metabolism               | xapA | Metabolism |
| tadA | Metabolism  | tyrA | Metabolism               | xapB | Metabolism |
| talA | Metabolism  | tyrB | Metabolism               | xdhA | Metabolism |
| talB | Metabolism  | tyrP | Metabolism               | xdhB | Metabolism |
| tedA | Metabolism  | tyrR | Transcription Regulation | xdhC | Metabolism |
| tdcB | Metabolism  | tyrS | Metabolism               | xyIA | Metabolism |
| tdcC | Metabolism  | uacT | Metabolism               | xyIB | Metabolism |
| tdcD | Metabolism  | ubiA | Metabolism               | xyIE | Metabolism |
| tdcG | Metabolism  | ubiC | Metabolism               | xyIF | Metabolism |
| tdh  | Metabolism  | ubiD | Metabolism               | xyIG | Metabolism |
| tdk  | Metabolism  | ubiE | Metabolism               | xyIH | Metabolism |
| tesA | Metabolism  | ubiF | Metabolism               | yaaH | Metabolism |
| thiC | Metabolism  | ubiG | Metabolism               | yagE | Metabolism |
| thiD | Metabolism  | ubiH | Metabolism               | yagF | Metabolism |
| thiE | Metabolism  | udk  | Metabolism               | yahK | Metabolism |
| thiF | Metabolism  | udp  | Metabolism               | ybaS | Metabolism |
| thiG | Metabolism  | ugd  | Metabolism               | ybbO | Metabolism |
| thiH | Metabolism  | ugpA | Metabolism               | ybcF | Metabolism |
| thiI | Metabolism  | ugpB | Metabolism               | ybdL | Metabolism |
| thiL | Metabolism  | ugpC | Metabolism               | ybgT | Metabolism |
| thrA | Metabolism  | ugpE | Metabolism               | ybhA | Metabolism |
| thrB | Metabolism  | ugpQ | Metabolism               | ybiV | Metabolism |
| thrC | Metabolism  | ulaD | Metabolism               | ybjE | Metabolism |

Table S6 continued.

| Gene | Function   |
|------|------------|
| ybjG | Metabolism |
| ybjI | Metabolism |
| ycaO | Metabolism |
| ycbL | Metabolism |
| ycjG | Metabolism |
| ycjU | Metabolism |
| ydbK | Metabolism |
| yddG | Metabolism |
| ydeA | Metabolism |
| ydfG | Metabolism |
| ydiB | Metabolism |
| ydiF | Metabolism |
| ydiO | Metabolism |
| ydjG | Metabolism |
| yeaE | Metabolism |
| yeaG | Metabolism |
| yecC | Metabolism |
| yecS | Metabolism |
| yegS | Metabolism |
| yeiG | Metabolism |
| yejA | Metabolism |
| yejB | Metabolism |
| yejE | Metabolism |
| yejF | Metabolism |
| yfaU | Metabolism |

| Gene | Function   |
|------|------------|
| yfaW | Metabolism |
| yfbR | Metabolism |
| yfbT | Metabolism |
| yfdE | Metabolism |
| yfdR | Metabolism |
| yfeX | Metabolism |
| ygaH | Metabolism |
| ygaZ | Metabolism |
| ygfQ | Metabolism |
| yggF | Metabolism |
| yghA | Metabolism |
| yghZ | Metabolism |
| ygiF | Metabolism |
| yhbO | Metabolism |
| yhdE | Metabolism |
| yhdH | Metabolism |
| yiaK | Metabolism |
| yiaY | Metabolism |
| yibQ | Metabolism |
| yidA | Metabolism |
| yieF | Metabolism |
| yigB | Metabolism |
| yigL | Metabolism |
| yihS | Metabolism |
| yihU | Metabolism |

| Gene | Function   |
|------|------------|
| yihV | Metabolism |
| yihX | Metabolism |
| yijE | Metabolism |
| yjbB | Metabolism |
| yjcD | Metabolism |
| yjdL | Metabolism |
| yjeF | Metabolism |
| yjeH | Metabolism |
| yjhG | Metabolism |
| yjhH | Metabolism |
| yjjG | Metabolism |
| yjjX | Metabolism |
| yliI | Metabolism |
| yneH | Metabolism |
| yqhD | Metabolism |
| yrfG | Metabolism |
| ytfG | Metabolism |
| zitB | Metabolism |
| zntA | Metabolism |
| znuA | Metabolism |
| znuB | Metabolism |
| znuC | Metabolism |
| zupT | Metabolism |
| zwf  | Metabolism |



**Table S7. Metabolites that are included in the homeostatic objective in the model.** Initial concentration targets come from two sources: source 1 (mass spec data (17)) or source 2 (cellular biomass from the FBA model (15) combined with growth dependent mass fractions (31) and average mass fractions (52)). The table is also included in the GitHub repository: [wcEcoli/paper/metabolite\\_pools.tsv](https://github.com/wcEcoli/paper/metabolite_pools.tsv).

| Metabolite               | Source | Metabolite                     | Source |
|--------------------------|--------|--------------------------------|--------|
| 2-3-DIHYDROXYBENZOATE[c] | 1      | DEOXYADENOSINE[c]              | 1      |
| 2-KETOGLUTARATE[c]       | 1      | DEOXYGUANOSINE[c]              | 1      |
| 4-hydroxybenzoate[c]     | 1      | DGMP[c]                        | 1      |
| ACETOACETYL-COA[c]       | 1      | DGTP[c]                        | 2      |
| ACETYL-COA[c]            | 1      | DI-H-OROTATE[c]                | 1      |
| ACETYL-P[c]              | 1      | DIHYDROXY-ACETONE-PHOSPHATE[c] | 1      |
| ADENINE[c]               | 1      | ENTEROBACTIN[c]                | 2      |
| ADENOSINE[c]             | 1      | FAD[c]                         | 1      |
| ADP-D-GLUCOSE[c]         | 1      | FE+2[c]                        | 2      |
| ADP[c]                   | 1      | FE+2[p]                        | 2      |
| AMP[c]                   | 1      | FRUCTOSE-16-DIPHOSPHATE[c]     | 1      |
| ANTHRANILATE[c]          | 1      | FUM[c]                         | 1      |
| APS[c]                   | 1      | G3P[c]                         | 1      |
| ARG[c]                   | 1      | GDP[c]                         | 1      |
| ASN[c]                   | 1      | GLC-D-LACTONE[c]               | 1      |
| ATP[c]                   | 1      | GLN[c]                         | 1      |
| BIOTIN[c]                | 2      | GLT[c]                         | 1      |
| CA+2[c]                  | 2      | GLUCONATE[c]                   | 1      |
| CA+2[p]                  | 2      | GLUTATHIONE[c]                 | 1      |
| CARBAMYUL-L-ASPARTATE[c] | 1      | GLYCERATE[c]                   | 1      |
| CHORISMATE[c]            | 2      | GLYCEROL-3P[c]                 | 1      |
| CIS-ACONITATE[c]         | 1      | GLY[c]                         | 2      |
| CIT[c]                   | 1      | GMP[c]                         | 1      |
| CL-[c]                   | 2      | GTP[c]                         | 1      |
| CMP[c]                   | 1      | GUANINE[c]                     | 1      |
| CO+2[c]                  | 2      | GUANOSINE[c]                   | 1      |
| CO+2[p]                  | 2      | HISTIDINOL[c]                  | 1      |
| CO-A[c]                  | 1      | HIS[c]                         | 1      |
| CPD-12115[c]             | 2      | HOMO-CYS[c]                    | 1      |
| CPD-12261[p]             | 2      | ILE[c]                         | 2      |
| CPD-12575[c]             | 1      | K+[c]                          | 2      |
| CPD-12819[c]             | 2      | L-ALPHA-ALANINE[c]             | 1      |
| CPD-12824[c]             | 2      | L-ASPARTATE[c]                 | 1      |
| CPD-13469[c]             | 1      | L-CITRULLINE[c]                | 1      |
| CPD-2961[c]              | 1      | L-ORNITHINE[c]                 | 1      |
| CPD-8260[c]              | 2      | L-SELENOCYSTEINE[c]            | 2      |
| CPD-9956[c]              | 2      | LEU[c]                         | 2      |
| CPD0-939[c]              | 2      | LYS[c]                         | 1      |
| CTP[c]                   | 1      | MALONYL-COA[c]                 | 1      |
| CYS[c]                   | 2      | MAL[c]                         | 1      |
| CYTIDINE[c]              | 1      | METHYLENE-THF[c]               | 2      |
| CYTOSINE[c]              | 1      | MET[c]                         | 1      |
| DAMP[c]                  | 1      | MG+2[c]                        | 2      |
| DATP[c]                  | 1      | MN+2[c]                        | 2      |
| DCTP[c]                  | 1      | MN+2[p]                        | 2      |

Table S7 continued.

| Metabolite                    | Source |
|-------------------------------|--------|
| N-ACETYL-D-GLUCOSAMINE-1-P[c] | 1      |
| N-ALPHA-ACETYLORNITHINE[c]    | 1      |
| NADH[c]                       | 1      |
| NADPH[c]                      | 1      |
| NADP[c]                       | 1      |
| NAD[c]                        | 1      |
| NI+2[c]                       | 2      |
| NI+2[p]                       | 2      |
| OXYGEN-MOLECULE[p]            | 2      |
| PHENYL-PYRUVATE[c]            | 1      |
| PHE[c]                        | 1      |
| PHOSPHO-ENOL-PYRUVATE[c]      | 1      |
| PI[c]                         | 2      |
| PI[p]                         | 2      |
| PPI[c]                        | 2      |
| PROPIONYL-COA[c]              | 1      |
| PROTOHEME[c]                  | 2      |
| PROTON[c]                     | 2      |
| PRO[c]                        | 1      |
| PUTRESCINE[c]                 | 2      |
| PYRIDOXAL-PHOSPHATE[c]        | 2      |
| QUINOLINATE[c]                | 1      |
| REDUCED-MENAQUINONE[c]        | 2      |
| RIBOFLAVIN[c]                 | 1      |
| S-ADENOSYLMETHIONINE[c]       | 1      |

| Metabolite                    | Source |
|-------------------------------|--------|
| SER[c]                        | 1      |
| SHIKIMATE[c]                  | 1      |
| SIROHEME[c]                   | 2      |
| SPERMIDINE[c]                 | 2      |
| SUC-COA[c]                    | 1      |
| SUC[c]                        | 1      |
| TDP[c]                        | 1      |
| THF[c]                        | 2      |
| THIAMINE-PYROPHOSPHATE[c]     | 2      |
| THR[c]                        | 1      |
| TRP[c]                        | 1      |
| TTP[c]                        | 1      |
| TYR[c]                        | 1      |
| UDP-GLUCURONATE[c]            | 1      |
| UDP-N-ACETYL-D-GLUCOSAMINE[c] | 1      |
| UDP[c]                        | 1      |
| UMP[c]                        | 2      |
| UNDECAPRENYL-DIPHOSPHATE[c]   | 2      |
| URIDINE[c]                    | 1      |
| UTP[c]                        | 1      |
| VAL[c]                        | 1      |
| WATER[c]                      | 2      |
| ZN+2[c]                       | 2      |
| ZN+2[p]                       | 2      |
| glycogen-monomer[c]           | 2      |

**Table S8. Kinetic constraints curated for the model** Pubmed ID shows original data reference. Reaction ID is the model ID for the reaction.  $k_{cat}$  and  $K_M$  show the curated values with Adjusted  $k_{cat}$  showing the temperature adjusted  $k_{cat}$  (at 37 ° C). Enzyme and Substrates are the model IDs. Substrates for  $K_M$  correspond to each listed  $K_M$  value. Temp is the temperature that measurements were made at. Excluded indicates if the constraint is excluded from the final model ("True" means that the constraint was excluded). The table is also included in the GitHub repository: [wcEcoli/paper/kinetic\\_constraints.tsv](https://github.com/wcEcoli/paper/kinetic_constraints.tsv).

| Pubmed ID | Reaction ID                                                                          | $k_{cat}$<br>(1/s) | $K_M$<br>(uM) | Adjusted<br>$k_{cat}$<br>(1/s) | Enzyme                              | Substrates                                 | Substrates for $K_M$         | Temp<br>(C) | Excluded |
|-----------|--------------------------------------------------------------------------------------|--------------------|---------------|--------------------------------|-------------------------------------|--------------------------------------------|------------------------------|-------------|----------|
| 11237876  | 1.1.1.215-RXN                                                                        | 40.7               | []            | 93.5                           | CPLX0-235[i]                        | ['CPD-377[c]']                             | []                           | 25          | False    |
| 10225425  | 1.1.1.262-RXN                                                                        | 1.4                | []            | 1.4                            | CPLX0-7847[c]                       | ['4-PHOSPHONOOXY-THREONINE[c]']            | []                           | 37          | False    |
| 17557829  | 1.1.1.39-RXN                                                                         | 82.7               | [660, 68.8]   | 134.3                          | MALIC-NAD-CPLX[c]                   | ['MAL[c]', 'NAD[c]']                       | ['MAL[c]', 'NAD[c]']         | 30          | False    |
| 25160617  | 1.1.1.83-RXN                                                                         | 11.7               | [94]          | 26.88                          | G6986-MONOMER[c]                    | ['CPD-660[c]', 'NAD[c]']                   | ['NAD[c]']                   | 25          | False    |
| 11604533  | 1.8.4.13-RXN-MET/Ox-Thioredoxin/WATER//CPD-8989/Red-Thioredoxin.51...EG11433-MONOMER | 3.7                | []            | 8.5                            | EG11433-MONOMER[c]                  | ['CPD-8989[c]', 'Thioredoxin[c]']          | 'Red- []                     | 25          | False    |
| 15680231  | 1.8.4.14-RXN-MET/Ox-Thioredoxin/WATER//CPD-8990/Red-Thioredoxin.51...EG12394-MONOMER | 1.1                | []            | 2.527                          | EG12394-MONOMER[c]                  | ['Red-Thioredoxin[c]']                     | []                           | 25          | False    |
| 17535911  | 1.8.4.14-RXN-MET/Ox-Thioredoxin/WATER//CPD-8990/Red-Thioredoxin.51...G7005-MONOMER   | 6.9                | []            | 15.85                          | G7005-MONOMER[c]                    | ['CPD-8990[c]', 'Thioredoxin[c]']          | 'Red- []                     |             | False    |
| 11724562  | 2-DEHYDROPANTOATE-REDUCT-RXN_2-DEHYDROPANTOATE-REDUCT-MONOMER                        | 40                 | [20]          | 40                             | 2-DEHYDROPANTOATE-REDUCT-MONOMER[c] | ['2-DEHYDROPANTOATE[c]', 'NADPH[c]']       | ['NADPH[c]']                 | 37          | False    |
| 15654896  | 2-DEHYDROPANTOATE-REDUCT-RXN_CPLX0-7643                                              | 0.194              | []            | 0.194                          | CPLX0-7643[c]                       | ['2-DEHYDROPANTOATE[c]']                   | []                           | 37          | False    |
| 9492273   | 2-OXOPENT-4-ENOATE-HYDRATASE-RXN                                                     | 450                | []            | 1034                           | CPLX0-7951[c]                       | ['OXOPENTENOATE[c]']                       | []                           | 25          | False    |
| 11084021  | 2.3.1.157-RXN                                                                        | 1350               | []            | 1350                           | NAG1P-URIDYLTRANS-CPLX[c]           | ['ACETYL-COA[c]']                          | []                           | 37          | False    |
| 18567546  | 2.5.1.19-RXN                                                                         | 26.4               | [100]         | 60.65                          | AROAM-MONOMER[c]                    | ['PHOSPHO-ENOL-PYRUVATE[c]']               | ['PHOSPHO-ENOL-PYRUVATE[c]'] | 25          | False    |
| 21928762  | 2.5.1.64-RXN                                                                         | 0.28               | [9.9]         | 0.6433                         | CPLX0-7525[c]                       | ['2-KETOGLUTARATE[c]']                     | ['2-KETOGLUTARATE[c]']       | 25          | False    |
| 15379557  | 2.7.7.60-RXN                                                                         | 48.4               | []            | 127.7                          | CPLX0-234[c]                        | ['2-C-METHYL-D-ERYTHRITOL-4-PHOSPHATE[c]'] | []                           | 23          | False    |

|          |                                                                                        |       |        |        |                                |                                                          |                            |    |       |
|----------|----------------------------------------------------------------------------------------|-------|--------|--------|--------------------------------|----------------------------------------------------------|----------------------------|----|-------|
| 11686925 | 2.8.1.6-RXN                                                                            | 13.89 | []     | 13.89  | BIOTIN-SYN-CPLX[c]             | ['DETHIOBIOTIN[c]']                                      | []                         | 37 | False |
| 2514789  | 3-DEHYDROQUINATE-SYNTHASE-RXN                                                          | 150   | []     | 487.4  | AROB-MONOMER[c]                | ['3-DEOXY-D-ARABINO-HEPTULOSONATE-7-P[c]']               | []                         | 20 | False |
| 9003442  | 3-ISOPROPYLMALDEHYDROG-RXN_3-ISOPROPYLMALDEHYDROG-CPLX                                 | 69    | [321]  | 56.05  | 3-ISOPROPYLMALDEHYDROG-CPLX[c] | ['2-D-THREO-HYDROXY-3-CARBOXY-ISOCAPROATE[c]', 'NAD[c]'] | ['NAD[c]']                 | 40 | False |
| 25160617 | 3-ISOPROPYLMALDEHYDROG-RXN_G6986-MONOMER                                               | 0.102 | [70]   | 0.2343 | G6986-MONOMER[c]               | ['2-D-THREO-HYDROXY-3-CARBOXY-ISOCAPROATE[c]', 'NAD[c]'] | ['NAD[c]']                 | 25 | False |
| 16990279 | 3.1.3.74-RXN[CCO-CYTOSOL]-PYRIDOXAL_PHOSPHATE/WATER//PYRIDOXAL/Pi.53...EG11239-MONOMER | 1     | [370]  | 2.297  | EG11239-MONOMER[c]             | ['PYRIDOXAL_PHOSPHATE[c]']                               | ['PYRIDOXAL_PHOSPHATE[c]'] |    | False |
| 16990279 | 3.1.3.74-RXN[CCO-CYTOSOL]-PYRIDOXAL_PHOSPHATE/WATER//PYRIDOXAL/Pi.53...EG11470-MONOMER | 12    | [1500] | 27.57  | EG11470-MONOMER[c]             | ['PYRIDOXAL_PHOSPHATE[c]']                               | ['PYRIDOXAL_PHOSPHATE[c]'] |    | False |
| 16990279 | 3.1.3.74-RXN[CCO-CYTOSOL]-PYRIDOXAL_PHOSPHATE/WATER//PYRIDOXAL/Pi.53...G6246-MONOMER   | 0.58  | [680]  | 1.332  | G6246-MONOMER[c]               | ['PYRIDOXAL_PHOSPHATE[c]']                               | ['PYRIDOXAL_PHOSPHATE[c]'] |    | False |
| 9610360  | 3.5.1.88-RXN                                                                           | 2100  | []     | 3411   | EG11440-MONOMER[c]             | ['FORMYL-L-METHIONYL-PEPTIDE[c]']                        | []                         | 30 | False |
| 2986688  | 3.6.1.41-RXN                                                                           | 250   | []     | 250    | EG10048-MONOMER[c]             | ['ADENOSYL-P4[c]']                                       | []                         | 37 | False |
| 17616624 | 325-BISPHOSPHATE-NUCLEOTIDASE-RXN                                                      | 11.4  | []     | 11.4   | EG10043-MONOMER[c]             | ['3-5-ADP[c]']                                           | []                         | 37 | False |
| 15489502 | 5-NUCLEOTID-RXN[CCO-CYTOSOL]-AMP/WATER//ADENOSINE/Pi.37...EG11817-MONOMER              | 4.9   | [320]  | 4.9    | EG11817-MONOMER[c]             | ['AMP[c]']                                               | ['AMP[c]']                 | 37 | False |
| 16990279 | 5-NUCLEOTID-RXN[CCO-CYTOSOL]-AMP/WATER//ADENOSINE/Pi.37...EG12115-MONOMER              | 1.3   | [1800] | 2.987  | EG12115-MONOMER[c]             | ['AMP[c]']                                               | ['AMP[c]']                 |    | False |
| 15489502 | 5-NUCLEOTID-RXN[CCO-CYTOSOL]-GMP/WATER//GUANOSINE/Pi.37...EG11817-MONOMER              | 11    | [260]  | 11     | EG11817-MONOMER[c]             | ['GMP[c]']                                               | ['GMP[c]']                 | 37 | False |
| 15489502 | 5-NUCLEOTID-RXN[CCO-CYTOSOL]-UMP/WATER//URIDINE/Pi.35...EG12115-MONOMER                | 34.2  | [660]  | 34.2   | EG12115-MONOMER[c]             | ['UMP[c]']                                               | ['UMP[c]']                 | 37 | False |
| 10231382 | 5.4.2.10-RXN-GLUCOSAMINE-1P//CPD-13469.26.                                             | 7.9   | []     | 7.9    | PHOSGLUCOSAMINEMUT-MONOMER[c]  | ['GLUCOSAMINE-1P[c]']                                    | []                         | 37 | False |

|                                                                                                                                                                           |                                          |       |              |        |                                    |                                        |                                                    |    |       |
|---------------------------------------------------------------------------------------------------------------------------------------------------------------------------|------------------------------------------|-------|--------------|--------|------------------------------------|----------------------------------------|----------------------------------------------------|----|-------|
| Kruger, N.J.<br>Effects of temperature on the kinetic properties of phosphofruktokinase from Escherichia coli Biochem. Soc. Trans. 17 760-761 1989 Escherichia coli ; 0 0 | 6PFRUCTPHOS-RXN_6PFK-1-CPX               | 185   | []           | 185    | 6PFK-1-CPX[c]                      | ['FRUCTOSE-6P[c]']                     | []                                                 | 37 | False |
| 20887711                                                                                                                                                                  | 6PFRUCTPHOS-RXN_6PFK-2-CPX               | 62    | [12]         | 142.4  | 6PFK-2-CPX[c]                      | ['FRUCTOSE-6P[c]', 'ATP[c]']           | ['ATP[c]']                                         |    | False |
| 2007545                                                                                                                                                                   | 7-ALPHA-HYDROXYSTEROID-DEH-RXN (reverse) | 3798  | []           | 3798   | 7-ALPHA-HYDROXYSTEROID-DEH-CPLX[c] | ['CHOLATE[c]']                         | []                                                 | 37 | False |
| 23237860                                                                                                                                                                  | ACETALD-DEHYDROG-RXN_MHPF-MONOMER        | 17.5  | [90000, 250] | 40.2   | MHPF-MONOMER[c]                    | ['ACETALD[c]', 'CO-A[c]', 'NAD[c]']    | ['CO-A[c]', 'NAD[c]']                              | 25 | False |
| 9015391                                                                                                                                                                   | ACETOLACTREDUCTOISOM-RXN (reverse)       | 0.052 | []           | 0.1471 | CPLX0-7643[c]                      | ['NADP[c]']                            | []                                                 | 22 | False |
| 15654896                                                                                                                                                                  | ACETOLACTREDUCTOISOM-RXN                 | 2.231 | [2.53]       | 2.231  | CPLX0-7643[c]                      | ['2-ACETO-LACTATE[c]', 'NADPH[c]']     | ['NADPH[c]']                                       | 37 | False |
| 22443469                                                                                                                                                                  | ACETOLACTSYN-RXN_ACETOLACTSYNI-CPLX      | 71.3  | []           | 71.3   | ACETOLACTSYNI-CPLX[c]              | ['PYRUVATE[c]']                        | []                                                 | 37 | False |
| 9581571                                                                                                                                                                   | ACETOHBUTSYN-RXN_ACETOLACTSYNII-CPLX     | 66.7  | []           | 66.7   | ACETOLACTSYNII-CPLX[c]             | ['PYRUVATE[c]']                        | []                                                 | 37 | False |
| 16201833                                                                                                                                                                  | ACETYLORNDACET-RXN                       | 3800  | [1200]       | 8730   | ACETYLORNDACET-CPLX[c]             | ['N-ALPHA-ACETYLORNITHINE[c]']         | ['N-ALPHA-ACETYLORNITHINE[c]']                     | 25 | False |
| 15967977                                                                                                                                                                  | ACNEULY-RXN (reverse)                    | 10.5  | []           | 24.12  | ACNEULY-CPLX[c]                    | ['N-ACETYLNEURAMINATE[c]']             | []                                                 | 25 | False |
| 16101288                                                                                                                                                                  | ADENOSYLHOMOCYSTEINE-NUCLEOSIDASE-RXN    | 2.6   | []           | 7.354  | CPLX0-1541[c]                      | ['ADENOSYL-HOMO-CYS[c]']               | []                                                 | 22 | False |
| 12937174                                                                                                                                                                  | ADENPHOSPHOR-RXN (reverse)               | 3.32  | [46]         | 7.627  | DEOD-CPLX[c]                       | ['ADENOSINE[c]']                       | ['ADENOSINE[c]']                                   | 25 | False |
| 357906                                                                                                                                                                    | ADENPRIBOSYLTRAN-RXN                     | 9.33  | [20]         | 9.33   | ADENPRIBOSYLTRAN-CPLX[c]           | ['ADENINE[c]', 'PRPP[c]']              | ['ADENINE[c]']                                     | 37 | False |
| 6300054                                                                                                                                                                   | ADENYLATECYC-RXN                         | 1.67  | [1000]       | 1.67   | ADENYLATECYC-MONOMER[c]            | ['ATP[c]']                             | ['ATP[c]', 'ATP[c]', 'ADP[c]', 'GTP[c]', 'PPI[c]'] | 37 | False |
| 16981730                                                                                                                                                                  | ADENYLOSUCCINATE-SYNTHASE-RXN            | 1     | [26, 230]    | 2.828  | ADENYLOSUCCINATE-SYN-DIMER[c]      | ['IMP[c]', 'GTP[c]', 'L-ASPARTATE[c]'] | ['GTP[c]', 'L-ASPARTATE[c]']                       | 22 | False |
| 2549047                                                                                                                                                                   | ADENYLYLSULFKIN-RXN                      | 0.206 | []           | 0.4733 | ADENYLYLSULFKIN-CPLX[c]            | ['ADP[c]']                             | []                                                 | 25 | False |

|          |                                                                                             |      |              |       |                         |                                        |                                            |        |       |
|----------|---------------------------------------------------------------------------------------------|------|--------------|-------|-------------------------|----------------------------------------|--------------------------------------------|--------|-------|
| 2549047  | ADENYLYLSULFKIN-RXN (reverse)                                                               | 50   | []           | 114.9 | ADENYLYLSULFKIN-CPLX[c] | ['APS[c]']                             | []                                         | 25     | False |
| 7918446  | ALANINE-TRNA-LIGASE-RXN-ALA-tRNAs/L-ALPHA-ALANINE/ATP/PROTON//Charged-ALA-tRNAs/AMP/PPI.64. | 84   | [340, 83]    | 84    | ALAS-CPLX[c]            | ['L-ALPHA-ALANINE[c]', 'ATP[c]']       | ['L-ALPHA-ALANINE[c]', 'ATP[c]']           | 37     | True  |
| 15796715 | ALARACECAT-RXN_CPLX0-8202 (reverse)                                                         | 27.6 | [290]        | 27.6  | CPLX0-8202[c]           | ['L-ALPHA-ALANINE[c]']                 | ['L-ALPHA-ALANINE[c]']                     | 37     | False |
| 15796715 | ALARACECAT-RXN_CPLX0-8202                                                                   | 28.3 | []           | 28.3  | CPLX0-8202[c]           | ['D-ALANINE[c]']                       | []                                         | 37     | False |
| 10406936 | ALCOHOL-DEHYDROG-RXN_CPLX0-8015 (reverse)                                                   | 163  | []           | 374.5 | CPLX0-8015[c]           | ['ACETALD[c]']                         | []                                         | 25     | False |
| 10406936 | ALCOHOL-DEHYDROG-RXN_CPLX0-8015                                                             | 67.5 | []           | 155.1 | CPLX0-8015[c]           | ['ETOH[c]']                            | []                                         | 25     | False |
| 16023116 | AMINOBTDEHYDROG-RXN                                                                         | 5.65 | [54]         | 12.98 | CPLX0-3641[c]           | ['NAD[c]']                             | ['NAD[c]']                                 | 25     | False |
| 20170126 | ANTHRANSYN-RXN                                                                              | 138  | [2500]       | 317   | ANTHRANSYN-CPLX[c]      | ['GLN[c]']                             | ['GLN[c]']                                 | 25     | False |
| 9748544  | ARGININE-TRNA-LIGASE-RXN-ARG-tRNAs/ARG/ATP/PROTON//Charged-ARG-tRNAs/AMP/PPI.52.            | 26   | [900, 12]    | 26    | ARGS-MONOMER[c]         | ['ATP[c]', 'ARG-tRNAs[c]', 'ARG[c]']   | ['ATP[c]', 'ARG[c]']                       | 37     | True  |
| 20853825 | ASNSYNA-RXN_ASNSYNB-CPLX                                                                    | 0.75 | [1200]       | 0.75  | ASNSYNB-CPLX[c]         | ['L-ASPARTATE[c]']                     | ['L-ASPARTATE[c]']                         | 37     | False |
| 20853825 | ASNSYNA-RXN_ASNSYNB-CPLX                                                                    | 0.96 | [110]        | 0.96  | ASNSYNB-CPLX[c]         | ['ATP[c]']                             | ['ATP[c]']                                 | 37     | False |
| 12706338 | ASNSYNB-RXN                                                                                 | 1.56 | [850]        | 1.56  | ASNSYNB-CPLX[c]         | ['L-ASPARTATE[c]']                     | ['L-ASPARTATE[c]']                         | 37     | False |
| 12706338 | ASNSYNB-RXN                                                                                 | 2.18 | [260]        | 2.18  | ASNSYNB-CPLX[c]         | ['ATP[c]']                             | ['ATP[c]']                                 | 37     | False |
| 12706338 | ASNSYNB-RXN                                                                                 | 2.73 | [690]        | 2.73  | ASNSYNB-CPLX[c]         | ['GLN[c]']                             | ['GLN[c]']                                 | 37     | False |
| 11967363 | ASPAMINOTRANS-RXN_ASPAMINOTRANS-DIMER                                                       | 259  | [1900, 590]  | 595   | ASPAMINOTRANS-DIMER[c]  | ['L-ASPARTATE[c]', 'KETOGLUTARATE[c]'] | '2- ['L-ASPARTATE[c]', 'KETOGLUTARATE[c]'] | '2- 25 | False |
| 14767072 | ASPAMINOTRANS-RXN_TYRB-DIMER                                                                | 140  | [3800, 1300] | 321.6 | TYRB-DIMER[c]           | ['L-ASPARTATE[c]', 'KETOGLUTARATE[c]'] | '2- ['L-ASPARTATE[c]', 'KETOGLUTARATE[c]'] | '2- 25 | False |
| 11106175 | ASPARAGHYD-RXN[CCO-PERI-BAC]-ASN/WATER//L-ASPARTATE/AMMONIUM.46.                            | 24   | [15]         | 55.14 | ANSB-CPLX[c]            | ['ASN[p]']                             | ['ASN[c]']                                 | 25     | False |
| 1544480  | ASPARAGINE-TRNA-LIGASE-RXN-ASN-tRNAs/ASN/ATP/PROTON//Charged-ASN-tRNAs/AMP/PPI.52.          | 1.3  | [76]         | 1.3   | ASNS-CPLX[c]            | ['ATP[c]']                             | ['ATP[c]']                                 | 37     | True  |
| 1544480  | ASPARAGINE-TRNA-LIGASE-RXN-ASN-tRNAs/ASN/ATP/PROTON//Charged-ASN-tRNAs/AMP/PPI.52.          | 1.6  | [32]         | 1.6   | ASNS-CPLX[c]            | ['ASN[c]']                             | ['ASN[c]']                                 | 37     | True  |

|                                                                                                                                                                     |                                                                                           |       |              |       |                                     |                                |                                    |     |    |  |       |
|---------------------------------------------------------------------------------------------------------------------------------------------------------------------|-------------------------------------------------------------------------------------------|-------|--------------|-------|-------------------------------------|--------------------------------|------------------------------------|-----|----|--|-------|
| Gou, X.j.; Li, S.; Kong, X.d.; Liu, W.; Sun, Y.h.; Zhang, J. Directed evolution of L-aspartase by mobility of domains Chem. Res. Chin. Univ. 20 50-54 2004 15289581 | ASPARTASE-RXN                                                                             | 180   | [1200]       | 413.5 | ASPARTASE-CPLX[c]                   | ['L-ASPARTATE[c]']             | ['L-ASPARTATE[c]']                 |     |    |  | False |
| 15289581                                                                                                                                                            | ASPARTATE-TRNA-LIGASE-RXN-ASP-tRNAs/L-ASPARTATE/ATP/PROTON//Charged-ASP-tRNAs/AMP/PPI.60. | 12    | [91]         | 12    | ASPS-CPLX[c]                        | ['ATP[c]', 'L-ASPARTATE[c]']   | ['ATP[c]']                         |     | 37 |  | True  |
| 15289581                                                                                                                                                            | ASPARTATE-TRNA-LIGASE-RXN-ASP-tRNAs/L-ASPARTATE/ATP/PROTON//Charged-ASP-tRNAs/AMP/PPI.60. | 30    | [130]        | 30    | ASPS-CPLX[c]                        | ['ATP[c]', 'L-ASPARTATE[c]']   | ['L-ASPARTATE[c]']                 |     | 37 |  | True  |
| Truffa-Bachi, P. Microbial aspartokinases The Enzymes, 3rd Ed. (Boyer, P.D., ed.) 8 509-553 1973                                                                    | ASPARTATEKIN-RXN_ASPKINIHOMOSERDEHYDROGI-CPLX                                             | 56.7  | [1500, 4000] | 113.4 | ASPKINIHOMOSERDEHYDROGI-CPLX[c]     | ['L-ASPARTATE[c]', 'ATP[c]']   | ['L-ASPARTATE[c]', 'ATP[c]']       |     | 27 |  | False |
| Sheperdson, M.; Pardee, A.B. Production and crystallization of aspartate transcarbamylase J. Biol. Chem. 235 3233-3237 1960 16793549                                | ASPCARBTRANS-RXN                                                                          | 1670  | []           | 3837  | ASPCARBTRANS-CPLX[c]                | ['L-ASPARTATE[c]']             | []                                 |     |    |  | False |
| 16480719                                                                                                                                                            | BIOTIN-CARBOXYL-RXN-BCCP-dimers/HCO3/ATP//Carboxybiotin-BCCP/ADP/Pi/PROTON.55.            | 0.228 | [115.2]      | 0.228 | BIOTIN-CARBOXYL-CPLX[c]             | ['ATP[c]']                     | ['ATP[c]']                         |     | 37 |  | False |
| 10989422                                                                                                                                                            | BIOTINLIG-RXN-BCCP-monomers/BIOTIN/ATP//AMP/BCCP-biotin-monomers/PPI/PROTON.62.           | 0.165 | []           | 0.165 | BIOTINLIG-MONOMER[c]                | ['BCCP-monomers[c]']           | []                                 |     | 37 |  | False |
| 10989422                                                                                                                                                            | BRANCHED-CHAINAMINOTRANSFERILEU-RXN                                                       | 48    | [420, 2400]  | 110.3 | BRANCHED-CHAINAMINOTRANSFER-CPLX[c] | ['ILE[c]', 'KETOGLUTARATE[c]'] | '2- ['ILE[c]', 'KETOGLUTARATE[c]'] | '2- | 25 |  | False |

|          |                                                                                  |       |              |           |                                     |                               |     |                               |     |    |       |
|----------|----------------------------------------------------------------------------------|-------|--------------|-----------|-------------------------------------|-------------------------------|-----|-------------------------------|-----|----|-------|
| 10989422 | BRANCHED-CHAINAMINOTRANSFERLEU-RXN_BRANCHED-CHAINAMINOTRANSFER-CPLX (reverse)    | 78    | [2200, 6600] | 179.2     | BRANCHED-CHAINAMINOTRANSFER-CPLX[c] | ['LEU[c]', KETOGLUTARATE[c]'] | '2- | ['LEU[c]', KETOGLUTARATE[c]'] | '2- | 25 | False |
| 10989422 | BRANCHED-CHAINAMINOTRANSFERVAL-RXN                                               | 19    | [2700, 1700] | 43.65     | BRANCHED-CHAINAMINOTRANSFER-CPLX[c] | ['VAL[c]', KETOGLUTARATE[c]'] | '2- | ['VAL[c]', KETOGLUTARATE[c]'] | '2- | 25 | False |
| 18458150 | CARBPSYN-RXN                                                                     | 2.13  | [130]        | 4.893     | CARBPSYN-CPLX[c]                    | ['GLN[c]']                    |     | ['GLN[c]']                    |     | 25 | False |
| 18458150 | CARBPSYN-RXN                                                                     | 4.79  | [44]         | 11        | CARBPSYN-CPLX[c]                    | ['ATP[c]']                    |     | ['ATP[c]']                    |     | 25 | False |
| 21998098 | CATAL-RXN_CPLX0-1683                                                             | 200   | []           | 324.9     | CPLX0-1683[c]                       | ['HYDROGEN-PEROXIDE[c]']      |     | []                            |     | 30 | False |
| 374409   | CATAL-RXN_HYDROPEROXIDI-CPLX                                                     | 16333 | []           | 3.752e+04 | HYDROPEROXIDI-CPLX[c]               | ['HYDROGEN-PEROXIDE[c]']      |     | []                            |     | 25 | False |
| 8831972  | CHORISMATEMUT-RXN_CHORISMUTPREPHENDEHYDRAT-CPLX                                  | 41.4  | [300]        | 41.4      | CHORISMUTPREPHENDEHYDRAT-CPLX[c]    | ['CHORISMATE[c]']             |     | ['CHORISMATE[c]']             |     | 37 | False |
| 6395895  | CHORISMATEMUT-RXN_CHORISMUTPREPHENDEHYDROG-CPLX                                  | 182   | [92]         | 182       | CHORISMUTPREPHENDEHYDROG-CPLX[c]    | ['CHORISMATE[c]']             |     | ['CHORISMATE[c]']             |     | 37 | False |
| 1644758  | CHORPYRLY-RXN                                                                    | 0.82  | [9.7]        | 0.82      | CHORPYRLY-MONOMER[c]                | ['CHORISMATE[c]']             |     | ['CHORISMATE[c]']             |     | 37 | False |
| 12824188 | CITSYN-RXN_CITRATE-SI-SYNTHASE                                                   | 81    | [120]        | 186.1     | CITRATE-SI-SYNTHASE[c]              | ['ACETYL-COA[c]']             |     | ['ACETYL-COA[c]']             |     |    | False |
| 21669179 | CPM-KDOSYNTH-RXN                                                                 | 12.5  | [330]        | 12.5      | CPM-KDOSYNTH-MONOMER[c]             | ['CTP[c]']                    |     | ['CTP[c]']                    |     | 37 | False |
| 16427816 | CTPSYN-RXN                                                                       | 12.8  | []           | 12.8      | CTPSYN-CPLX[c]                      | ['ATP[c]']                    |     | []                            |     | 37 | False |
| 16427816 | CTPSYN-RXN                                                                       | 13.7  | []           | 13.7      | CTPSYN-CPLX[c]                      | ['UTP[c]']                    |     | []                            |     | 37 | False |
| 12383057 | CTPSYN-RXN                                                                       | 6.1   | [320]        | 6.1       | CTPSYN-CPLX[c]                      | ['GLN[c]']                    |     | ['GLN[c]']                    |     | 37 | False |
| 15489861 | CYSTEINE-TRNA-LIGASE-RXN-CYS-tRNAs/CYS/ATP/PROTON//Charged-CYS-tRNAs/AMP/PPI.52. | 2.46  | []           | 2.46      | CYSS-MONOMER[c]                     | ['CYS-tRNAs[c]']              |     | []                            |     | 37 | True  |
| 15248753 | CYTDEAM-RXN                                                                      | 165   | [200]        | 165       | CPLX0-7932[c]                       | ['CYTOSINE[c]']               |     | ['CYTOSINE[c]']               |     | 37 | False |
| 9056491  | DAHPSYN-RXN_AROF-CPLX                                                            | 29.5  | [13]         | 67.77     | AROF-CPLX[c]                        | ['PHOSPHO-ENOL-PYRUVATE[c]']  |     | ['PHOSPHO-ENOL-PYRUVATE[c]']  |     | 25 | False |
| 9387     | DAHPSYN-RXN_AROG-CPLX                                                            | 122   | [5.8]        | 122       | AROG-CPLX[c]                        | ['PHOSPHO-ENOL-PYRUVATE[c]']  |     | ['PHOSPHO-ENOL-PYRUVATE[c]']  |     | 37 | False |
| 9398312  | DAHPSYN-RXN_AROH-CPLX                                                            | 21    | []           | 48.25     | AROH-CPLX[c]                        | ['PHOSPHO-ENOL-PYRUVATE[c]']  |     | []                            |     | 25 | False |
| 1993184  | DALADALALIG-RXN_DALADALALIGA-MONOMER                                             | 7.4   | []           | 17        | DALADALALIGA-MONOMER[c]             | ['D-ALANINE[c]']              |     | []                            |     |    | False |
| 1993184  | DALADALALIG-RXN_DALADALALIGB-CPLX                                                | 17    | []           | 39.06     | DALADALALIGB-CPLX[c]                | ['D-ALANINE[c]']              |     | []                            |     |    | False |
| 1092682  | DAPASYN-RXN                                                                      | 0.283 | [200]        | 0.283     | DAPASYN-CPLX[c]                     | ['S-ADENOSYLMETHIONINE[c]']   |     | ['S-ADENOSYLMETHIONINE[c]']   |     | 37 | False |



|                                            |                                                                                               |       |        |       |                              |                                                |                              |    |       |
|--------------------------------------------|-----------------------------------------------------------------------------------------------|-------|--------|-------|------------------------------|------------------------------------------------|------------------------------|----|-------|
| 12805358                                   | DARAB5PISOM-RXN_CPLX0-1262 (reverse)                                                          | 157   | []     | 157   | CPLX0-1262[c]                | ['ARABINOSE-5P[c]']                            | []                           | 37 | False |
| 12805358                                   | DARAB5PISOM-RXN_CPLX0-1262                                                                    | 255   | []     | 255   | CPLX0-1262[c]                | ['RIBULOSE-5P[c]']                             | []                           | 37 | False |
| 16199563                                   | DARAB5PISOM-RXN_CPLX0-3929 (reverse)                                                          | 218   | []     | 218   | CPLX0-3929[c]                | ['ARABINOSE-5P[c]']                            | []                           | 37 | False |
| 16199563                                   | DARAB5PISOM-RXN_CPLX0-3929                                                                    | 242   | []     | 242   | CPLX0-3929[c]                | ['RIBULOSE-5P[c]']                             | []                           | 37 | False |
| 17996716                                   | DCTP-DEAM-RXN                                                                                 | 1.24  | []     | 1.24  | DCTP-DEAM-CPLX[c]            | ['DCTP[c]']                                    | []                           | 37 | False |
| 11527960                                   | DCYSDSULF-RXN                                                                                 | 72    | []     | 72    | DCYSDSULF-CPLX[c]            | ['D-CYSTEINE[c]']                              | []                           | 37 | False |
| Barbas, C.F.;<br>Wang, Y.F.;<br>Wong, C.H. | DEOXYRIBOSE-P-ALD-RXN (reverse)                                                               | 521.1 | []     | 1197  | DEOXYRIBOSE-P-ALD-MONOMER[c] | ['DEOXY-RIBOSE-5P[c]']                         | []                           | 25 | False |
|                                            | Deoxyribose-5-phosphate aldolase as a synthetic catalyst J. Am. Chem. Soc. 112 2013-2014 1990 |       |        |       |                              |                                                |                              |    |       |
| 2826481                                    | DGTPTRIPHIDRO-RXN                                                                             | 4000  | [10]   | 4000  | DGTPTRIPHIDRO-CPLX[c]        | ['DGTP[c]']                                    | ['DGTP[c]']                  | 37 | False |
| 2531000                                    | DHBAMPLIG-RXN                                                                                 | 5.5   | [2.7]  | 5.5   | ENTE-CPLX[i]                 | ['2-3-DIHYDROXYBENZOATE[c]']                   | ['2-3-DIHYDROXYBENZOATE[c]'] | 37 | False |
| 2531000                                    | DHBAMPLIG-RXN                                                                                 | 5.83  | [1120] | 5.83  | ENTE-CPLX[i]                 | ['ATP[c]']                                     | ['ATP[c]']                   | 37 | False |
| 2144454                                    | DHBDEHYD-RXN                                                                                  | 92.5  | []     | 92.5  | ENTA-CPLX[c]                 | ['DIHYDRO-DIOH-BENZOATE[c]']                   | []                           | 37 | False |
| 2689171                                    | DIAMINOPIMEPIM-RXN                                                                            | 132   | []     | 303.3 | CPLX0-7997[c]                | ['LL-DIAMINOPIMELATE[c]']                      | []                           | 25 | False |
| 6378903                                    | DIAMINOPIMEPIM-RXN (reverse)                                                                  | 67    | []     | 153.9 | CPLX0-7997[c]                | ['MESO-DIAMINOPIMELATE[c]']                    | []                           | 25 | False |
| 15066435                                   | DIHYDRODIPICSYN-RXN                                                                           | 124   | []     | 201.4 | DIHYDRODIPICSYN-CPLX[c]      | ['PYRUVATE[c]', 'L-ASPARTATE-SEMIALDEHYDE[c]'] | []                           | 30 | False |
| 6142052                                    | DIHYDROOROT-RXN                                                                               | 127   | [75.6] | 206.3 | DIHYDROOROT-CPLX[c]          | ['DI-H-OROTATE[c]']                            | ['DI-H-OROTATE[c]']          | 30 | False |
| 6142052                                    | DIHYDROOROT-RXN (reverse)                                                                     | 195   | [1070] | 316.8 | DIHYDROOROT-CPLX[c]          | ['CARBAMYUL-L-ASPARTATE[c]']                   | ['CARBAMYUL-L-ASPARTATE[c]'] | 30 | False |
| 8969520                                    | DIMESULFREDUCT-RXN-CPD-7670/CPD-9728/WATER//DMSO/REDUCED-MENAQUINONE.50.                      | 79.9  | []     | 129.8 | DIMESULFREDUCT-CPLX[i]       | ['DMSO[p]']                                    | []                           | 30 | False |
| 11380254                                   | DTDPGLUCDEHYDRAT-RXN_DTDPLUCDEHYDRAT-CPLX                                                     | 4.9   | []     | 4.9   | DTDPGLUCDEHYDRAT-CPLX[c]     | ['DTDP-D-GLUCOSE[c]']                          | []                           | 37 | False |
| 346589                                     | DUTP-PYROP-RXN_DUTP-PYROP-CPLX                                                                | 58.33 | []     | 94.76 | DUTP-PYROP-CPLX[c]           | ['DUTP[c]']                                    | []                           | 30 | False |
| 16766526                                   | DUTP-PYROP-RXN_G7164-MONOMER                                                                  | 22    | []     | 22    | G7164-MONOMER[c]             | ['DUTP[c]']                                    | []                           | 37 | False |

|          |                                                                                                                   |       |          |        |                          |                                     |                                |    |       |
|----------|-------------------------------------------------------------------------------------------------------------------|-------|----------|--------|--------------------------|-------------------------------------|--------------------------------|----|-------|
| 15938625 | DXPREDISOM-RXN (reverse)                                                                                          | 29    | [0.5]    | 29     | DXPREDISOM-CPLX[c]       | ['DEOXYXYLULOSE-5P[c]', 'NADPH[c]'] | ['NADPH[c]']                   | 37 | False |
| 21119630 | DXS-RXN                                                                                                           | 345   | []       | 345    | CPLX0-743[c]             | ['PYRUVATE[c]', 'GAP[c]']           | []                             | 37 | False |
| 7751290  | ERYTH4PDEHYDROG-RXN                                                                                               | 169   | [74]     | 169    | ERYTH4PDEHYDROG-CPLX[c]  | ['NAD[c]']                          | ['NAD[c]']                     | 37 | False |
| 15531627 | F16ALDOLASE-RXN_FRUCBISALD-CLASSII (reverse)                                                                      | 14.17 | [140]    | 23.02  | FRUCBISALD-CLASSII[c]    | ['FRUCTOSE-16-DIPHOSPHATE[c]']      | ['FRUCTOSE-16-DIPHOSPHATE[c]'] | 30 | False |
| 9878448  | F16ALDOLASE-RXN_FRUCBISALD-CLASSI (reverse)                                                                       | 0.35  | [20]     | 0.5686 | FRUCBISALD-CLASSI[c]     | ['FRUCTOSE-16-DIPHOSPHATE[c]']      | ['FRUCTOSE-16-DIPHOSPHATE[c]'] | 30 | False |
| 19073594 | F16BDEPHOS-RXN[CCO-CYTOSOL]-FRUCTOSE-16-DIPHOSPHATE/WATER//FRUCTOSE-6P/Pi.59...CPLX0-303                          | 5.7   | [70]     | 5.7    | CPLX0-303[c]             | ['FRUCTOSE-16-DIPHOSPHATE[c]']      | ['FRUCTOSE-16-DIPHOSPHATE[c]'] | 37 | False |
| 19073594 | F16BDEPHOS-RXN[CCO-CYTOSOL]-FRUCTOSE-16-DIPHOSPHATE/WATER//FRUCTOSE-6P/Pi.59...CPLX0-7776                         | 2.5   | [100]    | 2.5    | CPLX0-7776[c]            | ['FRUCTOSE-16-DIPHOSPHATE[c]']      | ['FRUCTOSE-16-DIPHOSPHATE[c]'] | 37 | False |
| 19073594 | F16BDEPHOS-RXN[CCO-CYTOSOL]-FRUCTOSE-16-DIPHOSPHATE/WATER//FRUCTOSE-6P/Pi.59...EG11239-MONOMER                    | 5.3   | [2400]   | 5.3    | EG11239-MONOMER[c]       | ['FRUCTOSE-16-DIPHOSPHATE[c]']      | ['FRUCTOSE-16-DIPHOSPHATE[c]'] | 37 | False |
| 19073594 | F16BDEPHOS-RXN[CCO-CYTOSOL]-FRUCTOSE-16-DIPHOSPHATE/WATER//FRUCTOSE-6P/Pi.59...F16B-CPLX                          | 14.6  | [20]     | 14.6   | F16B-CPLX[c]             | ['FRUCTOSE-16-DIPHOSPHATE[c]']      | ['FRUCTOSE-16-DIPHOSPHATE[c]'] | 37 | False |
| 2659070  | FGAMSYN-RXN                                                                                                       | 0.05  | [64, 51] | 0.05   | FGAMSYN-MONOMER[c]       | ['GLN[c]', 'ATP[c]']                | ['GLN[c]', 'ATP[c]']           | 37 | False |
| 1099093  | FORMATEDEHYDROG-RXN-FORMATE/CPD-9728/PROTON//CARBON-DIOXIDE/REDUCED-MENAQUINONE/PROTON.67...FORMATEDEHYDROGN-CPLX | 563.3 | []       | 915.1  | FORMATEDEHYDROGN-CPLX[i] | ['FORMATE[p]']                      | []                             | 30 | False |
| 15157072 | FRUCTOKINASE-RXN                                                                                                  | 13    | [1800]   | 29.87  | EG11288-MONOMER[c]       | ['BETA-D-FRUCTOSE[c]', 'ATP[c]']    | ['ATP[c]']                     | 25 | False |
| 10821675 | FUCPALDOL-RXN (reverse)                                                                                           | 19.3  | []       | 19.3   | CPLX0-7633[c]            | ['FUCULOSE-1P[c]']                  | []                             | 37 | False |
| 8422384  | FUMHYDR-RXN_FUMARASE-A                                                                                            | 3000  | [600]    | 6892   | FUMARASE-A[c]            | ['FUM[c]']                          | ['FUM[c]']                     |    | False |
| 1329945  | FUMHYDR-RXN_FUMARASE-A (reverse)                                                                                  | 3100  | [700]    | 7122   | FUMARASE-A[c]            | ['MAL[c]']                          | ['MAL[c]']                     | 25 | False |
| 8203917  | FUMHYDR-RXN_FUMARASE-C                                                                                            | 3100  | [620]    | 7122   | FUMARASE-C[c]            | ['FUM[c]']                          | ['FUM[c]']                     | 25 | False |
| 12021453 | FUMHYDR-RXN_FUMARASE-C (reverse)                                                                                  | 595.2 | [857]    | 1367   | FUMARASE-C[c]            | ['MAL[c]']                          | ['MAL[c]']                     |    | False |

|                                                                                                                                                   |                                                                                          |      |            |       |                             |                                                               |                            |    |       |
|---------------------------------------------------------------------------------------------------------------------------------------------------|------------------------------------------------------------------------------------------|------|------------|-------|-----------------------------|---------------------------------------------------------------|----------------------------|----|-------|
| 15723541                                                                                                                                          | GABATRANSAM-RXN_G6646-MONOMER                                                            | 47.4 | []         | 108.9 | G6646-MONOMER[c]            | ['4-AMINO-BUTYRATE[c]']                                       | []                         | 25 | False |
| 10820011                                                                                                                                          | GALACTURIDYLYLTRANS-RXN                                                                  | 283  | []         | 566   | GALACTURIDYLYLTRANS-CPLX[c] | ['CPD-14553[c]', 'GLC-1-P[c]']                                | []                         | 27 | False |
| 7873670                                                                                                                                           | GALACTURIDYLYLTRANS-RXN (reverse)                                                        | 960  | [200]      | 1920  | GALACTURIDYLYLTRANS-CPLX[c] | ['GALACTOSE-1P[c]', 'CPD-12575[c]']                           | ['CPD-12575[c]']           | 27 | False |
| Zhang, Q.;<br>Liu, H.w.                                                                                                                           | GALPMUT-RXN (reverse)                                                                    | 27   | []         | 27    | GALPMUT-MONOMER[c]          | ['UDP-D-GALACTO-14-FURANOSE[c]']                              | []                         | 37 | False |
| Studies of UDP-galactopyranose mutase from Escherichia coli: An unusual role of reduced FAD in its catalysis J. Am. Chem. Soc. 122 9065-9070 2000 |                                                                                          |      |            |       |                             |                                                               |                            |    |       |
| 19384989                                                                                                                                          | GARTRANSFORMYL2-RXN                                                                      | 37.6 | [45]       | 86.38 | GARTRANSFORMYL2-MONOMER[c]  | ['5-PHOSPHO-RIBOSYL-GLYCINEAMIDE[c]', 'ATP[c]', 'FORMATE[c]'] | ['ATP[c]']                 | 25 | False |
| 9772162                                                                                                                                           | GKI-RXN_GKI-MONOMER                                                                      | 2.5  | [61, 51]   | 7.071 | GKI-MONOMER[c]              | ['ATP[c]', 'GLYCERATE[c]']                                    | ['ATP[c]', 'GLYCERATE[c]'] | 22 | False |
| 17079236                                                                                                                                          | GLUC1PADENYLTRANS-RXN                                                                    | 370  | [590]      | 370   | GLUC1PADENYLTRANS-CPLX[c]   | ['ATP[c]', 'GLC-1-P[c]']                                      | ['ATP[c]']                 | 37 | False |
| 15157072                                                                                                                                          | GLUCOKIN-RXN                                                                             | 410  | [260]      | 941.9 | GLUCOKIN-MONOMER[c]         | ['GLC[c]', 'ATP[c]']                                          | ['ATP[c]']                 | 25 | False |
| 25484615                                                                                                                                          | GLUCOSE-1-PHOSPHAT-RXN[CCO-CYTOSOL]-GLC-1-P/WATER//Glucopyranose/Pi.45...EG11850-MONOMER | 10.2 | []         | 10.2  | EG11850-MONOMER[c]          | ['GLC-1-P[c]']                                                | []                         | 37 | False |
| 16990279                                                                                                                                          | GLUCOSE-6-PHOSPHATASE-RXN_EG11470-MONOMER                                                | 14   | []         | 32.16 | EG11470-MONOMER[c]          | ['GLC-6-P[c]']                                                | []                         |    | False |
| 19678710                                                                                                                                          | GLUCUROISOM-RXN-CPD-15530//CPD-12537.21. (reverse)                                       | 196  | []         | 318.4 | UXAC-MONOMER[c]             | ['CPD-15530[c]']                                              | []                         | 30 | False |
| 3003503                                                                                                                                           | GLURS-RXN-GLT-tRNAs/GLT/ATP/PROTON//Charged-GLT-tRNAs/AMP/PPI.52.                        | 0.8  | [200, 100] | 0.8   | GLURS-MONOMER[c]            | ['GLT[c]', 'ATP[c]']                                          | ['GLT[c]', 'ATP[c]']       | 37 | False |
| 20853825                                                                                                                                          | GLUTAMIN-RXN_ASNSYNB-CPLX                                                                | 6.6  | [1700]     | 6.6   | ASNSYNB-CPLX[c]             | ['GLN[c]']                                                    | ['GLN[c]']                 | 37 | False |
| 18459799                                                                                                                                          | GLUTAMIN-RXN_CPLX0-7694                                                                  | 91.4 | [7300]     | 210   | CPLX0-7694[c]               | ['GLN[c]']                                                    | ['GLN[c]']                 |    | False |
| 18459799                                                                                                                                          | GLUTAMIN-RXN_CPLX0-7695                                                                  | 101  | [30600]    | 232   | CPLX0-7695[c]               | ['GLN[c]']                                                    | ['GLN[c]']                 |    | False |
| 12383057                                                                                                                                          | GLUTAMIN-RXN_CTPSYN-CPLX                                                                 | 4.98 | []         | 4.98  | CTPSYN-CPLX[c]              | ['GLN[c]']                                                    | []                         | 37 | False |

|                                                                                                             |                                                                                        |       |             |        |                                  |                                      |                        |    |       |
|-------------------------------------------------------------------------------------------------------------|----------------------------------------------------------------------------------------|-------|-------------|--------|----------------------------------|--------------------------------------|------------------------|----|-------|
| 9657697                                                                                                     | GLUTAMINE-TRNA-LIGASE-RXN-GLN-tRNAs/GLN/ATP/PROTON//Charged-GLN-tRNAs/AMP/PPI.52.      | 2.62  | [114]       | 2.62   | GLNS-MONOMER[c]                  | ['GLN[c]']                           | ['GLN[c]']             | 37 | True  |
| 9657697                                                                                                     | GLUTAMINE-TRNA-LIGASE-RXN-GLN-tRNAs/GLN/ATP/PROTON//Charged-GLN-tRNAs/AMP/PPI.52.      | 2.8   | [110]       | 2.8    | GLNS-MONOMER[c]                  | ['ATP[c]']                           | ['ATP[c]']             | 37 | True  |
| 15797252                                                                                                    | GLUTAMINESYN-RXN                                                                       | 36    | [200, 3300] | 82.71  | GLUTAMINESYN-OLIGOMER[c]         | ['ATP[c]', 'GLT[c]']                 | ['ATP[c]', 'GLT[c]']   |    | False |
| 1924337                                                                                                     | GLUTATHIONE-REDUCT-NADPH-RXN                                                           | 733.3 | []          | 1191   | GLUTATHIONE-REDUCT-NADPH-CPLX[c] | ['OXIDIZED-GLUTATHIONE[c]']          | []                     | 30 | True  |
| 19797049                                                                                                    | GLUTDECARBOX-RXN_GLUTDECARBOXB-CPLX                                                    | 24.85 | [2320]      | 24.85  | GLUTDECARBOXB-CPLX[c]            | ['GLT[c]']                           | ['GLT[c]']             | 37 | False |
| 23879525                                                                                                    | GLUTDEHYD-RXN_GDHA-CPLX                                                                | 37.3  | [18.4]      | 85.69  | GDHA-CPLX[c]                     | ['NADP[c]']                          | ['NADP[c]']            |    | False |
| 17568739                                                                                                    | GLUTRACE-RXN                                                                           | 12.17 | [1200]      | 27.96  | GLUTRACE-MONOMER[c]              | ['GLT[c]']                           | ['GLT[c]']             |    | False |
| 17568739                                                                                                    | GLUTRACE-RXN (reverse)                                                                 | 43.33 | []          | 99.55  | GLUTRACE-MONOMER[c]              | ['D-GLT[c]']                         | []                     |    | False |
| 12370189                                                                                                    | GLUTRNAREDUCT-RXN-GLUTAMATE-1-SEMIALDEHYDE/GLT-tRNAs/NADP//Charged-GLT-tRNAs/NADPH.65. | 0.15  | [39]        | 0.15   | CPLX0-3741[c]                    | ['Charged-GLT-tRNAs[c]', 'NADPH[c]'] | ['NADPH[c]']           | 37 | False |
| Thorner, J.W.; Paulus, H. Glycerol and glycerate kinases The Enzymes,3rd ed.(Boyer,P.D.,ed.) 8 487-508 1973 | GLYCEROL-KIN-RXN                                                                       | 193.3 | []          | 444.1  | GLYCEROL-KIN-CPLX[c]             | ['GLYCEROL[c]']                      | []                     | 25 | False |
| 16731973                                                                                                    | GLYCOLALD-DEHYDROG-RXN                                                                 | 18.33 | []          | 42.11  | ALD-CPLX[c]                      | ['GLYCOLALDEHYDE[c]']                | []                     |    | False |
| 21059411                                                                                                    | GLYOHMETRANS-RXN-SER/THF//GLY/METHYLENE-THF/WATER.33.                                  | 10.67 | [300]       | 17.33  | GLYOHMETRANS-CPLX[c]             | ['SER[c]']                           | ['SER[c]']             | 30 | False |
| 14556652                                                                                                    | GLYOXI-RXN                                                                             | 388   | []          | 891.4  | GLYOXI-CPLX[c]                   | ['METHYL-GLYOXAL[c]']                | []                     |    | False |
| 16567800                                                                                                    | GLYOXII-RXN_CPLX0-3954                                                                 | 1.02  | []          | 1.02   | CPLX0-3954[c]                    | ['S-LACTOYL-GLUTATHIONE[c]']         | []                     | 37 | False |
| 22173092                                                                                                    | GLYOXII-RXN_G6475-MONOMER                                                              | 61    | []          | 140.1  | G6475-MONOMER[c]                 | ['S-LACTOYL-GLUTATHIONE[c]']         | []                     | 25 | False |
| 21696459                                                                                                    | GLYOXIII-RXN_CPLX0-861                                                                 | 2.62  | []          | 2.62   | CPLX0-861[c]                     | ['METHYL-GLYOXAL[c]']                | []                     | 37 | False |
| 11237876                                                                                                    | GLYOXYLATE-REDUCTASE-NADP+-RXN_CPLX0-235                                               | 203   | []          | 466.4  | CPLX0-235[i]                     | ['GLYOX[c]']                         | []                     | 25 | True  |
| 21298178                                                                                                    | GMP-REDUCT-RXN                                                                         | 0.28  | [5.5, 14.7] | 0.6433 | GMP-REDUCT-CPLX[c]               | ['GMP[c]', 'NADPH[c]']               | ['GMP[c]', 'NADPH[c]'] | 25 | False |

|                                                                                                  |                                                                                                           |       |        |        |                                   |                                             |                   |    |       |
|--------------------------------------------------------------------------------------------------|-----------------------------------------------------------------------------------------------------------|-------|--------|--------|-----------------------------------|---------------------------------------------|-------------------|----|-------|
| 7775463                                                                                          | GSPAMID-RXN                                                                                               | 2.1   | []     | 2.1    | GSP-CPLX[c]                       | ['GLUTATHIONYLSPERMIDINE[c]]                |                   | 37 | False |
| 7775463                                                                                          | GSPSYN-RXN                                                                                                | 7     | [60]   | 7      | GSP-CPLX[c]                       | ['SPERMIDINE[c]']                           | ['SPERMIDINE[c]'] | 37 | False |
| 9211333                                                                                          | GTP-CYCLOHYDRO-II-RXN                                                                                     | 0.15  | [30]   | 0.15   | GTP-CYCLOHYDRO-II-CPLX[c]         | ['GTP[c]']                                  | ['GTP[c]']        | 37 | False |
| 16766526                                                                                         | GUANOSINE-DIPHOSPHATASE-RXN_G6580-MONOMER                                                                 | 3.4   | [640]  | 3.4    | G6580-MONOMER[c]                  | ['GDP[c]']                                  | ['GDP[c]']        | 37 | False |
| 9100006                                                                                          | GUANPRIBOSYLTRAN-RXN_GPT-CPLX                                                                             | 112   | [4.3]  | 257.3  | GPT-CPLX[i]                       | ['GUANINE[c]', 'PRPP[c]']                   | ['GUANINE[c]']    | 25 | False |
| 17176045                                                                                         | H2NEOPTERINALDOL-RXN                                                                                      | 0.082 | []     | 0.1884 | CPLX0-3936[c]                     | ['DIHYDRO-NEO-PTERIN[c]']                   | []                | 25 | False |
| 17698004                                                                                         | H2NEOPTERINP3PYROPHOSPHOHYDRO-RXN                                                                         |       | []     | 11.6   | H2NEOPTERINP3PYROPHOSPHOHYDRO-RXN | ['DIHYDRO-NEOPTERIN-P3[c]']                 | []                | 37 | False |
| 9266856                                                                                          | HISTIDINE-TRNA-LIGASE-RXN-HIS-tRNAs/HIS/ATP/PROTON//Charged-HIS-tRNAs/AMP/PPI.52.                         | 34    | [560]  | 34     | HISS-CPLX[c]                      | ['ATP[c]']                                  | ['ATP[c]']        | 37 | True  |
| 9266856                                                                                          | HISTIDINE-TRNA-LIGASE-RXN-HIS-tRNAs/HIS/ATP/PROTON//Charged-HIS-tRNAs/AMP/PPI.52.                         | 7     | [8]    | 7      | HISS-CPLX[c]                      | ['HIS[c]']                                  | ['HIS[c]']        | 37 | True  |
| 16966333                                                                                         | HISTIDPHOS-RXN[CCO-CYTOSOL]-L-HISTIDINOL-P/WATER//HISTIDINOL/Pi.49.                                       | 2140  | []     | 4916   | IMIDHISTID-CPLX[c]                | ['L-HISTIDINOL-P[c]']                       | []                | 25 | False |
| 9211277                                                                                          | HOLO-ACP-SYNTH-RXN-apo-ACP/CO-A//3-5-ADP/ACP/PROTON.33...HOLO-ACP-SYNTH-CPLX                              | 1.17  | [50]   | 1.17   | HOLO-ACP-SYNTH-CPLX[c]            | ['apo-ACP[c]', 'CO-A[c]']                   | ['CO-A[c]']       | 37 | False |
| Truffa-Bachi, P. Microbial aspartokinases The Enzymes, 3rd Ed. (Boyer, P.D., ed.) 8 509-553 1973 | HOMOSERDEHYDROG-RXN-HOMOSER/NADP//L-ASPARTATE-SEMIALDEHYDE/NADPH/PROTON.53...ASPKINIHOMOSERDEHYDROGI-CPLX | 400   | [120]  | 800    | ASPKINIHOMOSERDEHYDROGI-CPLX[c]   | ['L-ASPARTATE-SEMIALDEHYDE[c]', 'NADPH[c]'] | ['NADPH[c]']      | 27 | False |
| 8973190                                                                                          | HOMOSERKIN-RXN                                                                                            | 18.3  | [130]  | 29.73  | HOMOSERKIN-CPLX[c]                | ['HOMO-SER[c]', 'ATP[c]']                   | ['ATP[c]']        | 30 | False |
| 17442255                                                                                         | HOMSUCTRAN-RXN                                                                                            | 25.7  | [280]  | 59.04  | HOMSUCTRAN-CPLX[c]                | ['SUC-COA[c]', 'HOMO-SER[c]']               | ['SUC-COA[c]']    | 25 | False |
| 9100006                                                                                          | HYPOXANPRIBOSYLTRAN-RXN_GPT-CPLX                                                                          | 54.8  | []     | 125.9  | GPT-CPLX[i]                       | ['HYPOXANTHINE[c]']                         | []                | 25 | False |
| 2494074                                                                                          | IGPSYN-RXN                                                                                                | 7.2   | []     | 7.2    | PRAI-IGPS[c]                      | ['CARBOXYPHENYLAMINO-DEOXYRIBULOSE-P[c]']   | []                | 37 | False |
| 18990827                                                                                         | IMP-DEHYDROG-RXN                                                                                          | 13    | [2000] | 29.87  | IMP-DEHYDROG-CPLX[c]              | ['IMP[c]', 'NAD[c]']                        | ['NAD[c]']        |    | False |
| 21279421                                                                                         | INOPHOSPHOR-RXN_DEOD-CPLX                                                                                 | 6200  | []     | 6200   | DEOD-CPLX[c]                      | ['INOSINE[c]']                              | []                | 37 | False |
| 14640961                                                                                         | INORGPYROPHOSPHAT-RXN[CCO-CYTOSOL]-PPI/WATER//Pi/PROTON.34.                                               | 390   | [0.13] | 896    | CPLX0-243[c]                      | ['PPI[c]']                                  | ['PPI[c]']        | 25 | True  |

|          |                                                                                    |       |            |        |                                      |                                                 |                              |    |       |
|----------|------------------------------------------------------------------------------------|-------|------------|--------|--------------------------------------|-------------------------------------------------|------------------------------|----|-------|
| 2139795  | ISOCHORSYN-RXN_ENTC-MONOMER                                                        | 1.8   | []         | 1.8    | ENTC-MONOMER[c]                      | ['ISOCHORISMATE[c]']                            | []                           | 37 | False |
| 2139795  | ISOCHORSYN-RXN_ENTC-MONOMER (reverse)                                              | 2.88  | []         | 2.88   | ENTC-MONOMER[c]                      | ['CHORISMATE[c]']                               | []                           | 37 | False |
| 17240978 | ISOCHORSYN-RXN_MENF-CPLX (reverse)                                                 | 3.55  | []         | 3.55   | MENF-CPLX[c]                         | ['CHORISMATE[c]']                               | []                           | 37 | False |
| 17401542 | ISOCITDEH-RXN                                                                      | 106.3 | []         | 86.34  | ISOCITHASE-CPLX[c]                   | ['THREO-DS-ISO-CITRATE[c]']                     | []                           | 40 | True  |
| 17401542 | ISOCITDEH-RXN                                                                      | 88.1  | [39.2]     | 71.56  | ISOCITHASE-CPLX[c]                   | ['NADP[c]']                                     | ['NADP[c]']                  | 40 | True  |
| 8672449  | ISOLEUCINE-TRNA-LIGASE-RXN-ILE-tRNAs/ILE/ATP/PROTON//Charged-ILE-tRNAs/AMP/PPI.52. | 80.4  | [3.6, 280] | 80.4   | ILES-MONOMER[c]                      | ['ILE[c]', 'ATP[c]']                            | ['ILE[c]', 'ATP[c]']         | 37 | True  |
| 9772162  | KDGDALDOL-RXN                                                                      | 27.3  | []         | 77.22  | CPLX0-7615[c]                        | ['5-KETO-4-DEOXY-D-GLUCARATE[c]']               | []                           | 22 | False |
| 15308670 | KDO-8PSYNTH-RXN                                                                    | 6.1   | [6]        | 6.1    | KDO-8PSYNTH-CPLX[c]                  | ['PHOSPHO-ENOL-PYRUVATE[c]', 'ARABINOSE-5P[c]'] | ['PHOSPHO-ENOL-PYRUVATE[c]'] | 37 | False |
| 11094340 | KDPGALDOL-RXN                                                                      | 283.8 | []         | 652    | KDPGALDOL-4OH2OXOGLUTARALDOL-CPLX[c] | ['2-KETO-3-DEOXY-6-P-GLUCONATE[c]']             | []                           | 25 | False |
| 8706750  | L-ASPARTATE-OXID-RXN                                                               | 2.6   | [5200]     | 5.973  | L-ASPARTATE-OXID-MONOMER[c]          | ['L-ASPARTATE[c]', 'OXYGEN-MOLECULE[c]']        | ['L-ASPARTATE[c]']           | 25 | False |
| 20416269 | L-GLN-FRUCT-6-P-AMINOTRANS-RXN-FRUCTOSE-6P/GLN//CPD-13469/GLT.31.                  | 12    | [230]      | 27.57  | L-GLN-FRUCT-6-P-AMINOTRANS-CPLX[c]   | ['GLT[c]']                                      | ['GLT[c]']                   | 25 | False |
| 17559838 | L-GLN-FRUCT-6-P-AMINOTRANS-RXN-FRUCTOSE-6P/GLN//CPD-13469/GLT.31. (reverse)        | 14.2  | []         | 14.2   | L-GLN-FRUCT-6-P-AMINOTRANS-CPLX[c]   | ['FRUCTOSE-6P[c]']                              | []                           | 37 | False |
| 18754693 | L-RHAMNONATE-DEHYDRATASE-RXN (reverse)                                             | 3.2   | []         | 7.352  | CPLX0-7722[c]                        | ['L-RHAMNONATE[c]']                             | []                           | 25 | False |
| 15110746 | LEUCINE-TRNA-LIGASE-RXN-LEU-tRNAs/LEU/ATP/PROTON//Charged-LEU-tRNAs/AMP/PPI.52.    | 5     | [240]      | 5      | LEUS-MONOMER[c]                      | ['ATP[c]']                                      | ['ATP[c]']                   | 37 | True  |
| 15110746 | LEUCINE-TRNA-LIGASE-RXN-LEU-tRNAs/LEU/ATP/PROTON//Charged-LEU-tRNAs/AMP/PPI.52.    | 5.1   | [20]       | 5.1    | LEUS-MONOMER[c]                      | ['LEU[c]']                                      | ['LEU[c]']                   | 37 | True  |
| 21059411 | LTAA-RXN_GLYOHMETRANS-CPLX                                                         | 0.5   | []         | 0.8123 | GLYOHMETRANS-CPLX[c]                 | ['L-ALLO-THREONINE[c]']                         | []                           | 30 | False |
| 21059411 | LTAA-RXN_LTAA-CPLX                                                                 | 6.27  | []         | 10.19  | LTAA-CPLX[c]                         | ['L-ALLO-THREONINE[c]']                         | []                           | 30 | False |
| 11741871 | LXULRU5P-RXN_G7859-MONOMER                                                         | 2.9   | []         | 6.662  | G7859-MONOMER[c]                     | ['L-XYLULOSE-5-P[c]']                           | []                           | 25 | False |

|          |                                                                                                                |       |              |        |                                      |                                    |                                    |    |       |
|----------|----------------------------------------------------------------------------------------------------------------|-------|--------------|--------|--------------------------------------|------------------------------------|------------------------------------|----|-------|
| 21278708 | LYSDECARBOX-RXN_LYSDECARBOX-CPLX                                                                               | 30    | [368]        | 295.5  | LYSDECARBOX-CPLX[c]                  | ['LYS[c]']                         | ['LYS[c]']                         | 4  | False |
| 15362869 | LYSINE-TRNA-LIGASE-RXN-LYS/LYS-tRNAs/ATP/PROTON//Charged-LYS-tRNAs/AMP/PPI.52...LYSS-CPLX                      | 1.8   | [2.6]        | 1.8    | LYSS-CPLX[c]                         | ['ATP[c]']                         | ['ATP[c]']                         | 37 | True  |
| 10387054 | LYSINE-TRNA-LIGASE-RXN-LYS/LYS-tRNAs/ATP/PROTON//Charged-LYS-tRNAs/AMP/PPI.52...LYSS-CPLX                      | 6.1   | [2.7]        | 6.1    | LYSS-CPLX[c]                         | ['LYS[c]']                         | ['LYS[c]']                         | 37 | True  |
| 14597191 | LYXK-RXN                                                                                                       | 110   | []           | 110    | LYXK-CPLX[c]                         | ['L-XYLULOSE[c]']                  | []                                 | 37 | False |
| 17947381 | MALATE-DEH-RXN (reverse)                                                                                       | 931   | []           | 1512   | MALATE-DEHASE[c]                     | ['OXALACETIC-ACID[c]']             | []                                 | 30 | False |
| 17557829 | MALIC-NADP-RXN                                                                                                 | 66.6  | [3410, 41.5] | 108.2  | MALIC-NADP-CPLX[c]                   | ['MAL[c]', 'NADP[c]']              | ['MAL[c]', 'NADP[c]']              | 30 | False |
| 11814333 | MALONYL-COA-ACP-TRANSACYL-RXN-ACP/MALONYL-COA//MALONYL-ACP/CO-A.34. (reverse)                                  | 1580  | []           | 3630   | MALONYL-COA-ACP-TRANSACYL-MONOMER[c] | ['ACP[c]', 'MALONYL-COA[c]']       | []                                 |    | False |
| 2111176  | MANNPDEHYDROG-RXN (reverse)                                                                                    | 190   | [200]        | 436.5  | MANNPDEHYDROG-MONOMER[c]             | ['MANNITOL-1P[c]', 'NAD[c]']       | ['NAD[c]']                         | 25 | False |
| 2111176  | MANNPDEHYDROG-RXN                                                                                              | 240   | [10]         | 551.4  | MANNPDEHYDROG-MONOMER[c]             | ['FRUCTOSE-6P[c]', 'NADH[c]']      | ['NADH[c]']                        | 25 | False |
| 19370061 | METBALT-RXN                                                                                                    | 1.8   | []           | 4.135  | O-SUCCHOMOSERLYASE-CPLX[c]           | ['O-SUCCINYL-L-HOMOSERINE[c]']     | []                                 | 25 | False |
| 15049687 | METHGLYSYN-RXN                                                                                                 | 220   | [200]        | 505.4  | METHGLYSYN-CPLX[c]                   | ['DIHYDROXY-ACETONE-PHOSPHATE[c]'] | ['DIHYDROXY-ACETONE-PHOSPHATE[c]'] | 25 | False |
| 2126467  | METHIONINE-TRNA-LIGASE-RXN-Elongation-tRNAMet/MET/ATP/PROTON//Charged-MET-tRNAs/AMP/PPI.61.                    | 3.3   | []           | 3.3    | METG-CPLX[c]                         | ['Elongation-tRNAMet[c]']          | []                                 | 37 | True  |
| 9391059  | METHIONYL-TRNA-FORMYLTRANSFERASE-RXN-10-FORMYL-THF/L-methionyl-tRNAfmet//THF/N-formyl-L-methionyl-tRNAfmet.70. | 41.52 | []           | 41.52  | EG11268-MONOMER[c]                   | ['L-methionyl-tRNAfmet[c]']        | []                                 | 37 | False |
| 10769117 | METHYLMALONYL-COA-MUT-RXN (reverse)                                                                            | 0.2   | [11.2]       | 0.2    | CPLX0-7741[c]                        | ['SUC-COA[c]']                     | ['SUC-COA[c]']                     | 37 | False |
| 17059210 | METHYLTHIOADENOSINE-NUCLEOSIDASE-RXN                                                                           | 4     | []           | 9.19   | CPLX0-1541[c]                        | ['5-METHYLTHIOADENOSINE[c]']       | []                                 | 25 | False |
| 20364820 | MHPELY-RXN (reverse)                                                                                           | 205.4 | []           | 471.9  | MHPELY-MONOMER[c]                    | ['ACETALD[c]']                     | []                                 | 25 | False |
| 10026151 | MMUM-RXN                                                                                                       | 0.38  | [45]         | 0.6173 | MMUM-MONOMER[c]                      | ['HOMO-CYS[c]']                    | ['HOMO-CYS[c]']                    | 30 | False |

|          |                                                                                 |       |            |       |                                     |                                             |                                             |        |       |
|----------|---------------------------------------------------------------------------------|-------|------------|-------|-------------------------------------|---------------------------------------------|---------------------------------------------|--------|-------|
| 18081839 | NACGLCTRANS-RXN                                                                 | 0.93  | [150]      | 0.93  | NACGLCTRANS-MONOMER[c]              | ['UDP-N-ACETYL-D-GLUCOSAMINE[c]']           | ['UDP-N-ACETYL-D-GLUCOSAMINE[c]']           | 37     | False |
| 11488932 | NAD-KIN-RXN                                                                     | 125   | [2000]     | 125   | CPLX0-682[c]                        | ['NAD[c]']                                  | ['NAD[c]']                                  | 37     | False |
| 11488932 | NAD-KIN-RXN                                                                     | 55    | [2500]     | 55    | CPLX0-682[c]                        | ['ATP[c]']                                  | ['ATP[c]']                                  | 37     | False |
| 21832062 | NADH-DEHYDROG-A-RXN-NADH/UBIQUINONE-8/PROTON//NAD/CPD-9956/PROTON.46. (reverse) | 26    | [13]       | 42.24 | NADH-DHI-CPLX[i]                    | ['NADH[c]']                                 | ['NADH[c]']                                 | 30     | True  |
| 8083170  | NAG1P-URIDYLTRANS-RXN                                                           | 12.4  | [70, 100]  | 12.4  | NAG1P-URIDYLTRANS-CPLX[c]           | ['N-ACETYL-D-GLUCOSAMINE-1-P[c]', 'UTP[c]'] | ['N-ACETYL-D-GLUCOSAMINE-1-P[c]', 'UTP[c]'] | 37     | False |
| 15157072 | NANK-RXN-N-ACETYL-D-MANNOSAMINE/ATP/N-ACETYL-D-MANNOSAMINE-6P/ADP/PROTON.65.    | 83    | [510]      | 190.7 | NANK-MONOMER[c]                     | ['N-ACETYL-D-MANNOSAMINE[c]', 'ATP[c]']     | ['ATP[c]']                                  | 25     | False |
| 24530526 | NMNAMIDOHYDRO-RXN                                                               | 4.1   | []         | 4.1   | CPLXECOLI-7943[c]                   | ['NICOTINAMIDE_NUCLEOTIDE[c]']              | ['NICOTINAMIDE_NUCLEOTIDE[c]']              | 37     | False |
| 19370061 | O-SUCCHOMOSERLYASE-RXN                                                          | 121   | [640]      | 278   | O-SUCCHOMOSERLYASE-CPLX[c]          | ['O-SUCCINYL-L-HOMOSERINE[c]', 'CYS[c]']    | ['CYS[c]']                                  | 25     | False |
| 10757968 | OROTPDECARB-RXN                                                                 | 28    | []         | 64.33 | OROTPDECARB-CPLX[c]                 | ['OROTIDINE-5-PHOSPHATE[c]']                | []                                          |        | False |
| 8422384  | OXALOACETATE-TAUTOMERASE-RXN (reverse)                                          | 300   | []         | 689.2 | FUMARASE-A[c]                       | ['ENOL-OXALOACETATE[c]']                    | []                                          |        | False |
| 20553497 | OXALYL-COA-DECARBOXYLASE-RXN                                                    | 60.7  | []         | 98.61 | CPLX0-7878[c]                       | ['OXALYL-COA[c]']                           | []                                          | 30     | False |
| 20170126 | PABASYN-RXN_PABASYN-CPLX (reverse)                                              | 0.67  | [520]      | 1.539 | PABASYN-CPLX[c]                     | ['GLN[c]']                                  | ['GLN[c]']                                  | 25     | False |
| 14982443 | PABASYN-RXN_PABSYNMULTI-CPLX (reverse)                                          | 0.53  | [13]       | 1.218 | PABSYNMULTI-CPLX[c]                 | ['CHORISMATE[c]']                           | ['CHORISMATE[c]']                           | 25     | False |
| 16990935 | PANTOATE-BETA-ALANINE-LIG-RXN                                                   | 1.4   | [1750]     | 3.216 | PANTOATE-BETA-ALANINE-LIG-CPLX[c]   | ['ATP[c]']                                  | ['ATP[c]']                                  | 25     | False |
| 19307712 | PANTOTHENATE-KIN-RXN                                                            | 1.14  | [115]      | 3.704 | PANTOTHENATE-KIN-CPLX[c]            | ['ATP[c]']                                  | ['ATP[c]']                                  | 20     | False |
| 9927652  | PEPCARBOX-RXN                                                                   | 150   | [190]      | 243.7 | PEPCARBOX-CPLX[c]                   | ['PHOSPHO-ENOL-PYRUVATE[c]']                | ['PHOSPHO-ENOL-PYRUVATE[c]']                | 30     | False |
| 8550422  | PGLYCDEHYDROG-RXN                                                               | 27.8  | []         | 27.8  | PGLYCDEHYDROG-CPLX[c]               | ['3-P-HYDROXYPYRUVATE[c]']                  | []                                          | 37     | False |
| 11736651 | PHEAMINOTRANS-RXN_ASPAMINOTRANS-DIMER                                           | 13.73 | [8000]     | 5.576 | ASPAMINOTRANS-DIMER[c]              | ['PHE[c]']                                  | ['PHE[c]']                                  | 50     | False |
| 22138634 | PHEAMINOTRANS-RXN_ASPAMINOTRANS-DIMER (reverse)                                 | 670   | [37000]    | 1539  | ASPAMINOTRANS-DIMER[c]              | ['GLT[c]']                                  | ['GLT[c]']                                  | 25     | False |
| 10989422 | PHEAMINOTRANS-RXN_BRANCHED-CHAINAMINOTRANSFER-CPLX                              | 2.9   | [890, 260] | 6.662 | BRANCHED-CHAINAMINOTRANSFER-CPLX[c] | ['PHE[c]', 'KETOGLUTARATE[c]']              | '2- ['PHE[c]', 'KETOGLUTARATE[c]']          | '2- 25 | False |



|          |                                                                                                   |       |                  |       |                                      |                                             |                            |    |  |       |
|----------|---------------------------------------------------------------------------------------------------|-------|------------------|-------|--------------------------------------|---------------------------------------------|----------------------------|----|--|-------|
| 16731973 | PHENDEHYD-RXN (reverse)                                                                           | 96.83 | []               | 222.5 | PHENDEHYD-CPLX[c]                    | ['PHENYLACETALDEHYDE[c]']                   | []                         |    |  | False |
| 20160120 | PHENYLALANINE-<br>TRNA-LIGASE-RXN-PHE-<br>tRNAs/PHE/ATP/PROTON//Charged-<br>PHE-tRNAs/AMP/PPI.52. | 199   | [2]              | 199   | PHES-CPLX[c]                         | ['PHE[c]']                                  | ['PHE[c]']                 | 37 |  | True  |
| 21046341 | PHOSACETYLTRANS-<br>RXN_CPLX0-7912                                                                | 119.8 | [9.5]            | 194.6 | CPLX0-7912[c]                        | ['ACETYL-COA[c]']                           | ['ACETYL-COA[c]']          | 30 |  | False |
| 21046341 | PHOSACETYLTRANS-<br>RXN_CPLX0-7912 (reverse)                                                      | 415.5 | [311.7,<br>32.7] | 675   | CPLX0-7912[c]                        | ['ACETYL-P[c]', 'CO-A[c]']                  | ['ACETYL-P[c]', 'CO-A[c]'] | 30 |  | False |
| 21046341 | PHOSACETYLTRANS-<br>RXN_PHOSACETYLTRANS-<br>CPLX (reverse)                                        | 227.6 | [900,<br>67.2]   | 369.7 | PHOSACETYLTRANS-<br>CPLX[c]          | ['ACETYL-P[c]', 'CO-A[c]']                  | ['ACETYL-P[c]', 'CO-A[c]'] | 30 |  | False |
| 21046341 | PHOSACETYLTRANS-<br>RXN_PHOSACETYLTRANS-<br>CPLX                                                  | 29.6  | [44.9]           | 48.09 | PHOSACETYLTRANS-<br>CPLX[c]          | ['ACETYL-COA[c]']                           | ['ACETYL-COA[c]']          | 30 |  | False |
| 7696318  | PMPOXI-RXN                                                                                        | 28    | []               | 19.8  | PDXH-CPLX[c]                         | ['PYRIDOXAMINE-5P[c]']                      | []                         | 42 |  | False |
| 7860596  | PNPOXI-RXN                                                                                        | 0.76  | []               | 0.76  | PDXH-CPLX[c]                         | ['PYRIDOXINE-5P[c]']                        | []                         | 37 |  | False |
| 8394006  | PPPGPPHYDRO-RXN                                                                                   | 0.023 | []               | 0.023 | PPPGPPHYDRO-CPLX[c]                  | ['GDP-TP[c]']                               | []                         | 37 |  | False |
| 7727400  | PRAISOM-RXN                                                                                       | 40    | []               | 91.9  | PRAI-IGPS[c]                         | ['N-5-PHOSPHORIBOSYL-<br>ANTHRANILATE[c]']  | []                         | 25 |  | False |
| 10769128 | PREPHENATEDEHYDRAT-<br>RXN                                                                        | 32.2  | []               | 32.2  | CHORISMUTPREPHENDEHYDRAT-<br>CPLX[c] | ['PREPHENATE[c]']                           | []                         | 37 |  | False |
| 6395895  | PREPHENATEDEHYDROG-<br>RXN                                                                        | 135   | [130]            | 135   | CHORISMUTPREPHENDEHYDROG-<br>CPLX[c] | ['PREPHENATE[c]', 'NAD[c]']                 | ['NAD[c]']                 | 37 |  | False |
| 12356303 | PRIBFAICARPISOM-RXN                                                                               | 14.3  | []               | 14.3  | PRIBFAICARPISOM-<br>MONOMER[c]       | ['PHOSPHORIBOSYL-<br>FORMIMINO-AICAR-P[c]'] | []                         | 37 |  | False |
| 16864571 | PROLINE-TRNA-<br>LIGASE-RXN-PRO-<br>tRNAs/PRO/ATP/PROTON//Charged-<br>PRO-tRNAs/AMP/PPI.52.       | 70    | [250]            | 70    | PROS-CPLX[c]                         | ['PRO[c]']                                  | ['PRO[c]']                 | 37 |  | True  |
| 19583219 | PROTOPORGENOXI-RXN                                                                                | 0.292 | []               | 0.292 | CPLX0-7811[c]                        | ['PROTOPORPHYRINOGEN[c]']                   | []                         | 37 |  | False |
| 2651124  | PRTRANS-<br>RXN_ANTHRANSYN-CPLX                                                                   | 4.4   | [0.28]           | 10.11 | ANTHRANSYN-CPLX[c]                   | ['ANTHRANILATE[c]']                         | ['ANTHRANILATE[c]']        | 25 |  | False |
| 8706854  | PSERTRANSAM-RXN (reverse)                                                                         | 0.39  | []               | 0.39  | PSERTRANSAM-CPLX[c]                  | ['3-P-SERINE[c]']                           | []                         | 37 |  | False |
| 8706854  | PSERTRANSAM-RXN                                                                                   | 1.75  | []               | 1.75  | PSERTRANSAM-CPLX[c]                  | ['3-P-<br>HYDROXYPYRUVATE[c]']              | []                         | 37 |  | False |
| 8706854  | PSERTRANSAMPYR-RXN (re-<br>verse)                                                                 | 0.15  | []               | 0.15  | PSERTRANSAM-CPLX[c]                  | ['4-PHOSPHONOOXY-<br>THREONINE[c]']         | []                         | 37 |  | False |
| 15249053 | PYRAMKIN-RXN                                                                                      | 0.67  | []               | 0.67  | PDXK-CPLX[c]                         | ['PYRIDOXAMINE[c]']                         | []                         | 37 |  | False |
| 15249053 | PYRIDOXKIN-RXN_PDXX-<br>CPLX                                                                      | 2.33  | []               | 2.33  | PDXK-CPLX[c]                         | ['PYRIDOXAL[c]']                            | []                         | 37 |  | False |

|                                                                                                                                                                                                                                                                                                                                                                                                                                                                             |                                                                      |      |         |        |                       |                                    |            |    |       |
|-----------------------------------------------------------------------------------------------------------------------------------------------------------------------------------------------------------------------------------------------------------------------------------------------------------------------------------------------------------------------------------------------------------------------------------------------------------------------------|----------------------------------------------------------------------|------|---------|--------|-----------------------|------------------------------------|------------|----|-------|
| Reddick, J.J.;<br>Kinsland, C.;<br>Nicewonger, R.;<br>Christian, T.;<br>Downs, D.M.;<br>Winkler, M.E.;<br>Begley, T.P.<br>Overexpression,<br>purification and<br>characterization<br>of two pyrim-<br>idine kinases<br>involved in the<br>biosynthesis<br>of thiamin:<br>4-amino-5-<br>hydroxymethyl-<br>2-<br>methylpyrimidine<br>kinase and<br>4-amino-5-<br>hydroxymethyl-<br>2-<br>methylpyrimidine<br>phosphate ki-<br>nase Tetra-<br>hedron 54<br>15983-15991<br>1998 | PYRIMSYN3-RXN                                                        | 0.07 | [193.0] | 0.1608 | HMP-P-KIN-CPLX[c]     | ['ATP[c]']                         | ['ATP[c]'] | 25 | False |
| 16829675                                                                                                                                                                                                                                                                                                                                                                                                                                                                    | R601-RXN-FUM/REDUCED-<br>MENAQUINONE//SUC/CPD-<br>9728.38. (reverse) | 15   | []      | 24.37  | FUMARATE-REDUCTASE[i] | ['SUC[c]']                         | []         | 30 | False |
| 16829675                                                                                                                                                                                                                                                                                                                                                                                                                                                                    | R601-RXN-FUM/REDUCED-<br>MENAQUINONE//SUC/CPD-<br>9728.38.           | 230  | [4]     | 373.6  | FUMARATE-REDUCTASE[i] | ['FUM[c]']                         | ['FUM[c]'] | 30 | False |
| 15271350                                                                                                                                                                                                                                                                                                                                                                                                                                                                    | RFFTRANS-RXN                                                         | 0.38 | []      | 0.873  | CPLX0-7990[c]         | ['DTDP-DEOH-DEOXY-<br>GLUCOSE[c]'] | []         | 25 | False |
| Chiu, T.H.;<br>Evans, K.L.;<br>Feingold, D.S.<br>L-Rhamnulose-<br>1-phosphate<br>aldolase Meth-<br>ods Enzymol.<br>42C 264-269<br>1975                                                                                                                                                                                                                                                                                                                                      | RHAMNULPALDOL-RXN                                                    | 38.3 | []      | 38.3   | RHAMNULPALDOL-CPLX[c] | ['RHAMNULOSE-1P[c]']               | []         | 37 | False |

|          |                                                                                             |         |         |         |                                      |                                              |                               |    |       |
|----------|---------------------------------------------------------------------------------------------|---------|---------|---------|--------------------------------------|----------------------------------------------|-------------------------------|----|-------|
| 18085797 | RHAMNULPALDOL-RXN (reverse)                                                                 | 9.1     | []      | 9.1     | RHAMNULPALDOL-CPLX[c]                | ['DIHYDROXY-ACETONE-PHOSPHATE[c]']           | []                            | 37 | False |
| 12517338 | RIB5PISOM-RXN_RIB5PISOMA-CPLX                                                               | 2100    | []      | 2100    | RIB5PISOMA-CPLX[c]                   | ['RIBOSE-5P[c]']                             | []                            | 37 | False |
| 15843156 | RIBOFLAVIN-SYN-RXN                                                                          | 0.267   | []      | 0.6134  | CPLX0-3952[c]                        | ['DIMETHYL-D-RIBITYL-LUMAZINE[c]']           | []                            | 25 | False |
| 19099445 | RIBOSYLHOMOCYSTEINASE-RXN                                                                   | 0.38    | []      | 0.873   | EG12712-MONOMER[c]                   | ['CPD-564[c]']                               | []                            | 25 | False |
| 9548961  | RIBULPEPIM-RXN_RIBULPEPIM-CPLX                                                              | 20.4    | []      | 20.4    | RIBULPEPIM-CPLX[c]                   | ['L-RIBULOSE-5-P[c]']                        | []                            | 37 | False |
| 17176045 | RXN-10856                                                                                   | 0.089   | []      | 0.2045  | CPLX0-3936[c]                        | ['CPD-11770[c]']                             | []                            | 25 | False |
| 10642176 | RXN-11484-Pimeloyl-ACPs/L-ALPHA-ALANINE/PROTON//8-AMINO-7-OXONANOATE/CARBON-DIOXIDE/ACP.80. | 0.06    | [500]   | 0.09747 | 7KAPSYN-CPLX[c]                      | ['Pimeloyl-ACPs[c]', 'L-ALPHA-ALANINE[c]']   | ['L-ALPHA-ALANINE[c]']        | 30 | False |
| 13785427 | RXN-11496-PYRUVATE/UBIQUINONE-8/WATER//CARBON-DIOXIDE/ACET/CPD-9956.58.                     | 167     | []      | 383.7   | PYRUVOXID-CPLX[i]                    | ['PYRUVATE[c]']                              | []                            |    | False |
| 17542990 | RXN-11832                                                                                   | 103     | [0.035] | 167.3   | CMPKI-MONOMER[c]                     | ['CMP[c]']                                   | ['CMP[c]']                    | 30 | False |
| 10529181 | RXN-11839                                                                                   | 0.12    | []      | 0.12    | EG11177-MONOMER[c]                   | ['tRNA-uridine55[c]']                        | []                            | 37 | False |
| 19664587 | RXN-11841 (reverse)                                                                         | 0.00097 | []      | 0.00097 | G7422-MONOMER[c]                     | ['tRNA-uridine13[c]']                        | []                            | 37 | False |
| 20452364 | RXN-12458                                                                                   | 0.09    | []      | 0.09    | CPLX0-3950[c]                        | ['Guanine37-in-tRNA[c]']                     | []                            | 37 | False |
| 17635929 | RXN-12583_E1P-CPLX (reverse)                                                                | 37.9    | [4.62]  | 61.57   | E1P-CPLX[c]                          | ['PYRUVATE[c]', 'THIAMINE-PYROPHOSPHATE[c]'] | ['THIAMINE-PYROPHOSPHATE[c]'] | 30 | False |
| 11342129 | RXN-13990 (reverse)                                                                         | 0.0121  | []      | 0.0278  | KDPGALDOL-4OH2OXOGLUTARALDOL-CPLX[c] | ['PYRUVATE[c]']                              | []                            |    | False |
| 18083802 | RXN-14073_GLYCPDIESTER-CYTO-MONOMER                                                         | 3.3     | []      | 3.791   | GLYCPDIESTER-CYTO-MONOMER[c]         | ['GLYCEROPHOSPHOGLYCEROL[ $\beta$ ]']        |                               | 35 | False |
| 18083802 | RXN-14136                                                                                   | 2.8     | []      | 3.216   | GLYCPDIESTER-CYTO-MONOMER[c]         | ['CPD0-2030[c]']                             | []                            | 35 | False |
| 24210219 | RXN-14139_CPLX0-8106                                                                        | 15.2    | [69.1]  | 15.2    | CPLX0-8106[c]                        | ['UTP[c]']                                   | ['UTP[c]']                    | 37 | False |
| 15489502 | RXN-14142[CCO-CYTOSOL]-DGMP/WATER//DEOXYGUANOSINE/Pi.43...EG11817-MONOMER                   | 8.04    | [280]   | 8.04    | EG11817-MONOMER[c]                   | ['DGMP[c]']                                  | ['DGMP[c]']                   | 37 | False |
| 16297670 | RXN-14142[CCO-PERI-BAC]-DGMP/WATER//DEOXYGUANOSINE/Pi.44...APHA-CPLX                        | 15      | [3.0]   | 15      | APHA-CPLX[p]                         | ['DGMP[p]']                                  | ['DGMP[c]']                   | 37 | False |
| 15489502 | RXN-14143_CPLX0-7625                                                                        | 0.23    | []      | 0.23    | CPLX0-7625[c]                        | ['DUMP[c]']                                  | []                            | 37 | False |
| 18083802 | RXN-14160                                                                                   | 1.1     | []      | 1.264   | GLYCPDIESTER-CYTO-MONOMER[c]         | ['L-1-GLYCEROPHOSPHORYLETHANOL-AMINE[c]']    | []                            | 35 | False |

|                                                                                                                                                                                                                                                                                       |                                                                                          |              |        |        |                                  |                               |                    |    |       |
|---------------------------------------------------------------------------------------------------------------------------------------------------------------------------------------------------------------------------------------------------------------------------------------|------------------------------------------------------------------------------------------|--------------|--------|--------|----------------------------------|-------------------------------|--------------------|----|-------|
| 15489502                                                                                                                                                                                                                                                                              | RXN-14161[CCO-CYTOSOL]-DAMP/WATER//DEOXYADENOSINE/Pi.43...CPLX0-7625                     | 0.3          | [12]   | 0.3    | CPLX0-7625[c]                    | ['DAMP[c]']                   | ['DAMP[c]']        | 37 | False |
| 12383057                                                                                                                                                                                                                                                                              | RXN-14325                                                                                | 9.4          | []     | 9.4    | CTPSYN-CPLX[c]                   | ['AMMONIUM[c]']               | []                 | 37 | False |
| 15498577                                                                                                                                                                                                                                                                              | RXN-15125...CPLX0-7622                                                                   | 544          | [4800] | 544    | CPLX0-7622[c]                    | ['SER[c]']                    | ['SER[c]']         | 37 | False |
| 19370061                                                                                                                                                                                                                                                                              | RXN-15131...CYSTATHIONINE-BETA-LYASE-CPLX                                                | 35           | []     | 80.41  | CYSTATHIONINE-BETA-LYASE-CPLX[c] | ['L-CYSTATHIONINE[c]']        | []                 | 25 | False |
| 12711733                                                                                                                                                                                                                                                                              | RXN-15313 (reverse)                                                                      | 7.7          | []     | 17.69  | ACNEULY-CPLX[c]                  | ['CPD0-1123[c]']              | []                 | 25 | False |
| 21081107                                                                                                                                                                                                                                                                              | RXN-15578                                                                                | 6.8          | [227]  | 15.62  | TRYPTOPHAN-CPLX[c]               | ['TRP[c]']                    | ['TRP[c]']         | 25 | False |
| 16221850                                                                                                                                                                                                                                                                              | RXN-15581                                                                                | 15.7         | []     | 36.07  | DSERDEAM-MONOMER[c]              | ['D-SERINE[c]']               | []                 |    | False |
| 24509771                                                                                                                                                                                                                                                                              | RXN-15607                                                                                | 0.0517       | []     | 0.0517 | KDUD-MONOMER[c]                  | ['11-DEOXYCORTICOSTERONE[c]'] | []                 | 37 | False |
| 24509771                                                                                                                                                                                                                                                                              | RXN-15607                                                                                | 0.283        | [37]   | 0.283  | KDUD-MONOMER[c]                  | ['NADH[c]']                   | ['NADH[c]']        | 37 | False |
| 6792201                                                                                                                                                                                                                                                                               | RXN-15740-GLYCEROL-3P/CPD-9728//DIHYDROXY-ACETONE-PHOSPHATE/REDUCED-MENAQUINONE.70.      | 33.3         | [339]  | 76.5   | ANGLYC3PDEHYDROG-CPLX[i]         | ['GLYCEROL-3P[c]']            | ['GLYCEROL-3P[c]'] | 25 | False |
| 25225400                                                                                                                                                                                                                                                                              | RXN-15943                                                                                | 127.6        | []     | 293.1  | CPLX0-7820[c]                    | ['CO-A[c]']                   | []                 |    | False |
| 12535615                                                                                                                                                                                                                                                                              | RXN-16000 (reverse)                                                                      | 5.76         | []     | 9.357  | CPLX0-1962[c]                    | ['L-ALLO-THREONINE[c]']       | []                 | 30 | False |
| Kiick, K.L.;<br>Tirrell, D.A.<br>Protein En-<br>gineering by<br>In Vivo In-<br>corporation of<br>Non-Natural<br>Amino Acids:<br>Control of In-<br>corporation<br>of Methionine<br>Analogues by<br>Methionyl-<br>tRNA Syn-<br>thetase Tetra-<br>hedron 56<br>9487-9493 2000<br>9607323 | RXN-16165-Initiation-tRNAmet/MET/ATP/PROTON//L-methionyl-tRNAfmet/AMP/PPI.64. (re-verse) | 13.3         | [24.3] | 30.56  | METG-CPLX[c]                     | ['MET[c]']                    | ['MET[c]']         | 25 | False |
|                                                                                                                                                                                                                                                                                       | RXN-16165-Initiation-tRNAmet/MET/ATP/PROTON//L-methionyl-tRNAfmet/AMP/PPI.64. (re-verse) | 6.85         | []     | 6.85   | METG-CPLX[c]                     | ['Initiation-tRNAmet[c]']     | []                 | 37 | False |
| 16039592                                                                                                                                                                                                                                                                              | RXN-1961                                                                                 | 0.0153       | [220]  | 0.0153 | G6096-MONOMER[c]                 | ['ATP[c]']                    | ['ATP[c]']         | 37 | False |
| 16039592                                                                                                                                                                                                                                                                              | RXN-1961                                                                                 | 0.0702       | [380]  | 0.0702 | G6096-MONOMER[c]                 | ['LYS[c]']                    | ['LYS[c]']         | 37 | False |
| 11515538                                                                                                                                                                                                                                                                              | RXN-6622...CPLX0-8122                                                                    | 178.333333[] |        | 178.3  | CPLX0-8122[c]                    | ['CYS-GLY[c]']                | []                 | 37 | False |

|          |                                                                                                          |        |                 |        |                                 |                                                    |                              |    |       |
|----------|----------------------------------------------------------------------------------------------------------|--------|-----------------|--------|---------------------------------|----------------------------------------------------|------------------------------|----|-------|
| 16990279 | RXN-7607[CCO-CYTOSOL]-<br>IMP/WATER//INOSINE/Pi.35...G7742-<br>MONOMER                                   | 2.6    | []              | 5.973  | G7742-MONOMER[c]                | ['IMP[c]']                                         | []                           |    | False |
| 16990279 | RXN-7609[CCO-CYTOSOL]-<br>GMP/WATER//GUANOSINE/Pi.37...G7742-<br>MONOMER                                 | 5.5    | [1900]          | 12.64  | G7742-MONOMER[c]                | ['GMP[c]']                                         | ['GMP[c]']                   |    | False |
| 16297670 | RXN-7609[CCO-PERI-BAC]-<br>GMP/WATER//GUANOSINE/Pi.38...APHA-<br>CPLX                                    | 65     | []              | 65     | APHA-CPLX[p]                    | ['GMP[p]']                                         | []                           | 37 | False |
| 16990279 | RXN-7609[CCO-PERI-BAC]-<br>GMP/WATER//GUANOSINE/Pi.38...G7742-<br>MONOMER                                | 5.5    | []              | 12.64  | G7742-MONOMER[c]                | ['GMP[p]']                                         | []                           |    | False |
| 17542990 | RXN-7913                                                                                                 | 108    | []              | 175.4  | CMPKI-MONOMER[c]                | ['DCMP[c]']                                        | []                           | 30 | False |
| 12637497 | RXN-7967-<br>QUINATE/NAD//DEHYDROQUINATE/NADH/PROTON.40.<br>(reverse)                                    | 0.05   | [116]           | 0.1625 | CPLX0-7462[c]                   | ['QUINATE[c]', 'NAD[c]']                           | ['NAD[c]']                   | 20 | False |
| 12637497 | RXN-7967-<br>QUINATE/NADP//DEHYDROQUINATE/NADPH/PROTON.42.<br>(reverse)                                  | 0.05   | [500]           | 0.1625 | CPLX0-7462[c]                   | ['QUINATE[c]', 'NADP[c]']                          | ['NADP[c]']                  | 20 | False |
| 23018273 | RXN-8667                                                                                                 | 83     | []              | 219    | HYDROPEROXIDI-CPLX[c]           | ['HYDROGEN-PEROXIDE[c]']                           | []                           | 23 | False |
| 22471615 | RXN-8992                                                                                                 | 2      | []              | 4.595  | CPLX0-7426[c]                   | ['FARNESYL-PP[c]', 'DELTA3-<br>ISOPENTENYL-PP[c]'] | []                           | 25 | False |
| 21704016 | RXN-8999                                                                                                 | 2.5    | []              | 5.743  | UPPSYN-CPLX[c]                  | ['FARNESYL-PP[c]', 'DELTA3-<br>ISOPENTENYL-PP[c]'] | []                           | 25 | False |
| 18284213 | RXN-9310                                                                                                 | 167    | []              | 167    | EG12438-MONOMER[c]              | ['CPD-9924[c]']                                    | []                           | 37 | False |
| 23564174 | RXN-9311                                                                                                 | 6.2    | []              | 14.24  | CPLX0-8128[c]                   | ['CPD-9925[c]']                                    | []                           | 25 | False |
| 22017312 | RXN-9535-Dodecanoyl-<br>ACPs/MALONYL-<br>ACP/PROTON//3-oxo-<br>myristoyl-ACPs/CARBON-<br>DIOXIDE/ACP.76. | 0.0567 | []              | 0.1303 | FABB-CPLX[c]                    | ['Dodecanoyl-ACPs[c]']                             | []                           | 25 | False |
| 22017312 | RXN-9535-Dodecanoyl-<br>ACPs/MALONYL-<br>ACP/PROTON//3-oxo-<br>myristoyl-ACPs/CARBON-<br>DIOXIDE/ACP.76. | 0.11   | []              | 0.2527 | FABB-CPLX[c]                    | ['MALONYL-ACP[c]']                                 | []                           | 25 | False |
| 8706750  | RXN-9772                                                                                                 | 5.55   | [2700,<br>2500] | 12.75  | L-ASPARTATE-OXID-<br>MONOMER[c] | ['L-ASPARTATE[c]', 'FUM[c]']                       | ['L-ASPARTATE[c]', 'FUM[c]'] | 25 | False |
| 10542272 | RXN0-1441                                                                                                | 117.3  | []              | 117.3  | CPLX0-3721[c]                   | ['ADENOSINE_DIPHOSPHATE_RIBOSE[c]']                |                              | 37 | False |
| 12975365 | RXN0-1461                                                                                                | 0.003  | []              | 0.003  | CPLX0-7808[c]                   | ['COPROPORPHYRINOGEN_III[c]']                      |                              | 37 | False |
| 11934293 | RXN0-1941 (reverse)                                                                                      | 2.6    | []              | 4.224  | MONOMER0-148[c]                 | ['ETHYL-2-<br>METHYLACETOACETATE[c]']              | []                           | 30 | False |
| 12535615 | RXN0-2201 (reverse)                                                                                      | 4.2    | [40000,<br>540] | 6.823  | CPLX0-1962[c]                   | ['SER[c]', 'NADP[c]']                              | ['SER[c]', 'NADP[c]']        | 30 | False |
| 10769117 | RXN0-268 (reverse)                                                                                       | 0.72   | [7.1]           | 1.654  | G7517-MONOMER[c]                | ['PROPIONYL-COA[c]']                               | ['PROPIONYL-COA[c]']         | 25 | False |
| 11237876 | RXN0-300_CPLX0-235                                                                                       | 72.5   | []              | 166.6  | CPLX0-235[i]                    | ['OH-PYR[c]']                                      | []                           | 25 | False |
| 11237876 | RXN0-300_G6539-MONOMER                                                                                   | 11.8   | []              | 27.11  | G6539-MONOMER[c]                | ['OH-PYR[c]']                                      | []                           | 25 | False |

|          |                                                                         |       |         |       |                                          |                                                 |             |    |       |
|----------|-------------------------------------------------------------------------|-------|---------|-------|------------------------------------------|-------------------------------------------------|-------------|----|-------|
| 20480490 | RXN0-302                                                                | 2.7   | []      | 6.203 | CPLX0-721[c]                             | ['2-PHOSPHO-4-CYTIDINE-5-DIPHOSPHO-2-C-MET[c]'] | []          |    | False |
| 10769117 | RXN0-310                                                                | 1.6   | []      | 1.6   | CPLX0-254[c]                             | ['METHYL-MALONYL-COA[c]']                       | []          | 37 | False |
| 1906883  | RXN0-3281                                                               | 2833  | []      | 6976  | FORMATEDEHYDROGH-MONOMER[c]              | ['FORMATE[c]']                                  | []          | 24 | False |
| 18353368 | RXN0-3741[CCO-CYTOSOL]-DAMP/WATER//DEOXYADENOSINE/Pi.43...G7230-MONOMER | 2.28  | [118.9] | 2.28  | G7230-MONOMER[c]                         | ['DAMP[c]']                                     | ['DAMP[c]'] | 37 | False |
| 18353368 | RXN0-3741[CCO-CYTOSOL]-DCMP/WATER//DEOXYCYTIDINE/Pi.42...G7230-MONOMER  | 0.84  | []      | 0.84  | G7230-MONOMER[c]                         | ['DCMP[c]']                                     | []          | 37 | False |
| 15489502 | RXN0-3741[CCO-CYTOSOL]-DIMP/WATER//DEOXYINOSINE/Pi.41...CPLX0-7625      | 0.24  | []      | 0.24  | CPLX0-7625[c]                            | ['DIMP[c]']                                     | []          | 37 | False |
| 18353368 | RXN0-3741[CCO-CYTOSOL]-DIMP/WATER//DEOXYINOSINE/Pi.41...G7230-MONOMER   | 0.61  | []      | 0.61  | G7230-MONOMER[c]                         | ['DIMP[c]']                                     | []          | 37 | False |
| 18353368 | RXN0-3741[CCO-CYTOSOL]-DUMP/WATER//DEOXYURIDINE/Pi.41...G7230-MONOMER   | 1.36  | []      | 1.36  | G7230-MONOMER[c]                         | ['DUMP[c]']                                     | []          | 37 | False |
| 15489502 | RXN0-3741[CCO-CYTOSOL]-TMP/WATER//THYMIDINE/Pi.37...CPLX0-7625          | 0.16  | []      | 0.16  | CPLX0-7625[c]                            | ['TMP[c]']                                      | []          | 37 | False |
| 18353368 | RXN0-3741[CCO-CYTOSOL]-TMP/WATER//THYMIDINE/Pi.37...G7230-MONOMER       | 1.19  | []      | 1.19  | G7230-MONOMER[c]                         | ['TMP[c]']                                      | []          | 37 | False |
| 17698004 | RXN0-384_H2NEOPTERINP3PYROPHOSPHOHYDRO-MONOMER                          | 4.59  | [790]   | 4.59  | H2NEOPTERINP3PYROPHOSPHOHYDRO-MONOMER[c] | ['DATP[c]']                                     | ['DATP[c]'] | 37 | False |
| 16077126 | RXN0-4281_G6967-MONOMER                                                 | 2.85  | []      | 6.548 | G6967-MONOMER[c]                         | ['METHYL-GLYOXAL[c]']                           | []          | 25 | False |
| 16077126 | RXN0-4281_G7558-MONOMER                                                 | 11    | []      | 25.27 | G7558-MONOMER[c]                         | ['METHYL-GLYOXAL[c]']                           | []          | 25 | False |
| 16077126 | RXN0-4281_MONOMER0-148                                                  | 27.62 | []      | 63.45 | MONOMER0-148[c]                          | ['METHYL-GLYOXAL[c]']                           | []          | 25 | False |
| 16077126 | RXN0-4281_MONOMER0-149                                                  | 29.15 | []      | 66.97 | MONOMER0-149[c]                          | ['METHYL-GLYOXAL[c]']                           | []          | 25 | False |
| 18056714 | RXN0-4301                                                               | 0.44  | []      | 1.011 | CPLX0-7660[c]                            | ['D-SEDOHEPTULOSE-7-P[c]']                      | []          | 25 | False |
| 20050615 | RXN0-4361                                                               | 35.7  | []      | 82.02 | EG11736-MONOMER[c]                       | ['D-BETA-D-HEPTOSE-17-DIPHOSPHATE[c]']          | []          | 25 | False |
| 18837509 | RXN0-4641-CPD0-881/WATER//CPD-16168/D-LACTATE.36.                       | 5.7   | []      | 9.26  | CPLX0-7732[c]                            | ['CPD0-881[c]']                                 | []          | 30 | False |
| 16464851 | RXN0-5065 (reverse)                                                     | 100   | []      | 229.7 | CPLX0-3941[c]                            | ['34-DIHYDROXYPHENYLACETYL-COA[c]']             | []          | 25 | False |
| 24210219 | RXN0-5107_CPLX0-8106                                                    | 15.4  | []      | 15.4  | CPLX0-8106[c]                            | ['TTP[c]']                                      | []          | 37 | False |

|          |                                                                                                |          |         |          |                        |                                     |                  |    |       |
|----------|------------------------------------------------------------------------------------------------|----------|---------|----------|------------------------|-------------------------------------|------------------|----|-------|
| 16766526 | RXN0-5108                                                                                      | 75       | []      | 75       | CPLX0-3971[c]          | ['GDP-MANNOSE[c]']                  | []               | 37 | False |
| 16990279 | RXN0-5114[CCO-CYTOSOL]-3-P-SERINE/WATER//SER/Pi.38.                                            | 66       | []      | 151.6    | PSERPHOSPHA-MONOMER[c] | ['3-P-SERINE[c]']                   | []               |    | False |
| 11747300 | RXN0-5116                                                                                      | 80       | [20]    | 226.3    | RIBULOKIN-CPLX[c]      | ['L-RIBULOSE[c]', 'ATP[c]']         | ['ATP[c]']       | 22 | False |
| 22059588 | RXN0-5118                                                                                      | 4.7      | []      | 4.7      | EG11189-MONOMER[c]     | ['KDO2-LIPID-A[c]']                 | []               | 37 | False |
| 24479701 | RXN0-5120                                                                                      | 0.5      | [162]   | 1.149    | EG11339-MONOMER[c]     | ['CPD-12575[c]', 'CPD0-930[c]']     | ['CPD-12575[c]'] | 25 | False |
| 16813561 | RXN0-5141 (reverse)                                                                            | 50.8     | [100]   | 116.7    | MONOMER0-149[c]        | ['NADPH[c]']                        | ['NADPH[c]']     | 25 | False |
| 16990279 | RXN0-5187[CCO-CYTOSOL]-FMN/WATER//RIBOFLAVIN/Pi.38...EG11202-MONOMER                           | 9.4      | []      | 21.6     | EG11202-MONOMER[c]     | ['FMN[c]']                          | []               |    | False |
| 24123841 | RXN0-5187[CCO-CYTOSOL]-FMN/WATER//RIBOFLAVIN/Pi.38...G6442-MONOMER                             | 0.6      | []      | 0.6      | G6442-MONOMER[c]       | ['FMN[c]']                          | []               | 37 | False |
| 16813561 | RXN0-5213 (reverse)                                                                            | 5.6      | [52]    | 12.87    | G6958-MONOMER[c]       | ['NADH[c]']                         | ['NADH[c]']      | 25 | False |
| 11747447 | RXN0-5228 (reverse)                                                                            | 10       | []      | 16.25    | G6661-MONOMER[c]       | ['CPD0-2190[c]']                    | []               | 30 | False |
| 19883126 | RXN0-5234 (reverse)                                                                            | 0.5      | []      | 0.8123   | GLYOHMETRANS-CPLX[c]   | ['ALLO-THR[c]']                     | []               | 30 | False |
| 21059411 | RXN0-5240 (reverse)                                                                            | 0.000633 | []      | 0.000633 | GLYOHMETRANS-CPLX[c]   | ['D-ALANINE[c]']                    | []               | 37 | False |
| 15489502 | RXN0-5292[CCO-CYTOSOL]-DCMP/WATER//DEOXYCYTIDINE/Pi.42...CPLX0-7625                            | 0.23     | []      | 0.23     | CPLX0-7625[c]          | ['DCMP[c]']                         | []               | 37 | False |
| 18390652 | RXN0-5364                                                                                      | 0.08     | []      | 0.1838   | EG12387-MONOMER[c]     | ['CPD-381[c]']                      | []               |    | False |
| 16672604 | RXN0-5387                                                                                      | 370      | []      | 370      | G7868-MONOMER[c]       | ['CPD0-1156[c]']                    | []               | 37 | False |
| 16672604 | RXN0-5387                                                                                      | 6        | [170]   | 6        | G7868-MONOMER[c]       | ['NADPH[c]']                        | ['NADPH[c]']     | 37 | False |
| 18576672 | RXN0-5390                                                                                      | 23.7     | []      | 54.45    | G6244-MONOMER[c]       | ['CPD0-1158[c]']                    | []               |    | False |
| 18754693 | RXN0-5433                                                                                      | 0.4      | []      | 0.919    | CPLX0-7723[c]          | ['DEHYDRO-3-DEOXY-L-RHAMNONATE[c]'] | []               | 25 | False |
| 10828971 | RXN0-6274                                                                                      | 1.26     | []      | 1.26     | EG10595-MONOMER[c]     | ['CPD-4211[c]']                     | []               | 37 | False |
| 21119630 | RXN0-6562                                                                                      | 5.7      | []      | 5.7      | EG12693-MONOMER[c]     | ['3-P-HYDROXYPYRUVATE[c]']          | []               | 37 | False |
| 21119630 | RXN0-6564                                                                                      | 9.7      | []      | 22.28    | HOMOSERKIN-CPLX[c]     | ['CPD0-2189[c]']                    | []               | 25 | False |
| 21169495 | RXN0-6565                                                                                      | 0.28     | []      | 0.4549   | CPLX0-7788[c]          | ['DIHYDRO-THYMINE[c]']              | []               | 30 | False |
| 21169495 | RXN0-6565 (reverse)                                                                            | 0.39     | []      | 0.6336   | CPLX0-7788[c]          | ['THYMINE[c]']                      | []               | 30 | False |
| 19140736 | RXN0-7008-PRO/UBIQUINONE-8//L-DELTA1-PYRROLINE_5-CARBOXYLATE/CPD-9956/PROTON.67...PUTA-CPLXBND | 29       | [59000] | 66.62    | PUTA-CPLXBND[c]        | ['PRO[c]']                          | ['PRO[c]']       | 25 | False |
| 19140736 | RXN0-7008-PRO/UBIQUINONE-8//L-DELTA1-PYRROLINE_5-CARBOXYLATE/CPD-9956/PROTON.67...PUTA-CPLX    | 29       | [59000] | 66.62    | PUTA-CPLX[c]           | ['PRO[c]']                          | ['PRO[c]']       | 25 | False |
| 11741871 | RXN0-703                                                                                       | 110      | []      | 252.7    | CPLX0-2061[c]          | ['CPD-334[c]']                      | []               | 25 | False |

|          |                                                                                |                   |             |        |                      |                                                    |                             |    |       |
|----------|--------------------------------------------------------------------------------|-------------------|-------------|--------|----------------------|----------------------------------------------------|-----------------------------|----|-------|
| 11741871 | RXN0-704                                                                       | 48                | []          | 110.3  | LYXK-CPLX[c]         | ['3-KETO-L-GULONATE[c]']                           | []                          | 25 | False |
| 11741871 | RXN0-705_CPLX0-7744                                                            | 51                | []          | 117.2  | CPLX0-7744[c]        | ['CPD-2343[c]']                                    | []                          | 25 | False |
| 11741871 | RXN0-705_EG12285-MONOMER                                                       | 64                | []          | 147    | EG12285-MONOMER[c]   | ['CPD-2343[c]']                                    | []                          | 25 | False |
| 23935849 | RXN0-7075                                                                      | 11                | [17]        | 25.27  | CPLX0-8032[c]        | ['ACETYL-COA[c]']                                  | ['ACETYL-COA[c]']           | 25 | False |
| 23935849 | RXN0-7075                                                                      | 15                | []          | 34.46  | CPLX0-8032[c]        | ['OXALATE[c]']                                     | []                          | 25 | False |
| 24509771 | RXN0-7101_KDUD-MONOMER                                                         | 0.21              | [285]       | 0.21   | KDUD-MONOMER[c]      | ['NAD[c]']                                         | ['NAD[c]']                  | 37 | False |
| 24509771 | RXN0-7101_KDUD-MONOMER (reverse)                                               | 0.5116667[]       |             | 0.5117 | KDUD-MONOMER[c]      | ['5-DEHYDROGLUCONATE[c]']                          | []                          | 37 | False |
| 24509771 | RXN0-7101_KDUD-MONOMER                                                         | 0.9716667[544800] |             | 0.9717 | KDUD-MONOMER[c]      | ['GLUCONATE[c]']                                   | ['GLUCONATE[c]']            | 37 | False |
| 16464851 | RXN0-7104                                                                      | 0.41              | []          | 0.9419 | CPLX0-3941[c]        | ['CPD-207[c]']                                     | []                          | 25 | False |
| 19384989 | RXN0-742                                                                       | 52                | [90]        | 119.5  | PURK-CPLX[c]         | ['ATP[c]', '5-PHOSPHORIBOSYL-5-AMINOIMIDAZOLE[c]'] | ['ATP[c]']                  | 25 | False |
| 22970852 | RXN0-961                                                                       | 38.3              | []          | 38.3   | CPLX0-7989[c]        | ['L-ALA-GAMMA-D-GLU-DAP[c]']                       | []                          | 37 | False |
| 21296885 | RXNMETA-12671                                                                  | 39                | []          | 110.3  | G6708-MONOMER[c]     | ['CPD0-2363[c]']                                   | []                          | 22 | False |
| 12135357 | S-ADENMETSYN-RXN                                                               | 1.5               | [92, 73]    | 4.243  | S-ADENMETSYN-CPLX[c] | ['MET[c]', 'ATP[c]']                               | ['MET[c]', 'ATP[c]']        | 22 | False |
| 16567800 | S-FORMYLGLUTATHIONE-HYDROLASE-RXN_CPLX0-3954                                   | 6.51              | []          | 6.51   | CPLX0-3954[c]        | ['CPD-548[c]']                                     | []                          | 37 | False |
| 16567800 | S-FORMYLGLUTATHIONE-HYDROLASE-RXN_G6208-MONOMER                                | 28.5              | []          | 28.5   | G6208-MONOMER[c]     | ['CPD-548[c]']                                     | []                          | 37 | False |
| 8065908  | SERINE-TRNA-LIGASE-RXN-SER-tRNAs/SER/ATP/PROTON//Charged-SER-tRNAs/AMP/PPI.52. | 0.34              | [64]        | 0.7811 | SERS-CPLX[c]         | ['SER[c]']                                         | ['SER[c]']                  | 25 | True  |
| 8065908  | SERINE-TRNA-LIGASE-RXN-SER-tRNAs/SER/ATP/PROTON//Charged-SER-tRNAs/AMP/PPI.52. | 0.35              | [0.068]     | 0.8041 | SERS-CPLX[c]         | ['ATP[c]']                                         | ['ATP[c]']                  | 25 | True  |
| 8065908  | SERINE-TRNA-LIGASE-RXN-SER-tRNAs/SER/ATP/PROTON//Charged-SER-tRNAs/AMP/PPI.52. | 2.6               | []          | 5.973  | SERS-CPLX[c]         | ['SER-tRNAs[c]']                                   | []                          | 25 | True  |
| 12627979 | SERINE-O-ACETTRAN-RXN_CPLX0-237                                                | 427               | [200, 1170] | 981    | CPLX0-237[c]         | ['ACETYL-COA[c]', 'SER[c]']                        | ['ACETYL-COA[c]', 'SER[c]'] | 25 | False |



|                                                                                                                                                                                                                                              |                                                                                                |        |                   |        |                                      |                                                                        |                                 |    |       |
|----------------------------------------------------------------------------------------------------------------------------------------------------------------------------------------------------------------------------------------------|------------------------------------------------------------------------------------------------|--------|-------------------|--------|--------------------------------------|------------------------------------------------------------------------|---------------------------------|----|-------|
| Mino, K et al<br>Effects of Bien-<br>zyme Complex<br>Formation of<br>Cysteine Syn-<br>thetase from<br>Escherichia<br>coli on Some<br>Properties and<br>Kinetics. 2014.<br>Bioscience,<br>Biotechnology,<br>and Biochem-<br>istry<br>12637497 | SERINE-O-ACETTRAN-<br>RXN_CYSSYMULTI-CPLX                                                      | 427    | [200,<br>1170]    | 981    | CYSSYMULTI-CPLX[c]                   | ['ACETYL-COA[c]', 'SER[c]']                                            | ['ACETYL-COA[c]', 'SER[c]']     | 25 | False |
| 23001854                                                                                                                                                                                                                                     | SHIKIMATE-5-<br>DEHYDROGENASE-<br>RXN_AROE-MONOMER<br>SPERMIDINESYN-RXN                        | 236.67 | [65,<br>56]       | 768.9  | AROE-MONOMER[c]                      | ['SHIKIMATE[c]', 'NADP[c]']                                            | ['SHIKIMATE[c]', 'NADP[c]']     | 20 | False |
| 10353839                                                                                                                                                                                                                                     | SUCCCOASYN-RXN (reverse)                                                                       | 44.7   | [250,<br>70, 4]   | 102.7  | SUCCCOASYN[c]                        | ['S-<br>ADENOSYLMETHIONINAMINE[c]']<br>['SUC[c]', 'ATP[c]', 'CO-A[c]'] | ['SUC[c]', 'ATP[c]', 'CO-A[c]'] | 25 | False |
| 11803023                                                                                                                                                                                                                                     | SUCCINATE-<br>DEHYDROGENASE-<br>UBIQUINONE-RXN-<br>SUC/UBIQUINONE-<br>8//FUM/CPD-9956.31.      | 85     | [2]               | 138.1  | CPLX0-8160[i]                        | ['SUC[c]']                                                             | ['SUC[c]']                      | 30 | True  |
| 10074354                                                                                                                                                                                                                                     | SUCCINYLDIAMINOPIMTRANS-<br>RXN_ACETYLORNTANSAM-<br>CPLX (reverse)                             | 0.3    | []                | 0.6892 | ACETYLORNTANSAM-<br>CPLX[c]          | ['N-SUCCINYLLL-2-6-<br>DIAMINOPIMELATE[c]']                            | []                              | 25 | False |
| 23484010                                                                                                                                                                                                                                     | SUCCORNTANSAM-RXN                                                                              | 3      | []                | 6.892  | SUCCORNTANSAM-<br>CPLX[c]            | ['N2-<br>SUCCINYLORNITHINE[c]']                                        | []                              |    | False |
| 4150390                                                                                                                                                                                                                                      | SULFITE-REDUCT-RXN                                                                             | 30     | [4.5]             | 79.17  | SULFITE-REDUCT-CPLX[c]               | ['SO3[c]', 'NADPH[c]']                                                 | ['NADPH[c]']                    | 23 | False |
| 25160617                                                                                                                                                                                                                                     | TARTRATE-<br>DEHYDROGENASE-RXN                                                                 | 0.26   | [600]             | 0.5973 | G6986-MONOMER[c]                     | ['TARTRATE[c]', 'NAD[c]']                                              | ['NAD[c]']                      | 25 | False |
| 2187529                                                                                                                                                                                                                                      | THIOREDOXIN-REDUCT-<br>NADPH-RXN-Red-<br>Thioredoxin/NADP//Ox-<br>Thioredoxin/NADPH/PROTON.50. | 22.8   | []                | 22.8   | THIOREDOXIN-REDUCT-<br>NADPH-CPLX[c] | ['Ox-Thioredoxin[c]']                                                  | []                              | 37 | False |
| 22411989                                                                                                                                                                                                                                     | THREODEHYD-<br>RXN_THREODEHYD-CPLX                                                             | 88     | [6500,<br>270]    | 202.2  | THREODEHYD-CPLX[c]                   | ['THR[c]', 'NAD[c]']                                                   | ['THR[c]', 'NAD[c]']            | 25 | False |
| 14690420                                                                                                                                                                                                                                     | THREONINE-TRNA-<br>LIGASE-RXN-THR-<br>tRNAs/THR/ATP/PROTON//Charged-<br>THR-tRNAs/AMP/PPL52.   | 90     | [0.201,<br>0.267] | 90     | THRS-CPLX[c]                         | ['THR[c]', 'ATP[c]']                                                   | ['THR[c]', 'ATP[c]']            | 37 | True  |
| 21059411                                                                                                                                                                                                                                     | THREONINE-ALDOLASE-<br>RXN                                                                     | 1.033  | [10000]           | 1.678  | LTAA-CPLX[c]                         | ['THR[c]']                                                             | ['THR[c]']                      | 30 | False |

|          |                                                                                    |      |             |           |                                  |                                                             |                                    |     |    |       |
|----------|------------------------------------------------------------------------------------|------|-------------|-----------|----------------------------------|-------------------------------------------------------------|------------------------------------|-----|----|-------|
| 7907888  | THRESYN-RXN                                                                        | 7.33 | []          | 7.33      | THRESYN-MONOMER[c]               | ['O-PHOSPHO-L-HOMOSERINE[c]']                               | []                                 |     | 37 | False |
| 15658853 | THYM-PHOSPH-RXN                                                                    | 1770 | []          | 4066      | DEOA-CPLX[c]                     | ['THYMIDINE[c]']                                            | []                                 |     | 25 | False |
| 10831428 | TREHALOSE6PSYN-RXN                                                                 | 7.3  | [8600]      | 11.86     | TREHALOSE6PSYN-MONOMER[c]        | ['CPD-12575[c]']                                            | ['CPD-12575[c]']                   |     | 30 | False |
| 10831428 | TREHALOSEPHOSPHA-RXN                                                               | 14.6 | []          | 23.72     | TREHALOSEPHOSPHASYN-MONOMER[c]   | ['TREHALOSE-6P[c]']                                         | []                                 |     | 30 | False |
| 9442062  | TRIOSEPISOMERIZATION-RXN (reverse)                                                 | 9000 | []          | 2.068e+04 | TPI[c]                           | ['GAP[c]']                                                  | []                                 |     | 25 | False |
| 22984449 | TRIPHOSPHATASE-RXN[CCO-CYTOSOL]-P3I/WATER//Pi/PPI.31...CPLX0-243                   | 16.7 | []          | 16.7      | CPLX0-243[c]                     | ['P3I[c]']                                                  | []                                 |     | 37 | False |
| 8555191  | TRYPTOPHAN-TRNA-LIGASE-RXN-TRP/TRP-tRNAs/ATP/PROTON//Charged-TRP-tRNAs/AMP/PPI.52. | 1.5  | [190]       | 1.5       | TRPS-CPLX[c]                     | ['ATP[c]', 'TRP[c]', 'TRP-tRNAs[c]']                        | ['ATP[c]']                         |     | 37 | True  |
| 8555191  | TRYPTOPHAN-TRNA-LIGASE-RXN-TRP/TRP-tRNAs/ATP/PROTON//Charged-TRP-tRNAs/AMP/PPI.52. | 2    | [12.4]      | 2         | TRPS-CPLX[c]                     | ['ATP[c]', 'TRP[c]', 'TRP-tRNAs[c]']                        | ['TRP[c]']                         |     | 37 | True  |
| 9772162  | TSA-REDUCT-RXN-GLYCERATE/NAD//TARTRONATE-S-ALD/NADH/PROTON.44.                     | 23   | []          | 65.05     | TSA-REDUCT-MONOMER[c]            | ['TARTRONATE-S-ALD[c]']                                     | []                                 |     | 22 | False |
| 12097643 | TYROSINE-TRNA-LIGASE-RXN-TYR-tRNAs/TYR/ATP/PROTON//Charged-TYR-tRNAs/AMP/PPI.52.   | 12   | [5.3]       | 12        | TYRS-CPLX[c]                     | ['TYR[c]']                                                  | ['TYR[c]']                         |     | 37 | True  |
| 8218300  | TYROSINE-AMINOTRANSFERASE-RXN_TYRB-DIMER                                           | 210  | [320, 1300] | 482.5     | TYRB-DIMER[c]                    | ['TYR[c]', 'KETOGLUTARATE[c]']                              | '2- ['TYR[c]', 'KETOGLUTARATE[c]'] | '2- | 25 | False |
| 8976565  | UDP-NACMUR-ALA-LIG-RXN                                                             | 16.3 | [48, 130]   | 16.3      | CPLX0-8014[c]                    | ['L-ALPHA-ALANINE[c]', 'UDP-N-ACETYLMURAMATE[c]', 'ATP[c]'] | ['L-ALPHA-ALANINE[c]', 'ATP[c]']   |     | 37 | False |
| 20136146 | UDPACYLGLCNACDEACETYL-RXN                                                          | 8.83 | []          | 14.34     | UDPACYLGLCNACDEACETYL-MONOMER[c] | ['UDP-OHMYR-ACETYLGLUCOSAMINE[c]']                          | []                                 |     | 30 | False |

|                                                                                                                                                                                                                                        |                                                                                                                                |       |        |       |                                                                                                                                |                                                                                                                                |                                                              |    |       |
|----------------------------------------------------------------------------------------------------------------------------------------------------------------------------------------------------------------------------------------|--------------------------------------------------------------------------------------------------------------------------------|-------|--------|-------|--------------------------------------------------------------------------------------------------------------------------------|--------------------------------------------------------------------------------------------------------------------------------|--------------------------------------------------------------|----|-------|
| Chen, X.; Kowal, P.; Hamad, S.; Fan, H.; Wang, P.G. Cloning, expression and characterization of a UDP-galactose 4-epimerase from Escherichia coli Biotechnol. Lett. 21 1131-1135 1999                                                  | UDPGLUCEPIM-RXN                                                                                                                | 18    | [1200] | 44.32 | UDPGLUCEPIM-CPLX[c]                                                                                                            | ['CPD-12575[c]']                                                                                                               | ['CPD-12575[c]']                                             | 24 | False |
| 20717852                                                                                                                                                                                                                               | UDPGLUCEPIM-RXN (reverse)                                                                                                      | 750   | []     | 861.5 | UDPGLUCEPIM-CPLX[c]                                                                                                            | ['CPD-14553[c]']                                                                                                               | []                                                           | 35 | False |
| 10480918                                                                                                                                                                                                                               | UDPNACETYLGLUCOSAMACYLTRANSFERASE-RXN-R-3-hydroxymyristoyl-ACPs/UDP-N-ACETYLD-GLUCOSAMINE//UDP-OHMYR-ACETYLGLUCOSAMINE/ACP.86. | [820] | [820]  | 11.65 | UDPNACETYLGLUCOSAMACYLTRANSFERASE-RXN-R-3-hydroxymyristoyl-ACPs/UDP-N-ACETYLD-GLUCOSAMINE//UDP-OHMYR-ACETYLGLUCOSAMINE/ACP.86. | UDPNACETYLGLUCOSAMACYLTRANSFERASE-RXN-R-3-hydroxymyristoyl-ACPs/UDP-N-ACETYLD-GLUCOSAMINE//UDP-OHMYR-ACETYLGLUCOSAMINE/ACP.86. | ['UDP-N-ACETYLD-GLUCOSAMINE[c]']                             | 30 | False |
| Dube, S.; Nanda, K.; Rani, R.; Kaur, N.; Nagpal, J.; Upadhyay, D.; Cliffe, I.; Saini, K.; Purnapatre, K. UDP-N-acetylglucosamine enolpyruvyl transferase from Pseudomonas aeruginosa World J. Microbiol. Biotechnol. 26 1623-1629 2010 | UDPNACETYLGLUCOSAMENOLPYRUVYLTRANSFERASE-RXN                                                                                   | 36    | [0.84] | 2.4   | UDPNACETYLGLUCOSAMENOLPYRUVYLTRANSFERASE-RXN                                                                                   | UDPNACETYLGLUCOSAMENOLPYRUVYLTRANSFERASE-RXN                                                                                   | ['UDP-N-ACETYLD-GLUCOSAMINE[c]', 'PHOSPHO-ENOL-PYRUVATE[c]'] | 37 | False |
| 16436710                                                                                                                                                                                                                               | UDPNACETYLMURAMATEDEHYDRASE-RXN                                                                                                | [11]  | [11]   | 34.46 | UDPNACETYLMURAMATEDEHYDRASE-RXN                                                                                                | UDPNACETYLMURAMATEDEHYDRASE-RXN                                                                                                | ['NADPH[c]']                                                 |    | False |
| 8689233                                                                                                                                                                                                                                | UGD-RXN                                                                                                                        | 11.3  | []     | 25.96 | CPLX0-8098[c]                                                                                                                  | ['CPD-12575[c]']                                                                                                               | []                                                           | 25 | False |
| 18411271                                                                                                                                                                                                                               | UNDECAPRENYLDIPHOSPHATASE-RXN_PGPPHOSPHAB-MONOMER                                                                              | 50    | [360]  | 50    | PGPPHOSPHAB-MONOMER[i]                                                                                                         | ['UNDECAPRENYLDIPHOSPHATE[c]']                                                                                                 | ['UNDECAPRENYLDIPHOSPHATE[c]']                               | 37 | False |
| 17309433                                                                                                                                                                                                                               | URA-PHOSPH-RXN                                                                                                                 | 35    | []     | 80.41 | DEOA-CPLX[c]                                                                                                                   | ['DEOXYURIDINE[c]']                                                                                                            | []                                                           | 25 | False |

|                                                                                                                                                                                                                                                                                                                                    |                                                                                            |      |        |       |                        |                             |                |  |    |       |
|------------------------------------------------------------------------------------------------------------------------------------------------------------------------------------------------------------------------------------------------------------------------------------------------------------------------------------|--------------------------------------------------------------------------------------------|------|--------|-------|------------------------|-----------------------------|----------------|--|----|-------|
| 2557837                                                                                                                                                                                                                                                                                                                            | UROGENIISYN-RXN                                                                            | 500  | []     | 1149  | UROGENIISYN-MONOMER[c] | ['HYDROXYMETHYLBILANE[c]']  |                |  |    | False |
| Panova, N.G.;<br>Shcheveleva,<br>E.V.; Alexeev,<br>C.S.; Mukhor-<br>tov, V.G.; Zuev,<br>A.N.; Mikhailov,<br>S.N.; Esipov,<br>R.S.; Chu-<br>vikovsky, D.V.;<br>Miroshnikov,<br>A.I. Use of 4-<br>thiouridine and<br>4-thiothymidine<br>in studies on<br>pyrimidine<br>nucleoside<br>phosphorylases<br>Mol. Biol. 38<br>770-776 2004 | URPHOS-RXN (reverse)                                                                       | 98   | [80]   | 225.1 | URPHOS-CPLX[c]         | ['URIDINE[c]']              | ['URIDINE[c]'] |  | 25 | False |
| 20498377                                                                                                                                                                                                                                                                                                                           | VALINE-TRNA-<br>LIGASE-RXN-VAL-<br>tRNAs/VAL/ATP/PROTON//Charged-<br>VAL-tRNAs/AMP/PPI.52. | 12.9 | [9400] | 12.9  | VALS-MONOMER[c]        | ['ATP[c]']                  | ['ATP[c]']     |  | 37 | True  |
| 14970394                                                                                                                                                                                                                                                                                                                           | VALINE-TRNA-<br>LIGASE-RXN-VAL-<br>tRNAs/VAL/ATP/PROTON//Charged-<br>VAL-tRNAs/AMP/PPI.52. | 13.9 | [4.3]  | 13.9  | VALS-MONOMER[c]        | ['VAL[c]']                  | ['VAL[c]']     |  | 37 | True  |
| 16843487                                                                                                                                                                                                                                                                                                                           | VALINE-TRNA-<br>LIGASE-RXN-VAL-<br>tRNAs/VAL/ATP/PROTON//Charged-<br>VAL-tRNAs/AMP/PPI.52. | 4    | []     | 9.19  | VALS-MONOMER[c]        | ['VAL-tRNAs[c]']            | []             |  |    | True  |
| 9100006                                                                                                                                                                                                                                                                                                                            | XANPRIBOSYLTRAN-RXN                                                                        | 150  | []     | 344.6 | GPT-CPLX[i]            | ['XANTHINE[c]']             | []             |  | 25 | False |
| 17123542                                                                                                                                                                                                                                                                                                                           | XYLULOKIN-RXN                                                                              | 255  | [150]  | 585.8 | CPLX0-7466[c]          | ['D-XYLULOSE[c]', 'ATP[c]'] | ['ATP[c]']     |  | 25 | False |

**Table S9. Data sources used in the model and presented in Movie S1.** Citation or PMID show reference to original data source. Data used represents the number of data points included in the model, represented by the size of dots in the movie. Process is the model related process that uses the data. Equation is the grouping the animated dot moves to in the movie. The table is also included in the GitHub repository: [wcEcoli/paper/movie\\_data\\_sources.tsv](https://github.com/wcEcoli/paper/movie_data_sources.tsv).

| Citation                                                                                    | PMID     | Year Published | Data Used | Process                  | Equation |
|---------------------------------------------------------------------------------------------|----------|----------------|-----------|--------------------------|----------|
|                                                                                             | 7918446  | 1994           | 6         | translation              | Protein  |
|                                                                                             | 9748544  | 1998           | 4         | translation              | Protein  |
|                                                                                             | 2009959  | 1991           | 4         | translation              | Protein  |
|                                                                                             | 9171418  | 1997           | 4         | translation              | Protein  |
|                                                                                             | 12662918 | 2003           | 6         | translation              | Protein  |
|                                                                                             | 368055   | 1979           | 4         | translation              | Protein  |
|                                                                                             | 6989402  | 1980           | 4         | translation              | Protein  |
|                                                                                             | 4594761  | 1974           | 4         | translation              | Protein  |
|                                                                                             | 15751955 | 2005           | 6         | translation              | Protein  |
|                                                                                             | 8672449  | 1996           | 4         | translation              | Protein  |
|                                                                                             | 12739900 | 2003           | 6         | translation              | Protein  |
|                                                                                             | 15362869 | 2004           | 4         | translation              | Protein  |
|                                                                                             | 9607323  | 1998           | 2         | translation              | Protein  |
|                                                                                             | 21175197 | 2011           | 6         | translation              | Protein  |
|                                                                                             | 16866361 | 2006           | 4         | translation              | Protein  |
|                                                                                             | 11408489 | 2001           | 2         | translation              | Protein  |
|                                                                                             | 8065908  | 1994           | 6         | translation              | Protein  |
|                                                                                             | 14690420 | 2003           | 4         | translation              | Protein  |
|                                                                                             | 8555191  | 1996           | 5         | translation              | Protein  |
|                                                                                             | 12097643 | 2002           | 2         | translation              | Protein  |
|                                                                                             | 12475234 | 2002           | 6         | translation              | Protein  |
| <a href="https://doi.org/10.1006/jmbi.1996.0428">https://doi.org/10.1006/jmbi.1996.0428</a> |          | 1996           | 220       | transcription            | RNA      |
| GSE11183                                                                                    |          | 2009           | 4353      | transcription regulation | RNA      |
| GSE1121                                                                                     |          | 2004           | 4353      | transcription regulation | RNA      |
| GSE12006                                                                                    |          | 2008           | 4353      | transcription regulation | RNA      |
| GSE15050                                                                                    |          | 2009           | 4353      | transcription regulation | RNA      |
| GSE17519                                                                                    |          | 2009           | 4353      | transcription regulation | RNA      |
| GSE17584                                                                                    |          | 2009           | 4353      | transcription regulation | RNA      |
| GSE21857                                                                                    |          | 2012           | 4353      | transcription regulation | RNA      |
| GSE24524                                                                                    |          | 2012           | 4353      | transcription regulation | RNA      |
| GSE25318                                                                                    |          | 2011           | 4353      | transcription regulation | RNA      |
| GSE26591                                                                                    |          | 2012           | 4353      | transcription regulation | RNA      |
| GSE29076                                                                                    |          | 2005           | 4353      | transcription regulation | RNA      |
| GSE31029                                                                                    |          | 2011           | 4353      | transcription regulation | RNA      |
| GSE33147                                                                                    |          | 2011           | 4353      | transcription regulation | RNA      |
| GSE34023                                                                                    |          | 2012           | 4353      | transcription regulation | RNA      |
| GSE34275                                                                                    |          | 2011           | 4353      | transcription regulation | RNA      |
| GSE40313                                                                                    |          | 2012           | 4353      | transcription regulation | RNA      |
| GSE4724                                                                                     |          | 2006           | 4353      | transcription regulation | RNA      |
| GSE50529                                                                                    |          | 2014           | 4353      | transcription regulation | RNA      |
| GSE54901                                                                                    |          | 2014           | 4353      | transcription regulation | RNA      |
| GSE55365                                                                                    |          | 2014           | 4353      | transcription regulation | RNA      |
| GSE55662                                                                                    |          | 2014           | 4353      | transcription regulation | RNA      |
| GSE65712                                                                                    |          | 2015           | 4353      | transcription regulation | RNA      |
| GSE66482                                                                                    |          | 2015           | 4353      | transcription regulation | RNA      |

Table S9 continued.

| Citation                                                                                                            | PMID     | Year Published | Data Used | Process                  | Equation   |
|---------------------------------------------------------------------------------------------------------------------|----------|----------------|-----------|--------------------------|------------|
| GSE6836                                                                                                             |          | 2007           | 4353      | transcription regulation | RNA        |
| GSE6992                                                                                                             |          | 2007           | 4353      | transcription regulation | RNA        |
| GSE72525                                                                                                            |          | 2015           | 4353      | transcription regulation | RNA        |
| GSE7398                                                                                                             |          | 2007           | 4353      | transcription regulation | RNA        |
| GSE9755                                                                                                             |          | 2007           | 4353      | transcription regulation | RNA        |
| PMC219383                                                                                                           |          | 2003           | 4353      | transcription regulation | RNA        |
| PMC400601                                                                                                           |          | 2004           | 4353      | transcription regulation | RNA        |
| PMC4299492                                                                                                          |          | 2014           | 4353      | transcription regulation | RNA        |
| PMC545700                                                                                                           |          | 2005           | 4353      | transcription regulation | RNA        |
|                                                                                                                     | 17803904 | 2007           | 4353      | transcription regulation | RNA        |
| PMC2797255                                                                                                          |          | 2009           | 1         | rna degradation          | RNA        |
| PMC438955                                                                                                           |          | 2004           | 2         | rna degradation          | RNA        |
| PMID: 7535857                                                                                                       |          | 1995           | 1         | rna degradation          | RNA        |
| PMID: 7544280                                                                                                       |          | 1995           | 1         | rna degradation          | RNA        |
| PMC2223728                                                                                                          |          | 2008           | 1         | rna degradation          | RNA        |
| PMC1935014                                                                                                          |          | 2007           | 1         | rna degradation          | RNA        |
| PMC140075                                                                                                           |          | 2002           | 9         | rna degradation          | RNA        |
| PMC1360286                                                                                                          |          | 2006           | 8         | rna degradation          | RNA        |
| <a href="https://www.researchgate.net/publication/237130769">https://www.researchgate.net/publication/237130769</a> |          | 1996           | 2         | dna replication          | RNA        |
| <a href="https://www.ncbi.nlm.nih.gov/nucore/U00096.3">https://www.ncbi.nlm.nih.gov/nucore/U00096.3</a>             |          | 2013           | 1         | dna replication          | RNA        |
| 10.1093/nar/gkv1156                                                                                                 |          | 2016           | 902       | transcription regulation | RNA        |
| <a href="https://www.researchgate.net/publication/237130769">https://www.researchgate.net/publication/237130769</a> |          | 1996           | 10        | transcription            | RNA        |
| This study                                                                                                          |          | 2017           | 4353      | transcription            | RNA        |
| doi: 10.1073/pnas.112318199                                                                                         |          | 2002           | 3835      | rna degradation          | RNA        |
| DOI: 10.1126/science.3018930                                                                                        |          | 1986           | 20        | protein degradation      | Protein    |
| <a href="https://www.researchgate.net/publication/237130769">https://www.researchgate.net/publication/237130769</a> |          | 1996           | 6         | translation              | Protein    |
| 10.1016/j.cell.2014.02.033                                                                                          |          | 2014           | 4032      | translation              | Protein    |
| doi:10.1186/1752-0509-8-79                                                                                          |          | 2014           | 2638      | complexation             | Protein    |
| doi:10.1186/1752-0509-8-79                                                                                          |          | 2014           | 10321     | metabolism               | Metabolite |
| doi:10.1038/nchembio.186                                                                                            |          | 2009           | 91        | metabolism               | Metabolite |
|                                                                                                                     | 9387     | 1976           | 2         | metabolism               | Metabolite |
|                                                                                                                     | 346589   | 1978           | 1         | metabolism               | Metabolite |
|                                                                                                                     | 357906   | 1978           | 2         | metabolism               | Metabolite |
|                                                                                                                     | 374409   | 1979           | 1         | metabolism               | Metabolite |
|                                                                                                                     | 1092682  | 1975           | 2         | metabolism               | Metabolite |
|                                                                                                                     | 1099093  | 1975           | 1         | metabolism               | Metabolite |
|                                                                                                                     | 1329945  | 1992           | 2         | metabolism               | Metabolite |
|                                                                                                                     | 1544480  | 1992           | 4         | metabolism               | Metabolite |
|                                                                                                                     | 1644758  | 1992           | 2         | metabolism               | Metabolite |
|                                                                                                                     | 1906883  | 1991           | 1         | metabolism               | Metabolite |
|                                                                                                                     | 1924337  | 1991           | 1         | metabolism               | Metabolite |
|                                                                                                                     | 1993184  | 1991           | 2         | metabolism               | Metabolite |
|                                                                                                                     | 2007545  | 1991           | 1         | metabolism               | Metabolite |
|                                                                                                                     | 2111176  | 1990           | 4         | metabolism               | Metabolite |
|                                                                                                                     | 2126467  | 1991           | 1         | metabolism               | Metabolite |
|                                                                                                                     | 2139795  | 1990           | 2         | metabolism               | Metabolite |
|                                                                                                                     | 2144454  | 1990           | 1         | metabolism               | Metabolite |
|                                                                                                                     | 2187529  | 1990           | 1         | metabolism               | Metabolite |
|                                                                                                                     | 2494074  | 1989           | 1         | metabolism               | Metabolite |
|                                                                                                                     | 2514789  | 1990           | 1         | metabolism               | Metabolite |
|                                                                                                                     | 2531000  | 1990           | 4         | metabolism               | Metabolite |
|                                                                                                                     | 2549047  | 1989           | 2         | metabolism               | Metabolite |
|                                                                                                                     | 2557837  | 1990           | 1         | metabolism               | Metabolite |
|                                                                                                                     | 2651124  | 1989           | 2         | metabolism               | Metabolite |
|                                                                                                                     | 2659070  | 1989           | 3         | metabolism               | Metabolite |

Table S9 continued.

| Citation | PMID     | Year Published | Data Used | Process    | Equation   |
|----------|----------|----------------|-----------|------------|------------|
|          | 2689171  | 1990           | 1         | metabolism | Metabolite |
|          | 2826481  | 1988           | 2         | metabolism | Metabolite |
|          | 2986688  | 1985           | 1         | metabolism | Metabolite |
|          | 3003503  | 1986           | 3         | metabolism | Metabolite |
|          | 4150390  | 1974           | 2         | metabolism | Metabolite |
|          | 6142052  | 1984           | 4         | metabolism | Metabolite |
|          | 6300054  | 1983           | 6         | metabolism | Metabolite |
|          | 6378903  | 1984           | 1         | metabolism | Metabolite |
|          | 6395895  | 1985           | 4         | metabolism | Metabolite |
|          | 6792201  | 1981           | 2         | metabolism | Metabolite |
|          | 7696318  | 1995           | 1         | metabolism | Metabolite |
|          | 7727400  | 1995           | 1         | metabolism | Metabolite |
|          | 7751290  | 1995           | 2         | metabolism | Metabolite |
|          | 7775463  | 1995           | 3         | metabolism | Metabolite |
|          | 7860596  | 1995           | 1         | metabolism | Metabolite |
|          | 7873670  | 1995           | 2         | metabolism | Metabolite |
|          | 7907888  | 1994           | 1         | metabolism | Metabolite |
|          | 7918446  | 1994           | 3         | metabolism | Metabolite |
|          | 8065908  | 1994           | 5         | metabolism | Metabolite |
|          | 8083170  | 1994           | 3         | metabolism | Metabolite |
|          | 8203917  | 1994           | 2         | metabolism | Metabolite |
|          | 8218300  | 1993           | 3         | metabolism | Metabolite |
|          | 8394006  | 1993           | 1         | metabolism | Metabolite |
|          | 8422384  | 1993           | 3         | metabolism | Metabolite |
|          | 8550422  | 1996           | 1         | metabolism | Metabolite |
|          | 8555191  | 1996           | 4         | metabolism | Metabolite |
|          | 8672449  | 1996           | 3         | metabolism | Metabolite |
|          | 8689233  | 1996           | 1         | metabolism | Metabolite |
|          | 8706750  | 1996           | 5         | metabolism | Metabolite |
|          | 8706854  | 1996           | 3         | metabolism | Metabolite |
|          | 8831972  | 1997           | 2         | metabolism | Metabolite |
|          | 8969520  | 1997           | 1         | metabolism | Metabolite |
|          | 8973190  | 1997           | 2         | metabolism | Metabolite |
|          | 8976565  | 1997           | 3         | metabolism | Metabolite |
|          | 9003442  | 1997           | 2         | metabolism | Metabolite |
|          | 9015391  | 1997           | 1         | metabolism | Metabolite |
|          | 9056491  | 1997           | 2         | metabolism | Metabolite |
|          | 9100006  | 1997           | 4         | metabolism | Metabolite |
|          | 9211277  | 1997           | 2         | metabolism | Metabolite |
|          | 9211333  | 1997           | 2         | metabolism | Metabolite |
|          | 9266856  | 1997           | 4         | metabolism | Metabolite |
|          | 9391059  | 1998           | 1         | metabolism | Metabolite |
|          | 9398312  | 1998           | 1         | metabolism | Metabolite |
|          | 9442062  | 1998           | 1         | metabolism | Metabolite |
|          | 9492273  | 1998           | 1         | metabolism | Metabolite |
|          | 9548961  | 1998           | 1         | metabolism | Metabolite |
|          | 9581571  | 1998           | 1         | metabolism | Metabolite |
|          | 9607323  | 1998           | 1         | metabolism | Metabolite |
|          | 9610360  | 1998           | 1         | metabolism | Metabolite |
|          | 9657697  | 1998           | 4         | metabolism | Metabolite |
|          | 9748544  | 1998           | 3         | metabolism | Metabolite |
|          | 9772162  | 1998           | 5         | metabolism | Metabolite |
|          | 9878448  | 1999           | 2         | metabolism | Metabolite |
|          | 9927652  | 1999           | 2         | metabolism | Metabolite |
|          | 10026151 | 1999           | 2         | metabolism | Metabolite |

Table S9 continued.

| Citation | PMID     | Year Published | Data Used | Process    | Equation   |
|----------|----------|----------------|-----------|------------|------------|
|          | 10074354 | 1999           | 1         | metabolism | Metabolite |
|          | 10225425 | 1999           | 1         | metabolism | Metabolite |
|          | 10231382 | 1999           | 1         | metabolism | Metabolite |
|          | 10353839 | 1999           | 4         | metabolism | Metabolite |
|          | 10387054 | 1999           | 2         | metabolism | Metabolite |
|          | 10406936 | 1999           | 2         | metabolism | Metabolite |
|          | 10480918 | 1999           | 2         | metabolism | Metabolite |
|          | 10529181 | 1999           | 1         | metabolism | Metabolite |
|          | 10542272 | 1999           | 1         | metabolism | Metabolite |
|          | 10642176 | 2000           | 2         | metabolism | Metabolite |
|          | 10757968 | 2000           | 1         | metabolism | Metabolite |
|          | 10769117 | 2000           | 5         | metabolism | Metabolite |
|          | 10769128 | 2000           | 1         | metabolism | Metabolite |
|          | 10820011 | 2000           | 1         | metabolism | Metabolite |
|          | 10821675 | 2000           | 1         | metabolism | Metabolite |
|          | 10828971 | 2000           | 1         | metabolism | Metabolite |
|          | 10831428 | 2000           | 3         | metabolism | Metabolite |
|          | 10989422 | 2000           | 12        | metabolism | Metabolite |
|          | 11084021 | 2001           | 1         | metabolism | Metabolite |
|          | 11094340 | 2000           | 1         | metabolism | Metabolite |
|          | 11106175 | 2001           | 2         | metabolism | Metabolite |
|          | 11237876 | 2001           | 4         | metabolism | Metabolite |
|          | 11342129 | 2001           | 1         | metabolism | Metabolite |
|          | 11380254 | 2001           | 1         | metabolism | Metabolite |
|          | 11488932 | 2001           | 4         | metabolism | Metabolite |
|          | 11515538 | 2001           | 1         | metabolism | Metabolite |
|          | 11527960 | 2001           | 1         | metabolism | Metabolite |
|          | 11604533 | 2001           | 1         | metabolism | Metabolite |
|          | 11686925 | 2001           | 1         | metabolism | Metabolite |
|          | 11724562 | 2001           | 2         | metabolism | Metabolite |
|          | 11736651 | 2001           | 2         | metabolism | Metabolite |
|          | 11741871 | 2001           | 5         | metabolism | Metabolite |
|          | 11747300 | 2001           | 2         | metabolism | Metabolite |
|          | 11747447 | 2001           | 1         | metabolism | Metabolite |
|          | 11803023 | 2002           | 2         | metabolism | Metabolite |
|          | 11814333 | 2002           | 1         | metabolism | Metabolite |
|          | 11934293 | 2002           | 1         | metabolism | Metabolite |
|          | 11967363 | 2002           | 3         | metabolism | Metabolite |
|          | 12021453 | 2002           | 2         | metabolism | Metabolite |
|          | 12097643 | 2002           | 2         | metabolism | Metabolite |
|          | 12135357 | 2002           | 3         | metabolism | Metabolite |
|          | 12356303 | 2002           | 1         | metabolism | Metabolite |
|          | 12370189 | 2002           | 2         | metabolism | Metabolite |
|          | 12383057 | 2003           | 4         | metabolism | Metabolite |
|          | 12517338 | 2003           | 1         | metabolism | Metabolite |
|          | 12535615 | 2003           | 4         | metabolism | Metabolite |
|          | 12627979 | 2003           | 3         | metabolism | Metabolite |
|          | 12637497 | 2003           | 7         | metabolism | Metabolite |
|          | 12706338 | 2003           | 6         | metabolism | Metabolite |
|          | 12711733 | 2003           | 1         | metabolism | Metabolite |
|          | 12805358 | 2003           | 2         | metabolism | Metabolite |
|          | 12824188 | 2003           | 2         | metabolism | Metabolite |
|          | 12937174 | 2003           | 2         | metabolism | Metabolite |
|          | 12975365 | 2003           | 1         | metabolism | Metabolite |
|          | 13785427 | 1961           | 1         | metabolism | Metabolite |



Table S9 continued.

| Citation | PMID     | Year Published | Data Used | Process    | Equation   |
|----------|----------|----------------|-----------|------------|------------|
|          | 14556652 | 2004           | 1         | metabolism | Metabolite |
|          | 14597191 | 2003           | 1         | metabolism | Metabolite |
|          | 14640961 | 2003           | 2         | metabolism | Metabolite |
|          | 14690420 | 2003           | 3         | metabolism | Metabolite |
|          | 14767072 | 2004           | 3         | metabolism | Metabolite |
|          | 14970394 | 2004           | 2         | metabolism | Metabolite |
|          | 14982443 | 2004           | 2         | metabolism | Metabolite |
|          | 15049687 | 2004           | 2         | metabolism | Metabolite |
|          | 15066435 | 2004           | 1         | metabolism | Metabolite |
|          | 15110746 | 2004           | 4         | metabolism | Metabolite |
|          | 15157072 | 2004           | 6         | metabolism | Metabolite |
|          | 15248753 | 2004           | 2         | metabolism | Metabolite |
|          | 15249053 | 2004           | 2         | metabolism | Metabolite |
|          | 15271350 | 2004           | 1         | metabolism | Metabolite |
|          | 15289581 | 2004           | 4         | metabolism | Metabolite |
|          | 15308670 | 2004           | 2         | metabolism | Metabolite |
|          | 15362869 | 2004           | 2         | metabolism | Metabolite |
|          | 15379557 | 2004           | 1         | metabolism | Metabolite |
|          | 15489502 | 2004           | 14        | metabolism | Metabolite |
|          | 15489861 | 2004           | 1         | metabolism | Metabolite |
|          | 15498577 | 2004           | 2         | metabolism | Metabolite |
|          | 15531627 | 2004           | 2         | metabolism | Metabolite |
|          | 15654896 | 2005           | 3         | metabolism | Metabolite |
|          | 15658853 | 2005           | 1         | metabolism | Metabolite |
|          | 15680231 | 2005           | 1         | metabolism | Metabolite |
|          | 15723541 | 2005           | 1         | metabolism | Metabolite |
|          | 15796715 | 2005           | 3         | metabolism | Metabolite |
|          | 15797252 | 2005           | 3         | metabolism | Metabolite |
|          | 15843156 | 2005           | 1         | metabolism | Metabolite |
|          | 15938625 | 2005           | 2         | metabolism | Metabolite |
|          | 15967977 | 2005           | 1         | metabolism | Metabolite |
|          | 16023116 | 2005           | 2         | metabolism | Metabolite |
|          | 16039592 | 2005           | 4         | metabolism | Metabolite |
|          | 16077126 | 2005           | 4         | metabolism | Metabolite |
|          | 16101288 | 2005           | 1         | metabolism | Metabolite |
|          | 16199563 | 2005           | 2         | metabolism | Metabolite |
|          | 16201833 | 2005           | 2         | metabolism | Metabolite |
|          | 16221850 | 2005           | 1         | metabolism | Metabolite |
|          | 16297670 | 2006           | 3         | metabolism | Metabolite |
|          | 16427816 | 2006           | 2         | metabolism | Metabolite |
|          | 16436710 | 2006           | 2         | metabolism | Metabolite |
|          | 16464851 | 2006           | 2         | metabolism | Metabolite |
|          | 16480719 | 2006           | 1         | metabolism | Metabolite |
|          | 16567800 | 2006           | 3         | metabolism | Metabolite |
|          | 16672604 | 2006           | 3         | metabolism | Metabolite |
|          | 16731973 | 2006           | 2         | metabolism | Metabolite |
|          | 16766526 | 2006           | 4         | metabolism | Metabolite |
|          | 16793549 | 2006           | 2         | metabolism | Metabolite |
|          | 16813561 | 2006           | 4         | metabolism | Metabolite |
|          | 16829675 | 2006           | 3         | metabolism | Metabolite |
|          | 16843487 | 2006           | 1         | metabolism | Metabolite |
|          | 16864571 | 2006           | 2         | metabolism | Metabolite |
|          | 16966333 | 2006           | 1         | metabolism | Metabolite |
|          | 16981730 | 2006           | 3         | metabolism | Metabolite |
|          | 16990279 | 2006           | 15        | metabolism | Metabolite |

Table S9 continued.

| Citation | PMID     | Year Published | Data Used | Process    | Equation   |
|----------|----------|----------------|-----------|------------|------------|
|          | 16990935 | 2006           | 2         | metabolism | Metabolite |
|          | 17059210 | 2006           | 1         | metabolism | Metabolite |
|          | 17079236 | 2006           | 2         | metabolism | Metabolite |
|          | 17123542 | 2006           | 2         | metabolism | Metabolite |
|          | 17176045 | 2007           | 2         | metabolism | Metabolite |
|          | 17240978 | 2007           | 1         | metabolism | Metabolite |
|          | 17309433 | 2007           | 1         | metabolism | Metabolite |
|          | 17401542 | 2007           | 3         | metabolism | Metabolite |
|          | 17442255 | 2007           | 2         | metabolism | Metabolite |
|          | 17535911 | 2007           | 1         | metabolism | Metabolite |
|          | 17542990 | 2007           | 3         | metabolism | Metabolite |
|          | 17557829 | 2007           | 6         | metabolism | Metabolite |
|          | 17559838 | 2007           | 1         | metabolism | Metabolite |
|          | 17568739 | 2007           | 3         | metabolism | Metabolite |
|          | 17616624 | 2007           | 1         | metabolism | Metabolite |
|          | 17635929 | 2007           | 2         | metabolism | Metabolite |
|          | 17698004 | 2007           | 3         | metabolism | Metabolite |
|          | 17947381 | 2007           | 1         | metabolism | Metabolite |
|          | 17996716 | 2008           | 1         | metabolism | Metabolite |
|          | 18056714 | 2008           | 1         | metabolism | Metabolite |
|          | 18081839 | 2008           | 2         | metabolism | Metabolite |
|          | 18083802 | 2008           | 3         | metabolism | Metabolite |
|          | 18085797 | 2008           | 1         | metabolism | Metabolite |
|          | 18284213 | 2008           | 1         | metabolism | Metabolite |
|          | 18353368 | 2008           | 6         | metabolism | Metabolite |
|          | 18390652 | 2008           | 1         | metabolism | Metabolite |
|          | 18411271 | 2008           | 2         | metabolism | Metabolite |
|          | 18458150 | 2008           | 4         | metabolism | Metabolite |
|          | 18459799 | 2008           | 4         | metabolism | Metabolite |
|          | 18567546 | 2008           | 2         | metabolism | Metabolite |
|          | 18576672 | 2008           | 1         | metabolism | Metabolite |
|          | 18754693 | 2008           | 2         | metabolism | Metabolite |
|          | 18837509 | 2008           | 1         | metabolism | Metabolite |
|          | 18990827 | 2008           | 2         | metabolism | Metabolite |
|          | 19073594 | 2009           | 8         | metabolism | Metabolite |
|          | 19099445 | 2009           | 1         | metabolism | Metabolite |
|          | 19140736 | 2009           | 4         | metabolism | Metabolite |
|          | 19307712 | 2009           | 2         | metabolism | Metabolite |
|          | 19370061 | 2009           | 4         | metabolism | Metabolite |
|          | 19384989 | 2009           | 4         | metabolism | Metabolite |
|          | 19583219 | 2009           | 1         | metabolism | Metabolite |
|          | 19664587 | 2009           | 1         | metabolism | Metabolite |
|          | 19678710 | 2009           | 1         | metabolism | Metabolite |
|          | 19797049 | 2009           | 2         | metabolism | Metabolite |
|          | 19883126 | 2009           | 1         | metabolism | Metabolite |
|          | 20050615 | 2010           | 1         | metabolism | Metabolite |
|          | 20136146 | 2010           | 1         | metabolism | Metabolite |
|          | 20160120 | 2010           | 2         | metabolism | Metabolite |
|          | 20170126 | 2010           | 4         | metabolism | Metabolite |
|          | 20364820 | 2010           | 1         | metabolism | Metabolite |
|          | 20416269 | 2010           | 2         | metabolism | Metabolite |
|          | 20452364 | 2010           | 1         | metabolism | Metabolite |
|          | 20480490 | 2010           | 1         | metabolism | Metabolite |
|          | 20498377 | 2010           | 2         | metabolism | Metabolite |
|          | 20553497 | 2010           | 1         | metabolism | Metabolite |

Table S9 continued.

| Citation                                                                                                                                                        | PMID     | Year Published | Data Used | Process             | Equation   |
|-----------------------------------------------------------------------------------------------------------------------------------------------------------------|----------|----------------|-----------|---------------------|------------|
|                                                                                                                                                                 | 20717852 | 2011           | 1         | metabolism          | Metabolite |
|                                                                                                                                                                 | 20853825 | 2010           | 6         | metabolism          | Metabolite |
|                                                                                                                                                                 | 20887711 | 2010           | 2         | metabolism          | Metabolite |
|                                                                                                                                                                 | 21046341 | 2010           | 10        | metabolism          | Metabolite |
|                                                                                                                                                                 | 21059411 | 2011           | 7         | metabolism          | Metabolite |
|                                                                                                                                                                 | 21081107 | 2011           | 2         | metabolism          | Metabolite |
|                                                                                                                                                                 | 21119630 | 2010           | 3         | metabolism          | Metabolite |
|                                                                                                                                                                 | 21169495 | 2011           | 2         | metabolism          | Metabolite |
|                                                                                                                                                                 | 21278708 | 2011           | 2         | metabolism          | Metabolite |
|                                                                                                                                                                 | 21279421 | 2011           | 1         | metabolism          | Metabolite |
|                                                                                                                                                                 | 21296885 | 2011           | 1         | metabolism          | Metabolite |
|                                                                                                                                                                 | 21298178 | 2011           | 3         | metabolism          | Metabolite |
|                                                                                                                                                                 | 21669179 | 2011           | 2         | metabolism          | Metabolite |
|                                                                                                                                                                 | 21696459 | 2011           | 1         | metabolism          | Metabolite |
|                                                                                                                                                                 | 21704016 | 2011           | 1         | metabolism          | Metabolite |
|                                                                                                                                                                 | 21832062 | 2011           | 2         | metabolism          | Metabolite |
|                                                                                                                                                                 | 21928762 | 2011           | 2         | metabolism          | Metabolite |
|                                                                                                                                                                 | 21998098 | 2011           | 1         | metabolism          | Metabolite |
|                                                                                                                                                                 | 22017312 | 2011           | 2         | metabolism          | Metabolite |
|                                                                                                                                                                 | 22059588 | 2011           | 1         | metabolism          | Metabolite |
|                                                                                                                                                                 | 22138634 | 2012           | 2         | metabolism          | Metabolite |
|                                                                                                                                                                 | 22173092 | 2012           | 1         | metabolism          | Metabolite |
|                                                                                                                                                                 | 22411989 | 2012           | 3         | metabolism          | Metabolite |
|                                                                                                                                                                 | 22443469 | 2012           | 1         | metabolism          | Metabolite |
|                                                                                                                                                                 | 22471615 | 2013           | 1         | metabolism          | Metabolite |
|                                                                                                                                                                 | 22970852 | 2012           | 1         | metabolism          | Metabolite |
|                                                                                                                                                                 | 22984449 | 2012           | 1         | metabolism          | Metabolite |
|                                                                                                                                                                 | 23001854 | 2013           | 1         | metabolism          | Metabolite |
|                                                                                                                                                                 | 23018273 | 2012           | 1         | metabolism          | Metabolite |
|                                                                                                                                                                 | 23237860 | 2013           | 3         | metabolism          | Metabolite |
|                                                                                                                                                                 | 23484010 | 2013           | 1         | metabolism          | Metabolite |
|                                                                                                                                                                 | 23564174 | 2013           | 1         | metabolism          | Metabolite |
|                                                                                                                                                                 | 23879525 | 2013           | 2         | metabolism          | Metabolite |
|                                                                                                                                                                 | 23935849 | 2013           | 3         | metabolism          | Metabolite |
|                                                                                                                                                                 | 24123841 | 2013           | 1         | metabolism          | Metabolite |
|                                                                                                                                                                 | 24210219 | 2013           | 3         | metabolism          | Metabolite |
|                                                                                                                                                                 | 24479701 | 2014           | 2         | metabolism          | Metabolite |
|                                                                                                                                                                 | 24509771 | 2014           | 8         | metabolism          | Metabolite |
|                                                                                                                                                                 | 24530526 | 2014           | 1         | metabolism          | Metabolite |
|                                                                                                                                                                 | 25160617 | 2014           | 6         | metabolism          | Metabolite |
|                                                                                                                                                                 | 25225400 | 2014           | 1         | metabolism          | Metabolite |
|                                                                                                                                                                 | 25484615 | 2014           | 1         | metabolism          | Metabolite |
| Barbas, C.F. et al. J. Am. Chem. Soc. 112 2013-2014 1990                                                                                                        |          | 1990           | 1         | metabolism          | Metabolite |
| Chiu, T.H. et al. Methods Enzymol. 42C 264-269 1975                                                                                                             |          | 1975           | 1         | metabolism          | Metabolite |
| Kiick, K.L. et al. Tetrahedron 56 9487-9493 2000                                                                                                                |          | 2000           | 2         | metabolism          | Metabolite |
| Kruger, N.J. Biochem. Soc. Trans. 17 760-761 1989 Escherichia coli ; 0 0                                                                                        |          | 1989           | 1         | metabolism          | Metabolite |
| Mino, K et al. 2014. Bioscience, Biotechnology, and Biochemistry                                                                                                |          | 2014           | 3         | metabolism          | Metabolite |
| Sheperdson, M.; Pardee, A.B. J. Biol. Chem. 235 3233-3237 1960                                                                                                  |          | 1960           | 1         | metabolism          | Metabolite |
| Zhang, Q.; Liu, H.w. J. Am. Chem. Soc. 122 9065-9070 2000                                                                                                       |          | 2000           | 1         | metabolism          | Metabolite |
| <a href="http://www.ncbi.nlm.nih.gov/pubmed/2994567">http://www.ncbi.nlm.nih.gov/pubmed/2994567</a>                                                             |          | 1985           | 1         | signal transduction | RNA        |
| <a href="http://gene.bio.jhu.edu/Ourspdf/89.pdf">http://gene.bio.jhu.edu/Ourspdf/89.pdf</a>                                                                     | 9367758  | 1997           | 1         | signal transduction | RNA        |
| <a href="http://jb.asm.org/content/177/10/2798.full.pdf+html">http://jb.asm.org/content/177/10/2798.full.pdf+html</a>                                           |          | 1995           | 1         | signal transduction | RNA        |
| <a href="http://jb.asm.org/content/179/1/228.full.pdf">http://jb.asm.org/content/179/1/228.full.pdf</a>                                                         |          | 1997           | 1         | signal transduction | RNA        |
| <a href="http://jb.asm.org/content/194/18/5110.full.pdf">http://jb.asm.org/content/194/18/5110.full.pdf</a>                                                     |          | 2012           | 1         | signal transduction | RNA        |
| <a href="http://journals.plos.org/plosone/article?id=10.1371/journal.pone.0057712">http://journals.plos.org/plosone/article?id=10.1371/journal.pone.0057712</a> |          | 2013           | 1         | signal transduction | RNA        |

Table S9 continued.

| Citation                                                                                                                                                              | PMID | Year Published | Data Used | Process             | Equation |
|-----------------------------------------------------------------------------------------------------------------------------------------------------------------------|------|----------------|-----------|---------------------|----------|
| <a href="http://link.springer.com/chapter/10.1007%2F7171_2006_088">http://link.springer.com/chapter/10.1007%2F7171_2006_088</a>                                       |      | 2007           | 1         | signal transduction | RNA      |
| <a href="http://mmbbr.asm.org/content/57/2/320.full.pdf">http://mmbbr.asm.org/content/57/2/320.full.pdf</a>                                                           |      | 1993           | 2         | signal transduction | RNA      |
| <a href="http://nar.oxfordjournals.org/content/early/2012/12/14/nar.gks1207.full.pdf">http://nar.oxfordjournals.org/content/early/2012/12/14/nar.gks1207.full.pdf</a> |      | 2012           | 1         | signal transduction | RNA      |
| <a href="http://nar.oxfordjournals.org/content/early/2015/01/05/nar.gku1374.full">http://nar.oxfordjournals.org/content/early/2015/01/05/nar.gku1374.full</a>         |      | 2015           | 1         | signal transduction | RNA      |
| <a href="http://pubs.acs.org/doi/pdf/10.1021/bi901158h">http://pubs.acs.org/doi/pdf/10.1021/bi901158h</a>                                                             |      | 2009           | 1         | signal transduction | RNA      |
| <a href="http://pubs.rsc.org/En/content/articlepdf/2015/mt/c4mt00180j">http://pubs.rsc.org/En/content/articlepdf/2015/mt/c4mt00180j</a>                               |      | 2014           | 2         | signal transduction | RNA      |
| <a href="http://www.horizonpress.com/cimb/v/v8/04.pdf">http://www.horizonpress.com/cimb/v/v8/04.pdf</a>                                                               |      | 2006           | 9         | signal transduction | RNA      |
| <a href="http://www.jbc.org/content/261/1/238.full.pdf">http://www.jbc.org/content/261/1/238.full.pdf</a>                                                             |      | 1986           | 1         | signal transduction | RNA      |
| <a href="http://www.jbc.org/content/261/23/10936.full.pdf">http://www.jbc.org/content/261/23/10936.full.pdf</a>                                                       |      | 1986           | 1         | signal transduction | RNA      |
| <a href="http://www.jbc.org/content/272/20/13026.full.pdf">http://www.jbc.org/content/272/20/13026.full.pdf</a>                                                       |      | 1997           | 2         | signal transduction | RNA      |
| <a href="http://www.jbc.org/content/272/22/14257.long">http://www.jbc.org/content/272/22/14257.long</a>                                                               |      | 1997           | 2         | signal transduction | RNA      |
| <a href="http://www.jbc.org/content/272/27/16962.full.pdf">http://www.jbc.org/content/272/27/16962.full.pdf</a>                                                       |      | 1997           | 1         | signal transduction | RNA      |
| <a href="http://www.jbc.org/content/272/3/1440.long">http://www.jbc.org/content/272/3/1440.long</a>                                                                   |      | 1997           | 1         | signal transduction | RNA      |
| <a href="http://www.jbc.org/content/273/50/33652.full.pdf">http://www.jbc.org/content/273/50/33652.full.pdf</a>                                                       |      | 1998           | 1         | signal transduction | RNA      |
| <a href="http://www.jbc.org/content/281/50/38189.full.pdf">http://www.jbc.org/content/281/50/38189.full.pdf</a>                                                       |      | 2006           | 1         | signal transduction | RNA      |
| <a href="http://www.jbc.org/content/282/22/16476.full.pdf">http://www.jbc.org/content/282/22/16476.full.pdf</a>                                                       |      | 2007           | 4         | signal transduction | RNA      |
| <a href="http://www.jbc.org/content/284/32/21218.full.pdf">http://www.jbc.org/content/284/32/21218.full.pdf</a>                                                       |      | 2009           | 2         | signal transduction | RNA      |
| <a href="http://www.ncbi.nlm.nih.gov/pmc/articles/PMC2373468/">http://www.ncbi.nlm.nih.gov/pmc/articles/PMC2373468/</a>                                               |      | 2002           | 1         | signal transduction | RNA      |
| <a href="http://www.ncbi.nlm.nih.gov/pmc/articles/PMC2435081/">http://www.ncbi.nlm.nih.gov/pmc/articles/PMC2435081/</a>                                               |      | 2008           | 2         | signal transduction | RNA      |
| <a href="http://www.ncbi.nlm.nih.gov/pmc/articles/PMC2561245/">http://www.ncbi.nlm.nih.gov/pmc/articles/PMC2561245/</a>                                               |      | 2008           | 2         | signal transduction | RNA      |
| <a href="http://www.ncbi.nlm.nih.gov/pmc/articles/PMC2655528/">http://www.ncbi.nlm.nih.gov/pmc/articles/PMC2655528/</a>                                               |      | 2009           | 1         | signal transduction | RNA      |
| <a href="http://www.ncbi.nlm.nih.gov/pmc/articles/PMC400900/pdf/emboj00127-0331.pdf">http://www.ncbi.nlm.nih.gov/pmc/articles/PMC400900/pdf/emboj00127-0331.pdf</a>   |      | 1989           | 1         | signal transduction | RNA      |
| <a href="http://www.ncbi.nlm.nih.gov/pmc/articles/PMC94037/">http://www.ncbi.nlm.nih.gov/pmc/articles/PMC94037/</a>                                                   |      | 1999           | 4         | signal transduction | RNA      |
| <a href="http://www.ncbi.nlm.nih.gov/pubmed/15380549">http://www.ncbi.nlm.nih.gov/pubmed/15380549</a>                                                                 |      | 2004           | 1         | signal transduction | RNA      |
| <a href="http://www.ncbi.nlm.nih.gov/pubmed/17644067">http://www.ncbi.nlm.nih.gov/pubmed/17644067</a>                                                                 |      | 2007           | 3         | signal transduction | RNA      |
| <a href="http://www.ncbi.nlm.nih.gov/pubmed/18532985">http://www.ncbi.nlm.nih.gov/pubmed/18532985</a>                                                                 |      | 2008           | 1         | signal transduction | RNA      |
| <a href="http://www.ncbi.nlm.nih.gov/pubmed/22148640">http://www.ncbi.nlm.nih.gov/pubmed/22148640</a>                                                                 |      | 2012           | 1         | signal transduction | RNA      |
| <a href="http://www.ncbi.nlm.nih.gov/pubmed/23075318">http://www.ncbi.nlm.nih.gov/pubmed/23075318</a>                                                                 |      | 2013           | 1         | signal transduction | RNA      |
| <a href="http://www.ncbi.nlm.nih.gov/pubmed/23941567">http://www.ncbi.nlm.nih.gov/pubmed/23941567</a>                                                                 |      | 2013           | 2         | signal transduction | RNA      |
| <a href="http://www.ncbi.nlm.nih.gov/pubmed/24948475">http://www.ncbi.nlm.nih.gov/pubmed/24948475</a>                                                                 |      | 2014           | 3         | signal transduction | RNA      |
| <a href="http://www.ncbi.nlm.nih.gov/pubmed/25369000">http://www.ncbi.nlm.nih.gov/pubmed/25369000</a>                                                                 |      | 2014           | 1         | signal transduction | RNA      |
| <a href="http://www.ncbi.nlm.nih.gov/pubmed/8559067">http://www.ncbi.nlm.nih.gov/pubmed/8559067</a>                                                                   |      | 1995           | 3         | signal transduction | RNA      |
| <a href="http://www.ncbi.nlm.nih.gov/pubmed/9278422">http://www.ncbi.nlm.nih.gov/pubmed/9278422</a>                                                                   |      | 1997           | 1         | signal transduction | RNA      |
| <a href="http://www.pnas.org/content/101/33/12148.full.pdf">http://www.pnas.org/content/101/33/12148.full.pdf</a>                                                     |      | 2004           | 1         | signal transduction | RNA      |
| <a href="http://www.pnas.org/content/94/7/2957.full.pdf">http://www.pnas.org/content/94/7/2957.full.pdf</a>                                                           |      | 1997           | 1         | signal transduction | RNA      |
| <a href="http://www.pnas.org/content/96/17/9833.full.pdf">http://www.pnas.org/content/96/17/9833.full.pdf</a>                                                         |      | 1999           | 1         | signal transduction | RNA      |
| <a href="http://www.pnas.org/content/98/2/435.full.pdf">http://www.pnas.org/content/98/2/435.full.pdf</a>                                                             |      | 2001           | 1         | signal transduction | RNA      |
| <a href="http://www.sciencedirect.com/science/article/pii/S0022283603002626">http://www.sciencedirect.com/science/article/pii/S0022283603002626</a>                   |      | 2003           | 1         | signal transduction | RNA      |
| <a href="http://www.sciencedirect.com/science/article/pii/S2211546314000369">http://www.sciencedirect.com/science/article/pii/S2211546314000369</a>                   |      | 2014           | 2         | signal transduction | RNA      |
| <a href="http://www.sciencedirect.com/science/bookseries/00702161">http://www.sciencedirect.com/science/bookseries/00702161</a>                                       |      | 1990           | 2         | signal transduction | RNA      |
| <a href="http://www.sciencemag.org/content/292/5526/2488.long">http://www.sciencemag.org/content/292/5526/2488.long</a>                                               |      | 2001           | 1         | signal transduction | RNA      |
| <a href="http://www.sciencemag.org/content/301/5638/1383.long">http://www.sciencemag.org/content/301/5638/1383.long</a>                                               |      | 2003           | 1         | signal transduction | RNA      |

**Movie S1. Heterogeneous data integration via a large-scale model.** This video shows the production, over several decades, of a subset of the data used as an input to our model. Each paper is depicted as a circle; once all of the circles have been generated, the size of the circles is briefly altered (on a log scale) to reflect the difference in data content between studies (e.g., scientists using early biochemical techniques might report a handful of data points in one manuscript, while those using RNA-Seq might report thousands or millions). The circles are then grouped and integrated into mathematical equations; for simplicity, only those related to RNA, proteins and small molecules are shown here. These equations are then themselves integrated into a unified mathematical model. More details about data sources shown in the movie are listed in Table S9.

**Movie S2. A simulation of the shift from minimal to amino acid-supplemented media conditions.** First, the growth and replication of the cell is depicted under minimal media + glucose conditions, as simulated by our model. Once amino acids are added to the media, a number of signaling systems are activated, which leads to a change in transcription factor activity, gene expression and metabolic flux. These changes further lead to an increase in ribosome production, as well as a larger and faster-growing cell that utilizes multiple replication forks to achieve its higher growth rate.

## References

1. J. Gunawardena, *Nature biotechnology* **30**, 838 (2012).
2. A. Jain, Fireworks 1.6.2 documentation, <https://materialsproject.github.io/fireworks/>.
3. J. R. Karr, *et al.*, *Cell* **150**, 389 (2012).
4. Y. Tanouchi, *et al.*, *Nature* **523**, 357 (2015).
5. J. T. Sauls, D. Li, S. Jun, *Current opinion in cell biology* **38**, 38 (2016).
6. H. Bremer, G. Churchward, *Journal of Theoretical Biology* **69**, 645 (1977).
7. H. Bremer, P. P. Dennis, *EcoSal Plus* **3** (2008).
8. J. A. Bernstein, A. B. Khodursky, P.-H. Lin, S. Lin-Chao, S. N. Cohen, *Proceedings of the National Academy of Sciences* **99**, 9697 (2002).
9. J. B. Russell, G. M. Cook, *Microbiological reviews* **59**, 48 (1995).
10. G.-W. Li, D. Burkhardt, C. Gross, J. S. Weissman, *Cell* **157**, 624 (2014).
11. A. Schmidt, *et al.*, *Nature biotechnology* **34**, 104 (2016).
12. J. W. Tobias, T. E. Shrader, G. Rocap, A. Varshavsky, *Science (New York, N.Y.)* **254**, 1374 (1991).
13. I. M. Keseler, *et al.*, *Nucleic acids research* **41**, D605 (2013).
14. E. W. Birch, M. Udell, M. W. Covert, *Journal of Theoretical Biology* **345**, 12 (2014).
15. D. Weaver, I. Keseler, A. Machkie, I. Paulsen, P. Karp, *BMC Systems Biology* **8** (2014).

16. J. D. Orth, *et al.*, *Molecular systems biology* **7**, 535 (2011).
17. B. D. Bennett, *et al.*, *Nature chemical biology* **5**, 593 (2009).
18. D. S. Weaver, I. M. Keseler, A. Mackie, I. T. Paulsen, P. D. Karp, *BMC Systems Biology* **8**, 79 (2014).
19. I. Schomburg, *et al.*, *Nucleic acids research* **41**, D764 (2013).
20. A. Bar-Even, *et al.*, *Biochemistry* **50**, 4402 (2011).
21. P. D. Karp, *et al.*, *EcoSal Plus* (2014).
22. Y. Toya, *et al.*, *Biotechnology progress* **26**, 975 (2010).
23. A. M. Feist, *et al.*, *Molecular systems biology* **3**, 121 (2007).
24. F. R. Blattner, *et al.*, *Science (New York, N.Y.)* **277**, 1453 (1997).
25. H. Bremer, P. Dennis, *Escherichia coli and Salmonella: cellular and molecular biology*, **2**, 1553 (1996).
26. W. D. Donachie, *The American Journal of Gastroenterology* **219**, 1077 (1968).
27. F. C. Neidhardt, J. L. Ingraham, M. Schaechter, *Physiology of the bacterial cell: a molecular approach* (Sinauer Associates Sunderland, MA, 1990).
28. M. Wallden, D. Fange, E. G. Lundius, Ö. Baltekin, J. Elf, *Cell* **166**, 729 (2016).
29. H. Brunschede, T. Dove, H. Bremer, *Journal of Bacteriology* **129**, 1020 (1977).
30. G. Reshes, S. Vanounou, I. Fishov, M. Feingold, *Physical Biology* **5** (2008).



31. H. Bremer, P. P. Dennis, *et al.*, *Escherichia coli and Salmonella: cellular and molecular biology* **2**, 1553 (1996).
32. M. Scott, C. W. Gunderson, E. M. Mateescu, Z. Zhang, T. Hwa, *Science* **330**, 1099 (2010).
33. M. Wallden, D. Fange, E. G. Lundius, Ö. Baltekin, J. Elf, *Cell* **166**, 729 (2016).
34. J. R. Karr, *et al.*, *Cell* **150**, 389 (2012).
35. M. Campos, *et al.*, *Cell* **159**, 1433 (2014).
36. H. M. T. Y. O. Y. B. M. D. K. T. M. . W. B. Baba T, Ara T, M. H, *Molecular Systems Biology* **2**, 2006.0008 (2006).
37. A. R. Joyce, *et al.*, *Journal of bacteriology* **188**, 8259 (2006).
38. F. C. Neidhardt, P. L. Bloch, D. F. Smith, *Journal of bacteriology* **119**, 736 (1974).
39. B. Bushnell, Bbmap short read aligner, and other bioinformatics tools, <http://sourceforge.net/projects/bbmap> (2016).
40. B. Li, C. N. Dewey, *BMC bioinformatics* **12**, 323 (2011).
41. M. Kitagawa, *et al.*, *DNA research* **12**, 291 (2005).
42. M. MR, *Experientia* **48**, 178 (1992).
43. K. Nath, A. L. Koch, *Journal of Biological Chemistry* **245**, 2889 (1970).
44. H. Pang, H. Winkler, *Molecular Microbiology* **12**, 115 (1994).
45. D. Kennel, *Journal of Molecular Biology* **34**, 85 (1968).

46. M. W. Covert, E. M. Knight, J. L. Reed, M. J. Herrgard, B. O. Palsson, *Nature Letter* **429**, 92 (2004).
47. F. Mohammad, R. Green, A. Buskirk, *eLIFE* **8**, 1 (2019).
48. A. Beck, K. Hunt, R. Carlson, *Processes* **6**, 38 (2018).
49. J. Moffitt, S. Pandey, A. Boettiger, S. Wang, X. Zhuang, *eLIFE* **5**, 1 (2016).
50. S. Pedersen, *EMBO Journal* **3**, 2895 (1984).
51. X. Dai, *et al.*, *Nature Microbiology* **2** (2016).
52. F. Neidhardt, H. Umbarger, *Escherichia coli and Salmonella: Cellular and Molecular Biology*, F. Neidhardt, ed. (American Society of Microbiology, 1996), chap. 3, p. 2.
