# Supplementary material
Source: PubMed Central journal article supplement (PMC7990026)

Figure S1

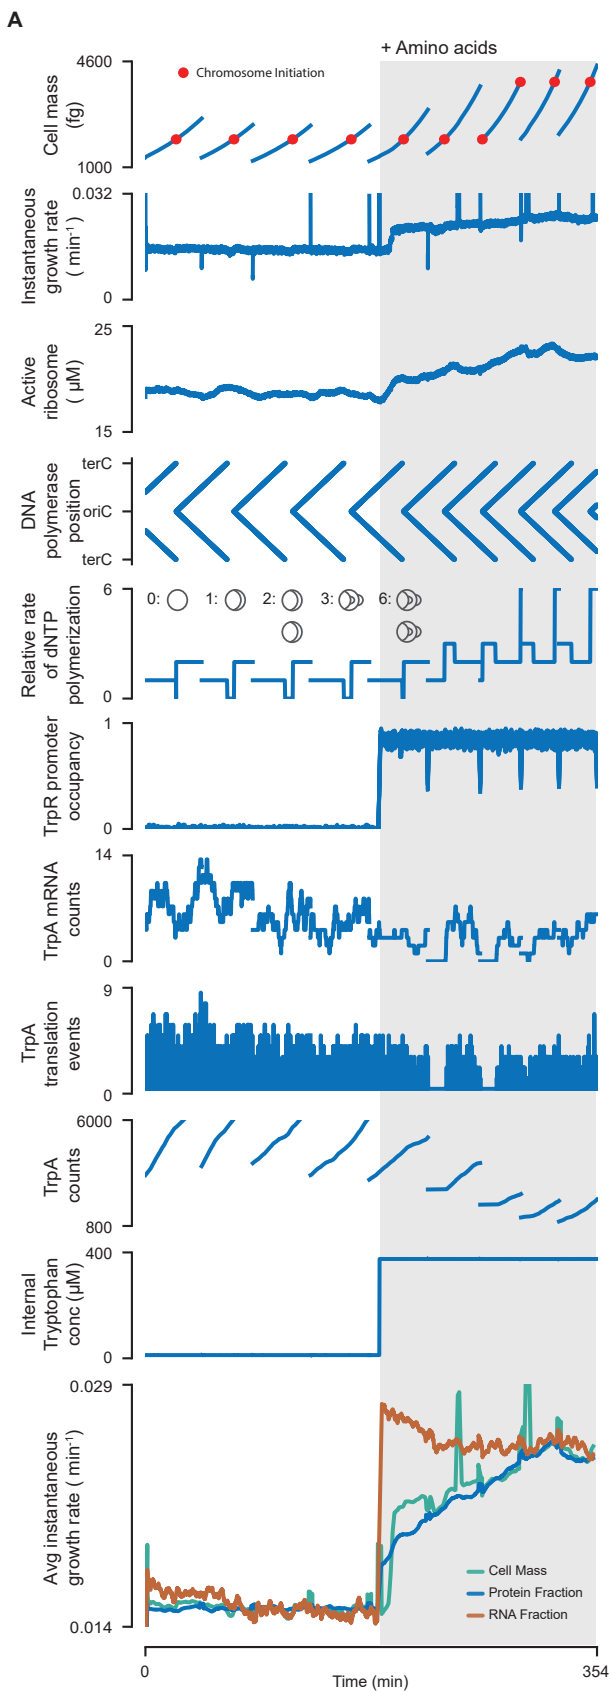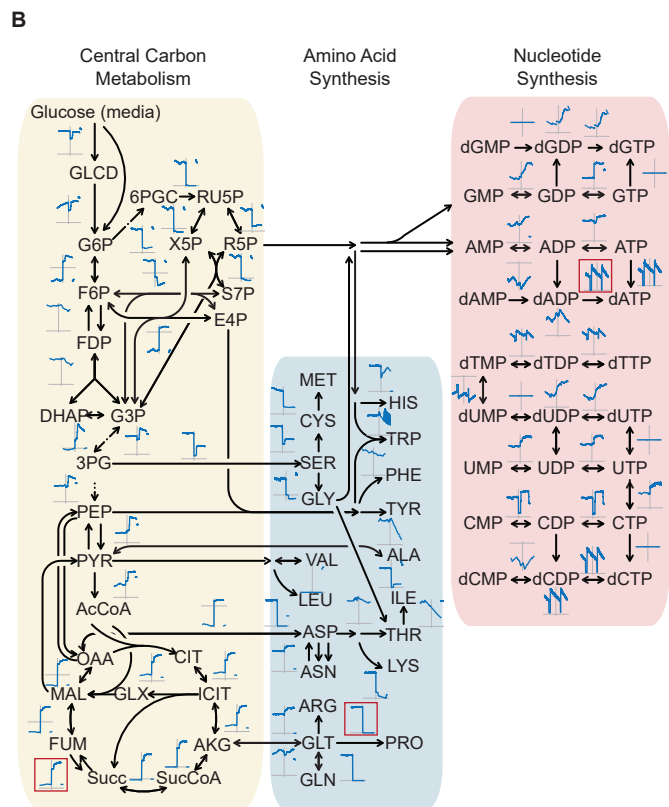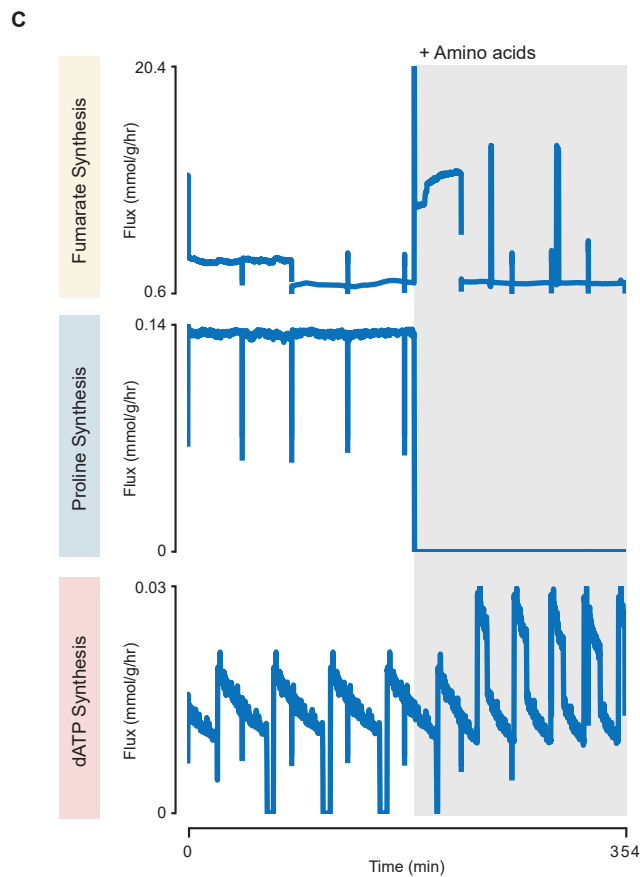

Supplement: NIHMS1657274-supplement-supp_fig1.pdf [file NIHMS1657274-supplement-supp_fig1.pdf]

Figure S2B

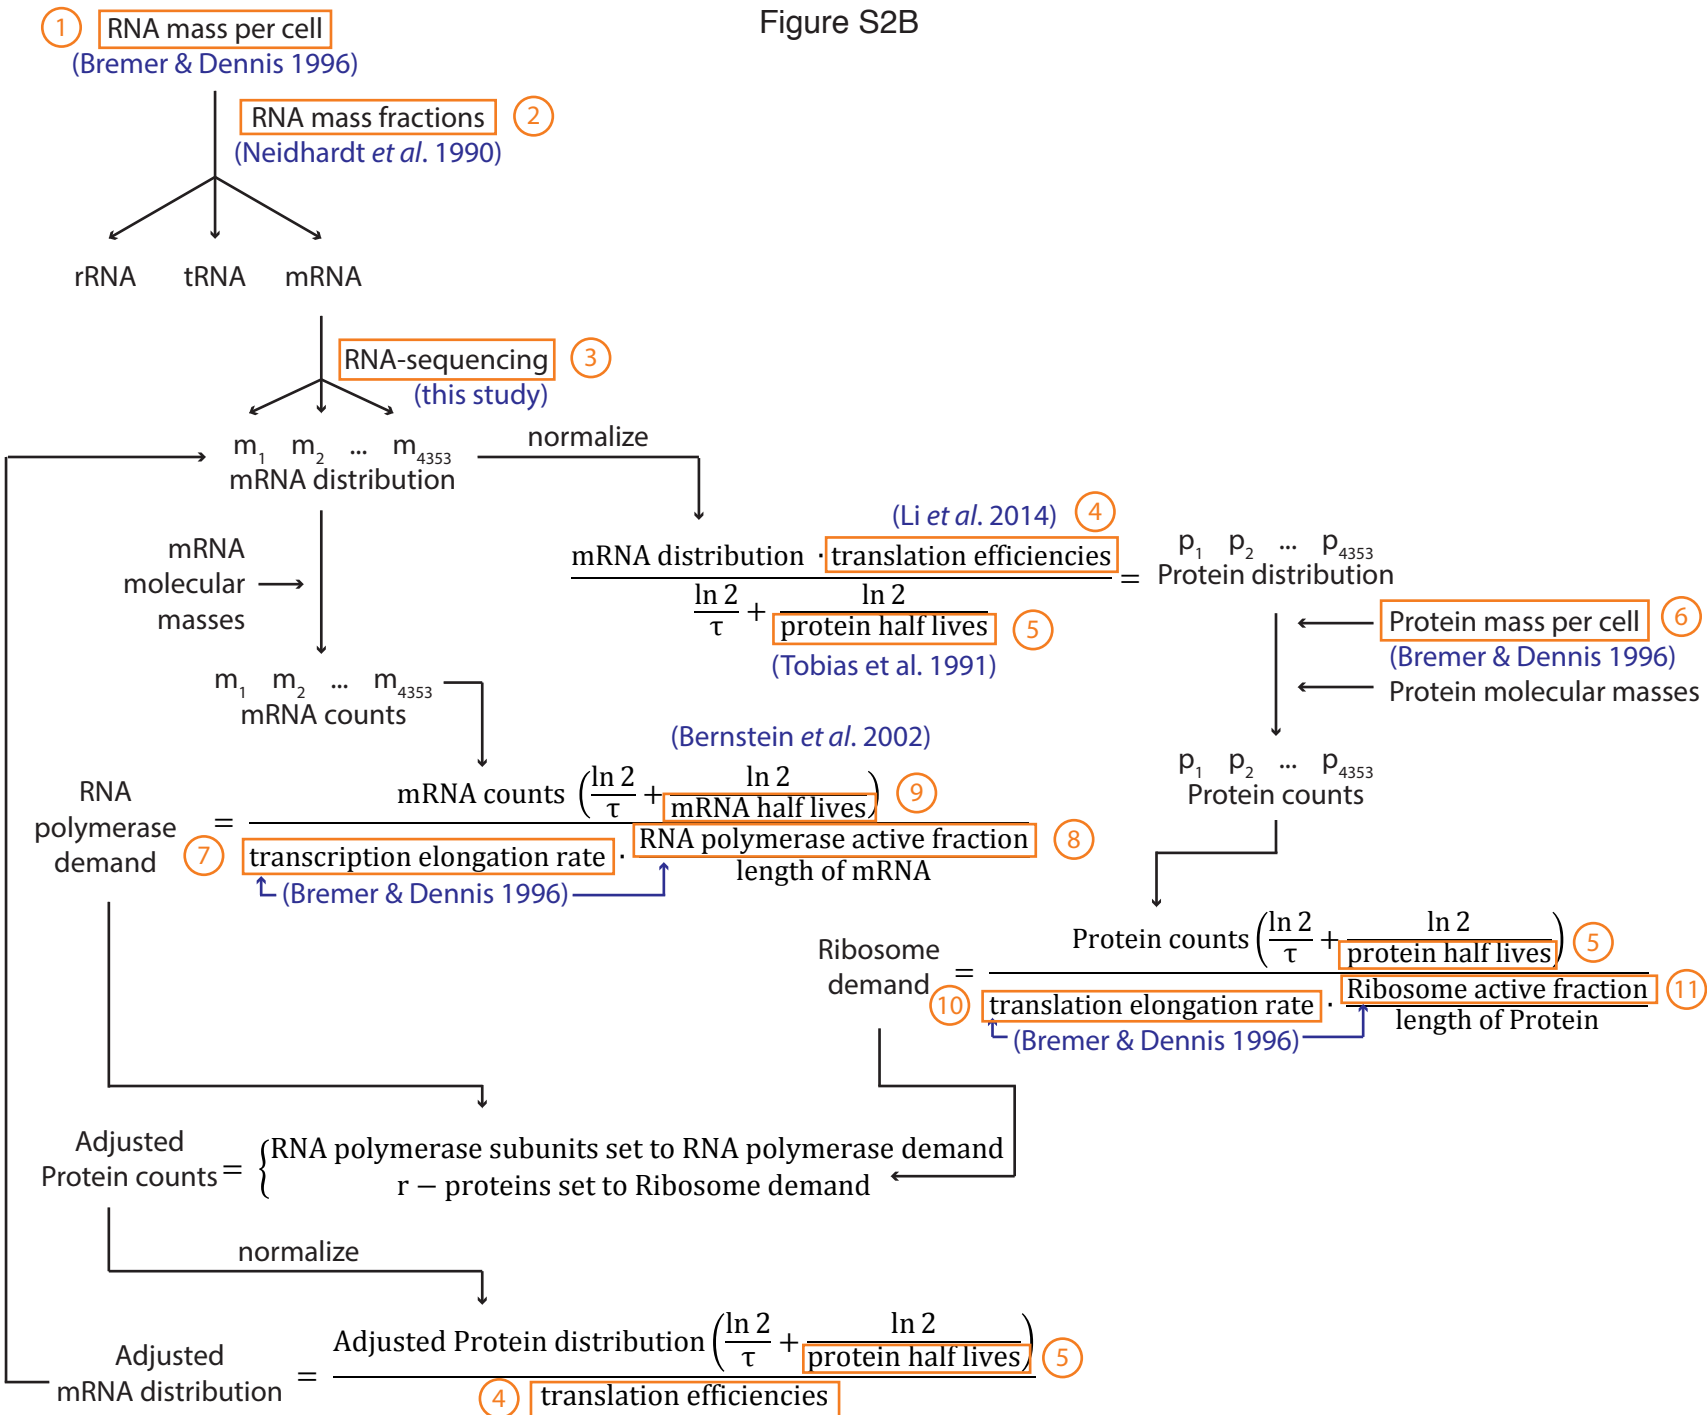

Supplement: NIHMS1657274-supplement-supp_fig2B.pdf [file NIHMS1657274-supplement-supp_fig2B.pdf]

Figure S3

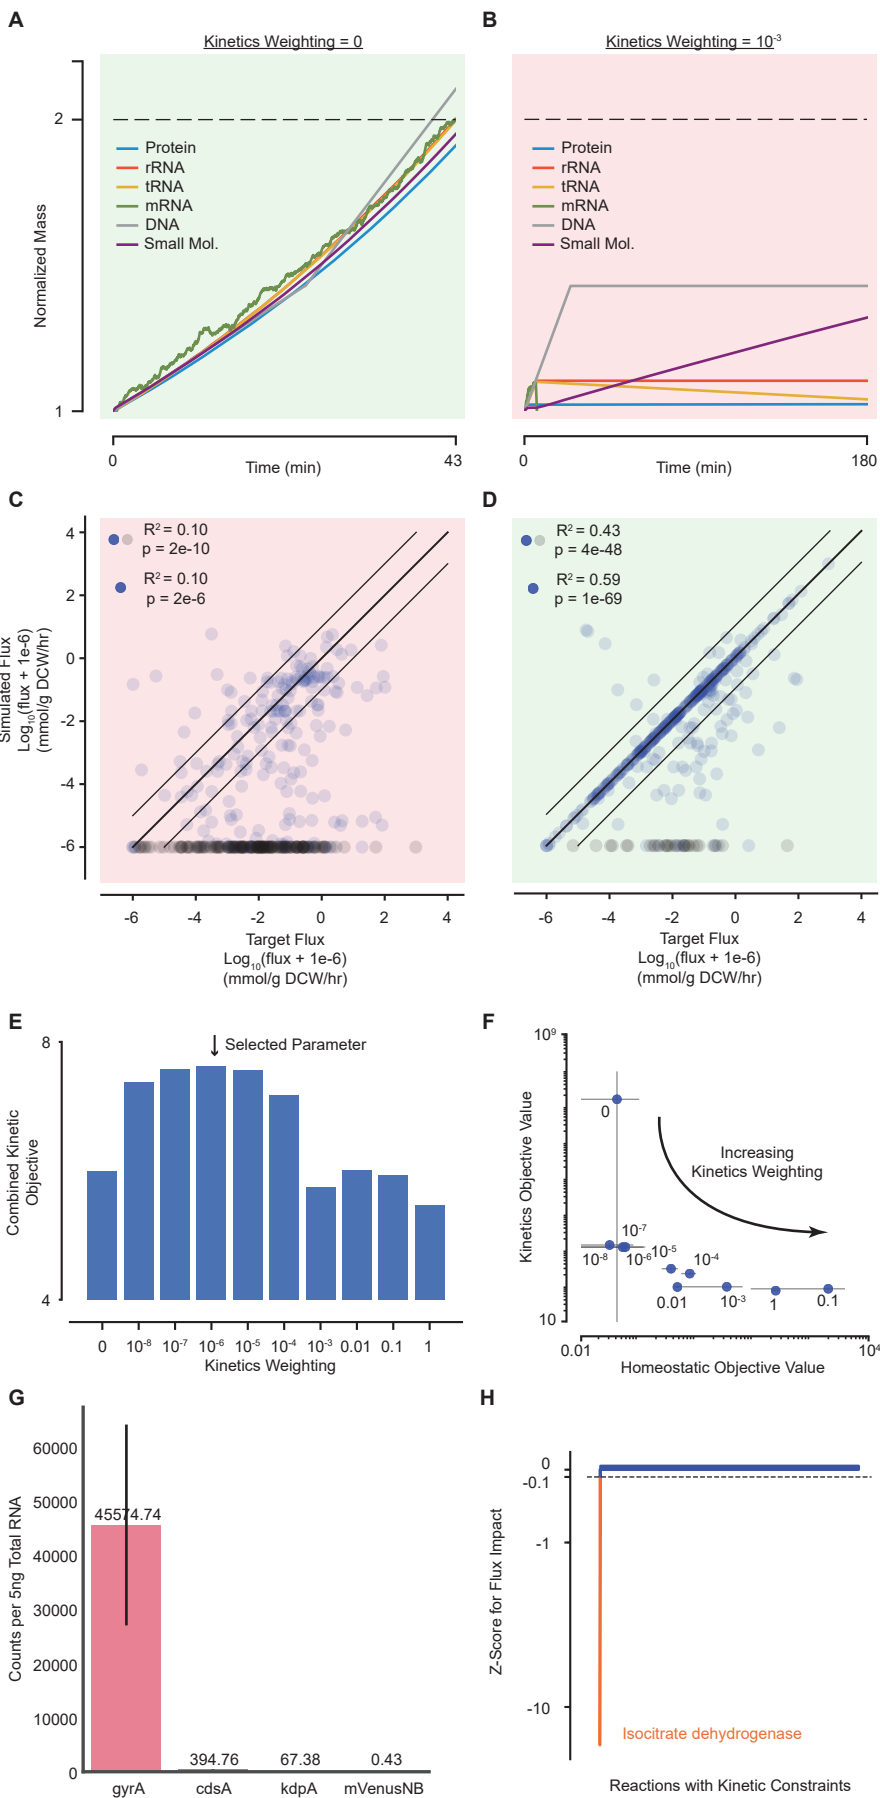

Supplement: NIHMS1657274-supplement-supp_fig3.pdf [file NIHMS1657274-supplement-supp_fig3.pdf]

Figure S4

Sensitivity Analysis: *PabB* depletion

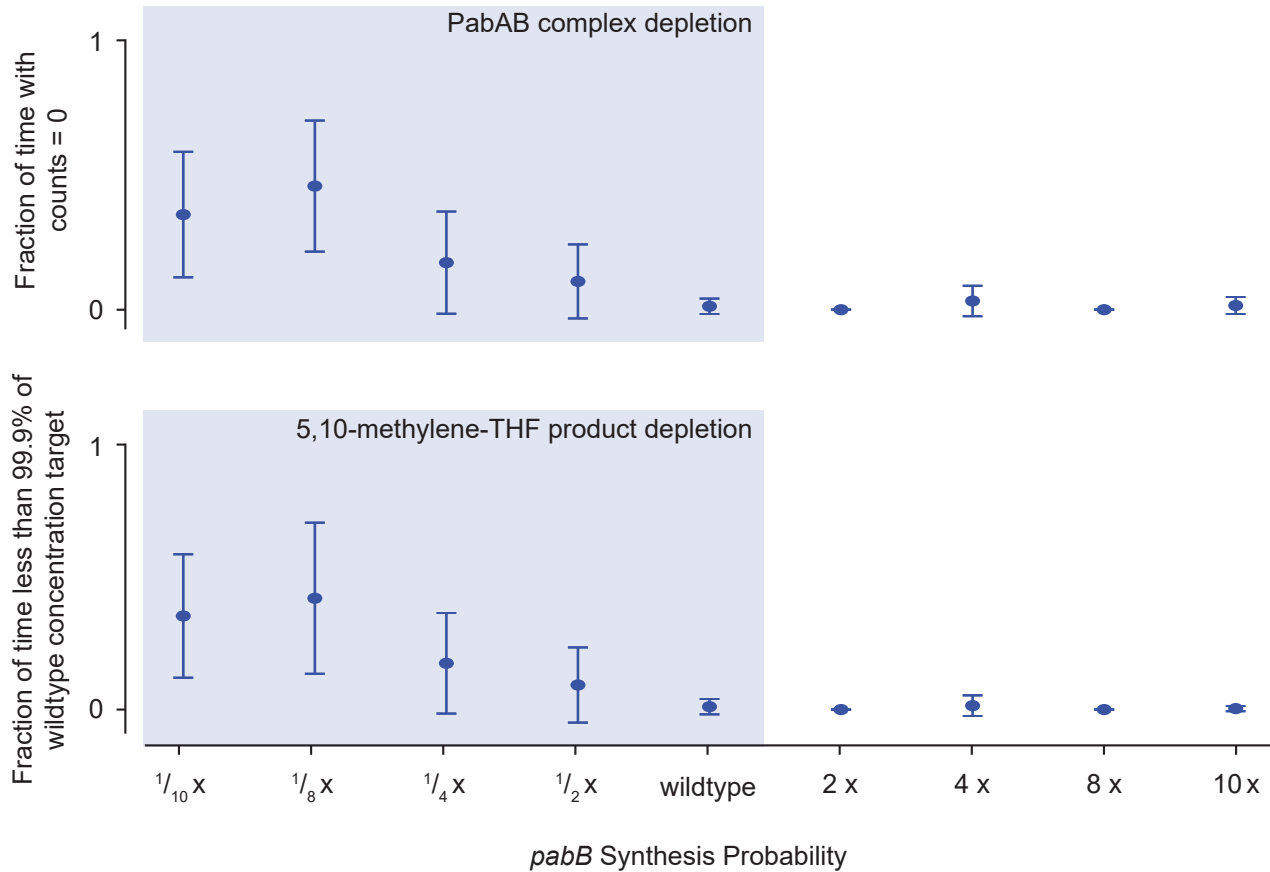

Supplement: NIHMS1657274-supplement-supp_fig4.pdf [file NIHMS1657274-supplement-supp_fig4.pdf]

Figure S5

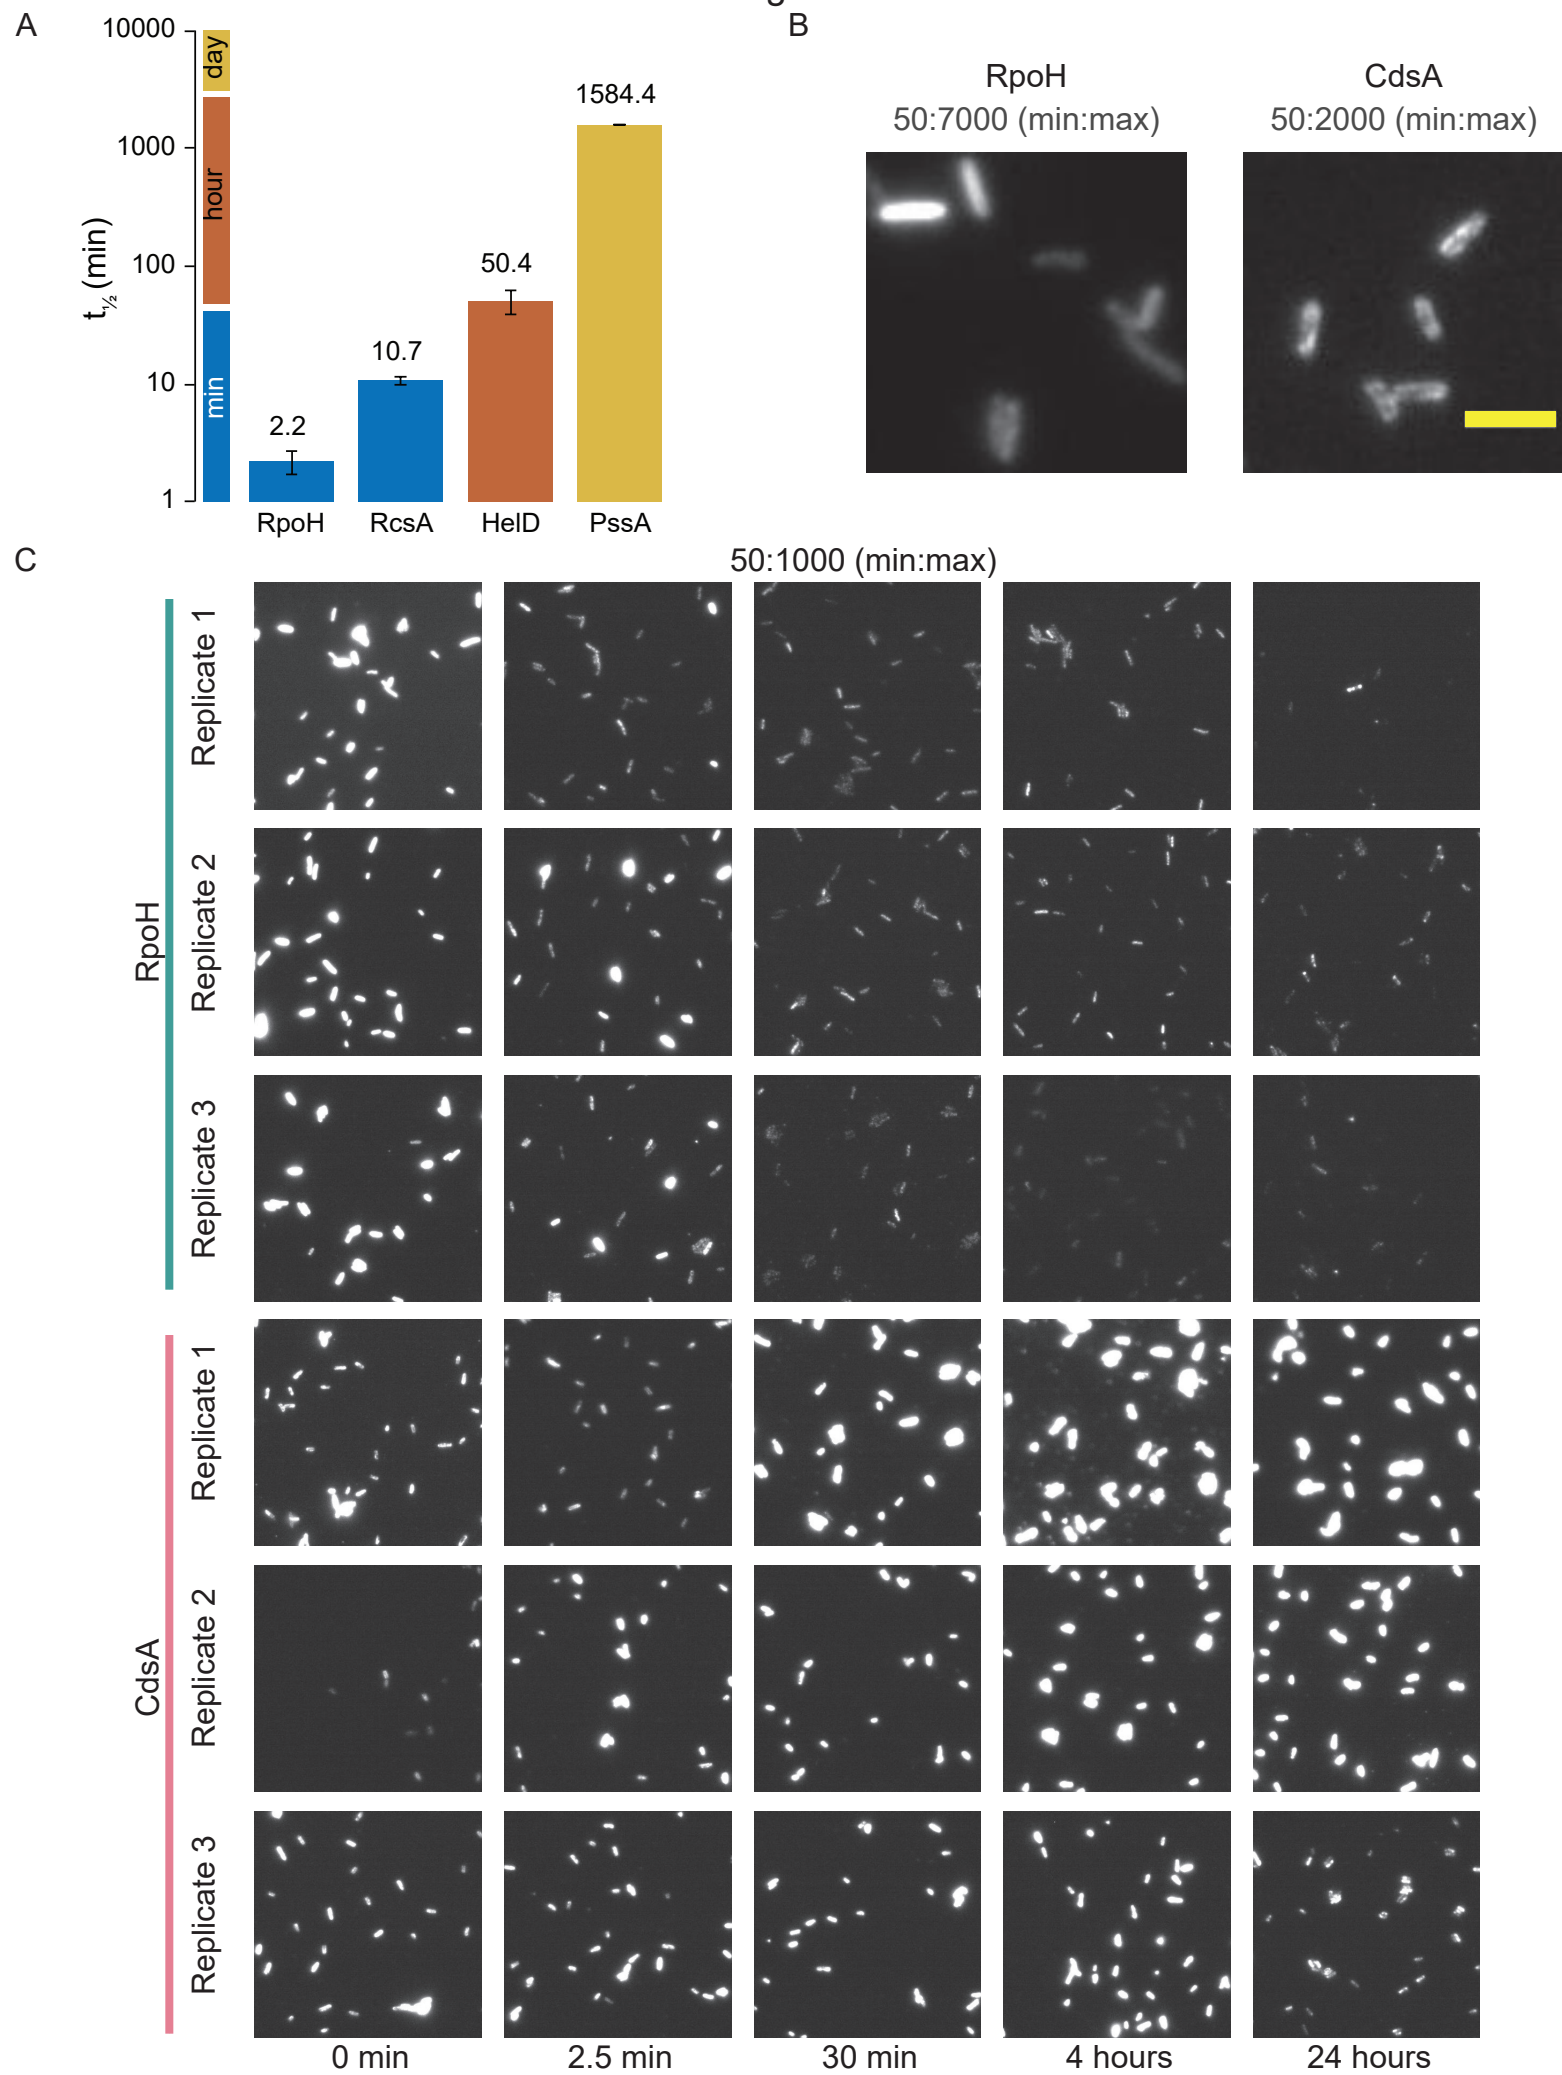

Supplement: NIHMS1657274-supplement-supp_fig5-1.pdf [file NIHMS1657274-supplement-supp_fig5-1.pdf]
